# Supplementary material for: Canadian Anaphylaxis Network-Predicting Recurrence after Emergency Presentation for Allergic REaction (CAN-PREPARE): a prospective, cohort study protocol
Source: PubMed Central journal article supplement — BMJ Open. 2022 Oct 31;12(10):e061976. doi: 10.1136/bmjopen-2022-061976 (PMC9628530; doi:10.1136/bmjopen-2022-061976), 2022-10-31
Supplement: bmjopen-2022-061976.draft_revisions.pdf [file bmjopen-2022-061976.draft_revisions.pdf]

# BMJ Open

BMJ Open is committed to open peer review. As part of this commitment we make the peer review history of every article we publish publicly available.

When an article is published we post the peer reviewers' comments and the authors' responses online. We also post the versions of the paper that were used during peer review. These are the versions that the peer review comments apply to.

The versions of the paper that follow are the versions that were submitted during the peer review process. They are not the versions of record or the final published versions. They should not be cited or distributed as the published version of this manuscript.

BMJ Open is an open access journal and the full, final, typeset and author-corrected version of record of the manuscript is available on our site with no access controls, subscription charges or pay-per-view fees (<http://bmjopen.bmj.com>).

If you have any questions on BMJ Open's open peer review process please email [info.bmjopen@bmj.com](mailto:info.bmjopen@bmj.com)

# BMJ Open

## Canadian Anaphylaxis Network- Predicting Recurrence after Emergency Presentation for Allergic REaction (CAN-PREPARE): A Prospective Cohort Study Protocol

|                               |                                                                                                                                                                                                                                                                                                                                                                                                                                                                                                                                                                                                                                                                                                                                                                                                                                                                                                                                                                                                                                                                                                                                                                                                                                                                                                                                                                                                                                                                                                                                                                                                                                                                                                                                                                                                                                                                                                                                                                                                          |
|-------------------------------|----------------------------------------------------------------------------------------------------------------------------------------------------------------------------------------------------------------------------------------------------------------------------------------------------------------------------------------------------------------------------------------------------------------------------------------------------------------------------------------------------------------------------------------------------------------------------------------------------------------------------------------------------------------------------------------------------------------------------------------------------------------------------------------------------------------------------------------------------------------------------------------------------------------------------------------------------------------------------------------------------------------------------------------------------------------------------------------------------------------------------------------------------------------------------------------------------------------------------------------------------------------------------------------------------------------------------------------------------------------------------------------------------------------------------------------------------------------------------------------------------------------------------------------------------------------------------------------------------------------------------------------------------------------------------------------------------------------------------------------------------------------------------------------------------------------------------------------------------------------------------------------------------------------------------------------------------------------------------------------------------------|
| Journal:                      | <i>BMJ Open</i>                                                                                                                                                                                                                                                                                                                                                                                                                                                                                                                                                                                                                                                                                                                                                                                                                                                                                                                                                                                                                                                                                                                                                                                                                                                                                                                                                                                                                                                                                                                                                                                                                                                                                                                                                                                                                                                                                                                                                                                          |
| Manuscript ID                 | bmjopen-2022-061976                                                                                                                                                                                                                                                                                                                                                                                                                                                                                                                                                                                                                                                                                                                                                                                                                                                                                                                                                                                                                                                                                                                                                                                                                                                                                                                                                                                                                                                                                                                                                                                                                                                                                                                                                                                                                                                                                                                                                                                      |
| Article Type:                 | Protocol                                                                                                                                                                                                                                                                                                                                                                                                                                                                                                                                                                                                                                                                                                                                                                                                                                                                                                                                                                                                                                                                                                                                                                                                                                                                                                                                                                                                                                                                                                                                                                                                                                                                                                                                                                                                                                                                                                                                                                                                 |
| Date Submitted by the Author: | 14-Feb-2022                                                                                                                                                                                                                                                                                                                                                                                                                                                                                                                                                                                                                                                                                                                                                                                                                                                                                                                                                                                                                                                                                                                                                                                                                                                                                                                                                                                                                                                                                                                                                                                                                                                                                                                                                                                                                                                                                                                                                                                              |
| Complete List of Authors:     | <p>Alqurashi, Waleed; University of Ottawa Faculty of Medicine, Department of Pediatrics and Emergency Medicine; Children's Hospital of Eastern Ontario Research Institute</p> <p>Shaker, Marcus; Children's Hospital at Dartmouth-Hitchcock, Section of Allergy and Clinical Immunology</p> <p>Wells, George ; University of Ottawa Heart Institute, Cardiovascular Research Methods Centre; University of Ottawa, School of Epidemiology and Public Health</p> <p>Collins, Gary; University of Oxford Nuffield Department of Orthopaedics Rheumatology and Musculoskeletal Sciences, Centre for Statistics in Medicine</p> <p>Greenhawt, Matthew ; Children's Hospital Colorado</p> <p>Curran, Janet; IWK Health Centre, Pediatrics</p> <p>Zemek, Roger; University of Ottawa Faculty of Medicine, Department of Pediatrics and Emergency Medicine; Children's Hospital of Eastern Ontario Research Institute</p> <p>Schuh, Suzanne; The Hospital for Sick Children, Pediatrics</p> <p>Ellis, Anne; Queen's University, Division of Allergy and Immunology</p> <p>Gerdts, Jennifer; Food Allergy Canada</p> <p>Kreviazuk, Cheryl; Children's Hospital of Eastern Ontario Research Institute</p> <p>Dixon, Andrew; Stollery Children's Hospital, Emergency Medicine</p> <p>Eltorki, Mohamed; McMaster Children's Hospital</p> <p>Freedman, Stephen; University of Calgary Cumming School of Medicine, Departments of Pediatrics and Emergency Medicine, Alberta Children's Hospital</p> <p>Gravel, Jocelyn; Centre Hospitalier Universitaire Sainte-Justine</p> <p>Poonai, Naveen; Western University, Departments of Paediatrics, Internal Medicine, Epidemiology &amp; Biostatistics</p> <p>Worm, Margitta; Charite Universitätsmedizin Berlin, Division of Allergy and Immunology, Department of Dermatology and Allergy</p> <p>Plint, Amy; University of Ottawa Faculty of Medicine, Department of Pediatrics and Emergency Medicine; Children's Hospital of Eastern Ontario Research Institute</p> |
| Keywords:                     | PAEDIATRICS, Paediatric A&E and ambulatory care < PAEDIATRICS, EPIDEMIOLOGY                                                                                                                                                                                                                                                                                                                                                                                                                                                                                                                                                                                                                                                                                                                                                                                                                                                                                                                                                                                                                                                                                                                                                                                                                                                                                                                                                                                                                                                                                                                                                                                                                                                                                                                                                                                                                                                                                                                              |
|                               |                                                                                                                                                                                                                                                                                                                                                                                                                                                                                                                                                                                                                                                                                                                                                                                                                                                                                                                                                                                                                                                                                                                                                                                                                                                                                                                                                                                                                                                                                                                                                                                                                                                                                                                                                                                                                                                                                                                                                                                                          |

1  
2  
3  
4  
5  
6  
7  
8  
9  
10  
11  
12  
13  
14  
15  
16  
17  
18  
19  
20  
21  
22  
23  
24  
25  
26  
27  
28  
29  
30  
31  
32  
33  
34  
35  
36  
37  
38  
39  
40  
41  
42  
43  
44  
45  
46  
47  
48  
49  
50  
51  
52  
53  
54  
55  
56  
57  
58  
59  
60

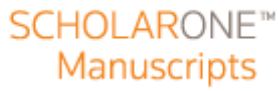

**TITLE PAGE****Title:**

Canadian Anaphylaxis Network- Predicting Recurrence after Emergency Presentation for Allergic REaction (CAN-PREPARE): A Prospective, Cohort Study Protocol

**Authors:**

Waleed Alqurashi, MD, MSc<sup>1,2\*</sup>; Marcus Shaker, MD, MSc<sup>3</sup>; George A. Wells, PhD<sup>4,5</sup>; Gary S. Collins, PhD<sup>6</sup>; Matthew Greenhawt, MD, MBA<sup>7</sup>; Janet Curran, PhD, RN<sup>8</sup>; Roger Zemek, MD<sup>1,2</sup>; Suzanne Schuh, MD<sup>9</sup>; Anne Ellis, MD, MSc<sup>10</sup>; Jennifer Gerds, BComm<sup>11</sup>; Cheryl Kreviazuk, BA<sup>2</sup>; Andrew Dixon, MD<sup>12</sup>; Mohamed Eltorki, MBChB<sup>13</sup>; Stephen B. Freedman, MDCM, MSc<sup>14</sup>; Jocelyn Gravel, MD, MSc<sup>15</sup>; Naveen Poonai, MD, MSc<sup>16</sup>; Margitta Worm, MD<sup>17</sup>; Amy C. Plint, MD, MSc<sup>1,2</sup>; Pediatric Emergency Research Canada (PERC).

**Affiliations:**

1 Department of Pediatrics and Emergency Medicine, Faculty of Medicine, University of Ottawa, 451 Smyth Road, Ottawa, Ontario, Canada, K1H 8M5

2 Children's Hospital of Eastern Ontario Research Institute, 401 Smyth Road, Ottawa, Ontario, Canada, K1H 8L1

3 Children's Hospital at Dartmouth, Section of Allergy and Clinical Immunology, 1 Medical Center Drive, Lebanon, New Hampshire, United States, 03756

4 Cardiovascular Research Methods Centre, University of Ottawa Heart Institute, 40 Ruskin Street, Ottawa, Ontario, Canada, K1Y 4W7.

1  
2  
3 5 School of Epidemiology and Public Health, University of Ottawa, 600 Peter Morand Crescent,  
4  
5  
6 Ottawa, Ontario, Canada, K1G 5Z3

7  
8 6 Centre for Statistics in Medicine, Nuffield Department of Orthopaedics, Rheumatology, and  
9  
10 Musculoskeletal Sciences, Windmill Road, University of Oxford, Oxford, UK, OX3 7LD

11  
12 7 Children's Hospital Colorado, 13123 East 16<sup>th</sup> Avenue, Aurora, Colorado, United States,  
13  
14  
15 80045

16  
17 8 IWK Health Centre, 5850 University Avenue, Halifax, Nova Scotia, Canada, B3K 6R8

18  
19 9 Hospital for Sick Children, 555 University Avenue, Toronto, Ontario, Canada, M5G 1X8

20  
21 10 Division of Allergy and Immunology, Department of Medicine, Queen's University, 15 Arch  
22  
23 Street, Kingston, Ontario, Canada, K7L 3N6

24  
25  
26 11 Food Allergy Canada, 505 Consumers Road, Toronto, Ontario, Canada, M2J 4V8

27  
28 12 Stollery Children's Hospital, 8440-112 Street, Edmonton, Alberta, Canada, T6G 2C8

29  
30 13 McMaster Children's Hospital, 1200 Main Street West, Hamilton, Ontario, Canada, L8S 4L8

31  
32 14 Departments of Pediatrics and Emergency Medicine, Alberta Children's Hospital, Cumming  
33  
34 School of Medicine, University of Calgary, 28 Oki Drive NW, Calgary, Alberta, Canada, T3B  
35  
36  
37 6A8

38  
39  
40 15 Centre Hospitalier Universitaire Sainte-Justine, Université de Montréal, 3175 Chemin de la  
41  
42 Cote-Ste-Catherine, Montréal, Québec, Canada, H3T 1C5

43  
44 16 Departments of Paediatrics, Internal Medicine, Epidemiology & Biostatistics, Western  
45  
46 University, 800 Commissioners Road East, London, Ontario, Canada, N6A 5W6

47  
48 17 Division of Allergy and Immunology, Dpt Dermatology and Allergy, Charité –  
49  
50  
51 Universitätsmedizin Berlin, Charitéplatz 1, D - 10117 Berlin, Berlin, Germany

**Corresponding Author:**

Waleed Alqurashi

Children's Hospital of Eastern Ontario (CHEO), 401 Smyth Road, Ottawa, ON, K1H 8L1

Phone: 613-737-7600 ext. 3799

Email: [walqurashi@cheo.on.ca](mailto:walqurashi@cheo.on.ca)

ORCID ID: <https://orcid.org/0000-0001-9772-5291>

**Keywords:** Paediatrics; Paediatric A&E and ambulatory care; Epidemiology

**Trial Protocol Version** 2-Feb-2022

**Trial Registration:** Clinicaltrials.gov NCT05135377

**Word Count:** 3200 / 4000 words

**ABSTRACT:****Introduction**

Anaphylaxis is a severe, potentially fatal multi-organ system manifestation of an allergic reaction. The highest incidence of anaphylaxis is in children and adolescents. Biphasic anaphylaxis (BA) is defined as the recurrence of allergic symptoms after resolution of an initial reaction. It has been reported to occur in 10-20% of cases within 1-48hours from the onset of the initial reaction. The dilemma for physicians is determining which patients with resolved anaphylaxis should be observed for BA, and for how long. Guidelines for duration of post-anaphylaxis monitoring vary, are based on limited evidence, and can have unintended negative impacts on patient safety, quality of life, and healthcare resources. The objectives of this study are to derive a prognostic model for BA and to develop a risk-scoring system that informs disposition decisions of children who present to emergency departments (ED) with anaphylaxis.

**Methods and Analysis**

This prospective multi-centre cohort study will enroll 1,682 patients from seven pediatric EDs that are members of the Pediatric Emergency Research Canada network. We will enroll patients younger than 18 years of age with an allergic reaction meeting anaphylaxis diagnostic criteria. Trained ED research assistants will screen, obtain consent, and prospectively collect study data. Research assistants will follow patients during their ED visit and ascertain, in conjunction with the medical team, if the patient develops BA. A standardized follow-up survey conducted following study enrollment will determine if a biphasic reaction occurred after ED disposition. Model development will conform to the broad principles of the PROGRESS (Prognosis Research Strategy) framework and reporting will follow the TRIPOD Statement.

### **Ethics and Dissemination**

All sites will obtain institutional Research Ethics Board approval. Our dissemination plan focuses on informing clinicians, policy-makers, and parents of the results through publication in peer-reviewed journals and broadcasting on multiple media platforms.

### **Registration Details**

ClinicalTrials.gov (NCT05135377).

For peer review only



**Article Summary:**

Strengths and limitations of this study:

- 1) Largest prospective cohort study on pediatric biphasic anaphylaxis conducted to-date.
- 2) Sample size calculation and statistical analysis plan are based on the highest methodological standard for prediction modelling research.
- 3) We established an international, multidisciplinary expert team encompassing pediatrics, emergency medicine, allergy/immunology, research methodology and statistics, and knowledge translation.
- 4) We instituted an advisory council of external parents, youth, and clinicians end-users and community partners to monitor milestones, identify potential barriers and enablers for future implementation, and guide future decision aid tools.
- 5) This study is not designed to generalize our findings to settings outside of an academic pediatric emergency department; this limitation may be mitigated when we yield a clinically useful and statistically sensitive model that may be externally validated.

## INTRODUCTION:

Anaphylaxis is the most severe form of allergic reaction that rapidly affects multiple body systems and can be fatal.[1,2] The highest incidence is in children and adolescents.[3–8] In Canada, approximately every 10 minutes, there is an Emergency Department (ED) visit for food allergy.[9,10] Up to 80% of anaphylactic reactions in children are triggered by food,[11] and 8% of allergy-related ED visits are due to anaphylactic shock.[3]

According to the Canadian Institute for Health Information, the rate of children visiting Ontario and Alberta EDs for anaphylaxis more than doubled between 2007 and 2014.[3] Among 13- to 17-year-olds, ED visits increased significantly (from 23/100,000 in 2007 to 59/100,000 in 2014). The highest annual rate of ED visits was among children aged 4 and younger.[3] Similarly, the Cross-Canada Anaphylaxis Registry reported a steady increase in pediatric ED visits: from 1.8/1000 in 2011 to 4.5/1000 in 2015.[10,12] These estimates are higher than data from the US and Europe.[13,14]

As the volume of anaphylaxis-related ED visits continues to rise,[10,12] ambiguity in how physicians manage anaphylaxis increases the healthcare burden and may contribute to ED crowding. Current Canadian and international guidelines recommend that all patients with anaphylaxis present to the ED, and after initial reactions have been treated, remain there for a prolonged period to be monitored for biphasic anaphylaxis (BA, also called delayed or late-phase anaphylaxis).[15–17] BA is a second wave of symptoms after initial resolution.[18,19] The reported incidence of this potentially serious phenomenon varies from 10-20%; the majority occur within 1-24 hours from onset of the initial reaction.[16–47] The dilemma for ED

1  
2  
3 physicians is to determine which patients should be observed and the optimum duration of  
4 observation.[48] Guidelines for post-anaphylaxis care vary,[1,16,17] are based on poor or little  
5 evidence, and have negative impacts on patient safety and quality of life.[18,36,49,50] This  
6 clinical uncertainty originates from the lack of validated clinical predictors for BA.  
7  
8 Consequently, many children are hospitalized or undergo prolonged monitoring in the ED after  
9 resolution of initial anaphylaxis.[50,51]  
10  
11

12  
13  
14  
15  
16  
17  
18  
19 In the United States, ED care and hospitalizations are the largest drivers of annual direct medical  
20 costs (\$1.9 billion) for food allergic children.[52] The incremental cost of extended ED  
21 observation of resolved anaphylaxis (6 hours versus 1 hour) is \$62,374 USD per case of BA  
22 identified (\$68,411 USD from the societal perspective). ED monitoring beyond 6 hours of  
23 patients who quickly stabilize after treatment is associated with an incremental cost-effectiveness  
24 ratio of \$230,202 per case observed (societal perspective).[53] As ED crowding and visits for  
25 anaphylaxis increase, current post-anaphylaxis clinical practice is neither sustainable nor cost-  
26 effective.[29]  
27  
28  
29  
30  
31  
32  
33  
34  
35  
36  
37  
38  
39

40 Providing the best evidence-based value care at the lowest cost is critical to optimize resource  
41 stewardship and eliminate wasteful spending in healthcare. In alignment with national and  
42 international research priorities,[54–58] our goal is to derive a prognostic clinical prediction  
43 model that identifies children with anaphylaxis who are at heightened risk of BA. This model  
44 will address a gap in current knowledge and practice, with anticipated benefits for patient care  
45 and health system efficiency worldwide.  
46  
47  
48  
49  
50  
51  
52  
53  
54  
55  
56  
57  
58  
59  
60

## METHODS AND ANALYSIS:

### Study Design

We will conduct a prospective multi-centre cohort study. Prospective data collection is necessary to minimize research waste in prediction modelling, accurately assess the risk and impact of BA on patients and the healthcare system, and derive a clinically useful prediction rule. Our design ensures consistency and precision of data collection of all clinically relevant potential predictors and enables accurate assessment of critical outcomes. Our methods follow established guidelines for developing clinical prediction rules.[59–68] We conform to the PROGRESS (Prognosis Research Strategy) methods of prediction modelling.[66,69–71]

### Study Population

All children aged 0–17 years who present to a participating ED will be screened for study enrollment based on the following criteria:

### Inclusion Criteria

1. Age < 18 years
2. Presenting to ED with an allergic reaction that matches diagnostic criteria for anaphylaxis as defined by the World Allergy Organization (WAO) in 2019.[72] *Anaphylactic reaction* is a multi-system allergic reaction characterized by one or more clinical features involving the respiratory or cardiovascular systems and associated with one or more clinical features involving the skin or gastrointestinal tract. These criteria are universally accepted and endorsed by most international allergy and emergency medicine

1  
2  
3 organizations.[15,54,73] The 2019 WAO guidelines clarify the involvement of two organ  
4 systems is not always requisite for diagnosis: "Although the diagnosis of anaphylaxis  
5 usually depends on the involvement of multiple organ systems, anaphylaxis may present  
6 as an acute cardiac or respiratory event as the only manifestation of anaphylaxis." [72]  
7  
8 Thus, an individual with isolated hypotension, bronchospasm, or upper airway  
9 obstruction after exposure to a known or potential trigger will be deemed to have  
10 anaphylaxis, even if typical skin features are absent.[72,74]  
11  
12  
13  
14  
15  
16  
17  
18

- 19 3. Language proficiency in English or French  
20  
21  
22  
23

### 24 **Exclusion Criteria**

- 25  
26 1. Anaphylactic reaction that occurred in the context of a suicidal attempt or intoxication.  
27  
28 2. Anaphylactic reaction that began in hospital and managed outside the ED (inpatient or  
29 outpatient unit)  
30  
31 3. Inability or unwillingness of individual and/or caregiver to complete the follow-up  
32 surveys post ED discharge.  
33  
34  
35  
36  
37  
38  
39

### 40 **Study Setting**

41  
42 The study will enrol participants in EDs from seven hospitals: CHU Sainte-Justine, Children's  
43 Hospital of Eastern Ontario, Hospital for Sick Children, McMaster Children's Hospital,  
44 Children's Hospital – London Health Sciences Centre, Alberta Children's Hospital, and Stollery  
45 Children's Hospital. These EDs are members of Pediatric Emergency Research Canada (PERC;  
46 <https://www.perc-canada.ca>)[75]. Research staff will follow site-specific Research Ethics  
47  
48  
49  
50  
51  
52  
53  
54  
55  
56  
57  
58  
59  
60

Boards' (REB) guidelines for approaching potential participants and families for research studies, screening for eligibility, and obtaining consent.

## Outcome

The primary outcome is development of BA. As per the recently published consensus definition,[76] to be classified as BA, an anaphylactic reaction must meet three criteria: 1) initial anaphylactic reaction followed by resolution of all initial manifestations for  $\geq 1$  hour, with no new symptoms or treatment administered in that time; 2) second phase of new or recurrent symptoms or signs that meet the consensus definition of anaphylaxis occurring within 1-48 hours from complete resolution of initial symptoms or signs; and 3) new or recurrent symptoms or signs not caused by antigen re-exposure.[35] We will capture any new or recurrent symptoms or signs, but only clinical manifestations that meet diagnostic criteria for anaphylaxis will be defined as **anaphylactic biphasic responses**. This definition focuses on *clinically important* or major biphasic reactions.[29,30] Mild symptoms that involve only the skin (e.g., urticarial rash) will be captured and classified as minor biphasic responses, but they do not meet our case definition for BA.

## Data collection in ED

A research assistant (RA) or research nurse (RN) in the ED will approach potential participants to screen for eligibility and provide a study overview. When the pre-screen has been completed, the RA/RN will consult with the attending physician to confirm that the symptoms are consistent with anaphylaxis. If the attending physician considers the signs and symptoms to be more in line with another diagnosis (e.g., gastroenteritis), the patient will be excluded. After confirming

participant eligibility, the RA/RN will obtain written informed consent (and assent as appropriate) and proceed with data collection. Table 1 lists the independent variables that will be collected.

**Table 1:** Data collection variables

|                                                                       |                                                                                                                                                                                                                                                                                                                                                                                                                                                                                                                                                                                             |
|-----------------------------------------------------------------------|---------------------------------------------------------------------------------------------------------------------------------------------------------------------------------------------------------------------------------------------------------------------------------------------------------------------------------------------------------------------------------------------------------------------------------------------------------------------------------------------------------------------------------------------------------------------------------------------|
| <b>From clinical history</b>                                          | <ul style="list-style-type: none"> <li>• Demographics: age, sex, date of birth, and self-identified race</li> <li>• Past medical history (e.g., cardiac disease, bronchial asthma, eczema)</li> <li>• Previous ED visits for anaphylaxis</li> <li>• Current anaphylaxis augmenting factors (e.g., physical exercise, viral illness or fever, menses in female, drugs such as non-steroidal anti-inflammatory drugs (NSAID), antacid, <math>\beta</math>-blockers, and ACE inhibitors)</li> <li>• Allergen trigger (e.g., type, time of exposure and onset of symptoms, location)</li> </ul> |
| <b>From physical examination</b>                                      | <ul style="list-style-type: none"> <li>• Participant weight</li> <li>• Vital signs at triage (heart rate, respiratory rate, blood pressure, and oxygen saturation)</li> <li>• Triage score (based on Canadian Pediatric Triage and Acuity Scale)</li> <li>• Physical exam findings upon arrival at ED</li> </ul>                                                                                                                                                                                                                                                                            |
| <b>From pre-hospital and initial ED intervention, and disposition</b> | <ul style="list-style-type: none"> <li>• Treatment interventions (e.g., epinephrine, bronchodilators, etc.) received before arrival at ED and during transport by paramedics (if applicable)</li> <li>• Non-pharmacologic/supportive interventions (such as intubation and intravenous fluids) and timeline</li> <li>• Pharmacologic interventions (including dose, route, frequency, and time administered)</li> <li>• Disposition time, location (home or hospitalization), list of discharge medications, and outpatient allergy referral</li> </ul>                                     |
| <b>From ED monitoring period</b>                                      | <ul style="list-style-type: none"> <li>• Presence and description of new/recurrent symptoms/signs</li> <li>• Time of new recurring symptoms/signs</li> <li>• Management interventions given for biphasic reaction</li> </ul>                                                                                                                                                                                                                                                                                                                                                                |
| <b>From follow-up email/phone call after ED disposition</b>           | <ul style="list-style-type: none"> <li>• Presence and description of new/recurrent symptoms/signs</li> <li>• Time of new/recurrent symptoms/signs</li> <li>• Management interventions given for biphasic reaction, including visits to ED/primary care providers</li> </ul>                                                                                                                                                                                                                                                                                                                 |
| <b>From 6-month follow-up (if applicable)</b>                         | <ul style="list-style-type: none"> <li>• If patient was seen by Allergist</li> <li>• If seen by Allergist, was allergic agent identified?</li> </ul>                                                                                                                                                                                                                                                                                                                                                                                                                                        |

1  
2  
3 The RA/RN will review the physical exam findings with the clinical team (treating ED  
4 physician/bedside nurse). Because anaphylaxis is a clinical diagnosis, participants or caregivers  
5 will be asked about the spectrum of symptoms and signs experienced before and upon arrival in  
6 the ED. The RN/RA will verbally administer a structured questionnaire to participants or  
7 caregivers to collect demographics, medical history, risk factors, reaction characteristics, and  
8 symptoms. Information from the participant and from the medical record about treatment before  
9 and after ED arrival, and biphasic anaphylaxis events during the ED monitoring period, will by  
10 captured by the RN/RA. Missing data will be obtained by questioning the participant, caregiver,  
11 or treating ED team. To capture all BA events and ascertain symptom recurrence while  
12 participants are being monitored, the research RN/RA will follow the participant/caregiver  
13 throughout the ED visit. Events occurring outside study team hours will be captured in the  
14 follow-up questionnaire.  
15  
16  
17  
18  
19  
20  
21  
22  
23  
24  
25  
26  
27  
28  
29  
30  
31  
32

### 33 **First follow-up after ED discharge or hospital admission**

34  
35 Published data have reported symptom recurrence up to 48 hours from anaphylaxis onset.[28,44]  
36  
37 We will contact participants by telephone or email 2-5 days after enrollment to complete a  
38 standardized questionnaire that will capture the nature and timing of new and recurrent  
39 symptoms or signs, follow-up with health providers, return ED visits, and treatments received.  
40  
41 Events that took place in-hospital, but were not previously captured by the study team (e.g.,  
42 outside study team hours), will be verified from the participant's medical chart.  
43  
44  
45  
46  
47  
48  
49  
50  
51  
52  
53  
54  
55  
56  
57  
58  
59  
60



### **Second follow-up after ED discharge or hospital admission**

Participants whose anaphylaxis trigger or culprit allergen was unknown at the time of study enrollment will be contacted 6-9 months after enrollment. We will determine if the participant had been assessed by an allergy specialist in the interim, and if so, whether an allergic agent had been identified.

### **Strategies for retention**

For the follow-up survey, the families of participants will be asked: (1) their preferred mode of contact (email or telephone), and (2) the best time to reach them and contact number. Based on their preferences, we will send the follow-up questionnaire as an automated REDCap survey to the parent/caregiver email address or administer the survey by telephone. If the e-survey is not completed within 24 hours, a second email will be sent. If there is no response to a second email, experienced staff will contact the participant for a telephone interview. A similar schedule of repeat calls will be used to reach those who selected telephone follow-up.

### **Sample Size**

Based on our earlier research and estimates from well-designed adult and pediatric studies,[28,35] 10% is a conservative of the population-wide event rate for BA. Our systematic reviews of potential predictors [77] and other relevant studies identified 19 potential predictive variables.[78] Recent *BMJ* and *Stat in Med* articles offer practical guidance for calculating the sample size required for the development of clinical prediction models.[79,80] Following these guidelines, we considered sample size from four perspectives, with the largest being selected as the sample size needed. The four calculations are based on: the approximate 95% confidence

1  
2  
3 interval for the overall outcome proportion 0.10 in the study population (calculated sample size  
4 needed n=139); the mean absolute prediction error of the average error in the model's outcome  
5 (n=274); achievement of an expected uniform shrinkage factor of  $\leq 10\%$  (n=1,529); and ensuring  
6 a small, expected optimism in the apparent proportion of overall variation explained R<sup>2</sup> (n=719).  
7  
8 Details of these calculations with the selection of the parameter estimates and sensitivity  
9 considerations are provided in **Supplementary Material A**. Taking the largest sample size that  
10 meets all four criteria, we need to enroll 1,529 participants with anaphylaxis. Based on previous  
11 studies by our network, we anticipate 10% loss to follow-up.[81,82] Thus, our estimated sample  
12 size is 1,682 participants.  
13  
14  
15  
16  
17  
18  
19  
20  
21  
22  
23  
24  
25

### 26 **Dependent Predictors Selection for Analysis**

27  
28 Table 2 lists the 19 candidate-dependent predictors that we will include in the analysis. We chose  
29 these 19 variables based on clinical studies of predictors of BA by our team and by others,[16–  
30 47] two systematic reviews,[77,83] the meta-analysis from the 2020 anaphylaxis practice  
31 parameter,[84] and clinical experience. These predictors encompass recently published BA  
32 predictors from the European Anaphylaxis Registry retrospective data.[85] Given the direct  
33 association between initially severe anaphylaxis and subsequent BA, we also include risk factors  
34 of severe anaphylaxis.[86]  
35  
36  
37  
38  
39  
40  
41  
42  
43  
44  
45  
46  
47  
48  
49  
50  
51  
52  
53  
54  
55  
56  
57  
58  
59  
60

**Table 2:** Candidate-dependent predictors that will be included in the analysis for primary objective of study, based on previous clinical studies on BA predictors

| Allergen predictors                                                                                                                                                         | Patient predictors                                                                  |
|-----------------------------------------------------------------------------------------------------------------------------------------------------------------------------|-------------------------------------------------------------------------------------|
| Peanut trigger [85]                                                                                                                                                         | Age [34,35,38,86]                                                                   |
| Venom trigger [86]                                                                                                                                                          | Male sex [86,87]                                                                    |
| Drug trigger [11,78,84,86–89]                                                                                                                                               | Previous anaphylaxis [31,36,39]                                                     |
| Unknown trigger [31,39,83–85]                                                                                                                                               | Pre-existing asthma or chronic lung disease [26,28,42,47,86,87,89]                  |
| ≥30 min from exposure to trigger to onset of symptoms [43,85]                                                                                                               | Exercise as co-factor for anaphylaxis [1,86,90–93]                                  |
| Disease predictors                                                                                                                                                          | Treatment predictors                                                                |
| Signs of severe anaphylaxis* [22,23,25,27,34,38,83,84,94]                                                                                                                   | Treatment of initial reaction with >1 dose of epinephrine [22,23,35,42,45,46,84,95] |
| Wide pulse pressure [84,95]                                                                                                                                                 | Treatment of initial reaction with epinephrine [34,35,44,96]                        |
| Respiratory distress or wheezing [31,35,97]                                                                                                                                 | Systemic steroids [44,84]                                                           |
| Gastrointestinal manifestations [83,85]                                                                                                                                     | Epinephrine administration >60 min from onset of reaction [20,26,35,39,98,99]       |
| Cutaneous manifestations [69, 73]                                                                                                                                           |                                                                                     |
| *Include (as defined by Brown's severity grading score)[100]: cyanosis or SpO <sub>2</sub> ≤ 92%, hypotension, confusion, collapse, loss of consciousness, or incontinence. |                                                                                     |

## Data analysis

Descriptive analysis will be used to summarize baseline participant demographics, anaphylaxis clinical manifestations, and management characteristics. Although race and indigenous status will be collected as demographic characteristics, we will not perform race-based analysis; these variables will be used as descriptors to demonstrate the diversity and representativeness of our sample.

Multivariable regression analysis will be used to derive a predictive model for BA. As recommended by Royston *et al.*[101], our modelling strategy will follow six steps.

- 1  
2  
3 1) *Evaluate data quality.* Predictors found to be complete (<10% missing data) will be used in a  
4 full model approach. Missing data will be considered Missing at Random. If any potential  
5 predictor has >10% missing value, a multiple imputation procedure will be followed to  
6 replace these values.[61,64] If >50% data are missing, the variable will be omitted from the  
7 analysis.  
8  
9
- 10  
11 2) *Handle and model continuous predictors.* To maximize the predictive ability of the  
12 regression model, we will maintain continuous variables such as age.[102,103] A  
13 multivariable fractional polynomial procedure will be used to identify and model nonlinear  
14 continuous variables. Our a priori categorization of some originally continuous predictors,  
15 such as “time to epinephrine treatment,” is based on plausible clinical and basic science  
16 research [77,104,105] and recent regression analysis.[39]  
17  
18
- 19 3) *Develop final model (predictor selection).* Predictors that match the above two criteria will be  
20 entered in a “full model” that contains the main effects of all candidate predictors. The  
21 objective of predictors reduction is to find the best combinations of variables for accurate  
22 prediction (low mean squared error) in a model that is easy for clinicians to use and that  
23 contains as few variables as possible. Therefore, we will assess for collinearity and use  
24 shrinkage technique as a method of variable reduction.[68] Collinearity between predictors  
25 will be evaluated with correlation coefficient (r) and variance inflation factors (VIF), which  
26 measure the degree to which collinearity degrades the precision of estimate coefficients.  
27 Strongly correlated predictors ( $r > 0.8$ , or  $VIF > 10$ ) will be combined in a single variable. In  
28 accordance with Harrell and Steyerberg, we will use Penalized maximum likelihood (PML)  
29 estimation to perform shrinkage reduction (reduction of the regression coefficients to  
30 improve prediction quality). Maximizing a modified Akaike's Information Criterion will be  
31  
32  
33  
34  
35  
36  
37  
38  
39  
40  
41  
42  
43  
44  
45  
46  
47  
48  
49  
50  
51  
52  
53  
54  
55  
56  
57  
58  
59  
60

1  
2  
3 used to choose the optimal penalty factor for PML and select the best model. This approach  
4 includes a penalty against large models to deal with the trade-off between overfitting and  
5 model simplicity.[101] The added benefit of this approach is that we could use more penalty  
6 factor if we found significant interaction.  
7  
8  
9  
10  
11

12 4) *Assess model performance with three measures* [64,106,107]  
13

- 14 a. *Calibration* refers to the accuracy of absolute risk estimates.[106] Model  
15 calibration will be assessed by calibration slope, and graphically, by locally  
16 weighted scatterplot smoothing (LOESS) plots of observed versus predicted  
17 probabilities of the outcome. The slope of the calibration curve is a measure of  
18 over-optimism of the model predictions.  
19  
20 b. *Discrimination* will be assessed by the receiver operating characteristics curve  
21 and the concordance (C) index, which measures how well the model discriminates  
22 between participants with and without BA.  
23  
24 c. *Clinical usefulness* of the prediction model will be assessed using net benefit as a  
25 decision analytic.[107,108] The derived prediction rule will be cross-validated by  
26 comparing the classification of each participant with their actual primary outcome  
27 status.  
28  
29  
30  
31  
32  
33  
34  
35  
36  
37  
38  
39  
40  
41

42 5) *Validate model*  
43

- 44 i. *Internal validation.* Recruiting from geographically separated sites enhances  
45 generalizability and supports internal validation of the model.[61,109,110] To correct  
46 for overfitting and quantify optimism in model performance, our model will be  
47 validated internally using bootstrapping through the following steps: [102,111,112]  
48  
49  
50  
51  
52  
53  
54  
55  
56  
57  
58  
59  
60

1  
2  
3 1) After developing the prediction model using the entire original sample and  
4 determining apparent performance, we will generate a bootstrap sample by sampling  
5 individuals with replacement from the original sample; 2) Develop a model using the  
6 bootstrap sample (applying the same modelling and predictor selection in step 3 above);  
7  
8 3) Determine the apparent bootstrap performance of this model (performance of  
9 bootstrap model in the original sample and calculate the optimism as the difference  
10 between bootstrap performance and test performance); 4) Repeat steps 1 through 3 at  
11 least 500 times; and 5) Average the estimates of optimism in step 4, and subtract the  
12 value from the apparent performance obtained in step 1 to obtain an optimism-corrected  
13 estimate of performance.  
14  
15  
16  
17  
18  
19  
20  
21  
22  
23  
24  
25

26 ii. *External validation*: Before broad clinical implementation, our derived rule requires  
27 external validation. Lack of external validation is a limitation of many clinical  
28 prediction models.[77,113] For two reasons, this proposal focuses only on model  
29 derivation: 1) Requesting funding for external validation may be premature. Before  
30 embarking on external validation, we need proof that our *a priori* risk factors yield a  
31 clinically useful and statistically sensitive model. 2) The validation phase should be  
32 broader, in different settings, with other participants, and with different  
33 clinicians.[114,115] Our ultimate goal is to validate our model and risk score in an  
34 international setting. Such validation is feasible because PERC is a member of the  
35 Pediatric Emergency Research Networks (PERN), and member networks have a history  
36 of collaboration.[81,82,116]  
37  
38  
39  
40  
41  
42  
43  
44  
45  
46  
47  
48  
49  
50

51 6) *Present model*. As described by Sullivan *et al.*[117], we will use the regression coefficient in  
52 our final fitted model to generate a clinical decision rule that enables point-of-care risk  
53  
54  
55  
56  
57  
58  
59  
60

1  
2  
3 assessment of BA. To develop a points score system, we will follow the steps described in a  
4 recent *BMJ* paper: [118] 1) Multiply and round regression coefficients of binary predictors;  
5  
6 2) Search for score for continuous predictors to determine the difference in regression units;  
7  
8 3) Estimate multiplication factor for the scores; 4) Use decision curve analysis to assign  
9  
10 participants to risk groups and quantify any deterioration in discriminative performance; and  
11  
12 5) Present accompanying table of probabilities to allow points score to be translated into a  
13  
14 predicted risk. The anticipated stoplight scoring system (green=low→discharge;  
15  
16 yellow=moderate→monitor in ED/preference-sensitive care; red=high→admit to hospital)  
17  
18 will inform evidence-based disposition decisions by clinicians and anticipatory guidance to  
19  
20 families.  
21  
22  
23  
24  
25  
26  
27  
28

### 29 **Patient and Public Involvement**

30  
31 Patients and/or the public were involved in the design and dissemination plans for this research.  
32  
33 To promote uptake of our results, potential knowledge users have been and will be engaged  
34  
35 throughout the project.[119] We have a multi-phase approach to maximize collaboration and  
36  
37 opportunities for diverse knowledge users to interact at various research phases.[120] Our multi-  
38  
39 site team includes ED clinicians as typical end-users and champions for future implementation.  
40  
41 We have established an advisory council of external end-users (parents, youth, ED clinicians)  
42  
43 and community partners (Food Allergy Canada, Canadian Society of Allergy & Clinical  
44  
45 Immunology) to monitor milestones, identify potential barriers and enablers for future  
46  
47 implementation, and guide future decision aids study. The leadership team at Food Allergy  
48  
49 Canada has reviewed and supports this proposal. To improve study operation and minimize the  
50  
51  
52  
53  
54  
55  
56  
57  
58  
59  
60

1  
2  
3 burden on patients and families, we sought feedback from the Patients and Families Advisory  
4  
5 Committee at the Children's Hospital of Eastern Ontario Research Institute.  
6  
7  
8  
9

## 10 **ETHICS AND DISSEMINATION:**

### 11 **Ethics**

12  
13  
14  
15  
16  
17 Approval will be obtained from ethics boards at all recruiting centers. Ethics approval has been  
18  
19 received from Clinical Trials Ontario (CTO 3721) for the hospitals in Ontario. Written informed  
20  
21 consent, and/or assent when appropriate, will be obtained from all participants or legal guardians.  
22  
23  
24  
25

26 The study is registered at ClinicalTrials.gov (NCT05135377). Results information from this  
27  
28 study will be submitted to ClinicalTrials.gov.  
29  
30  
31  
32

### 33 **End-of-grant KT (Knowledge Translation)**

34  
35 ED personnel, providers, allergists, clinical researchers, administrators, and government policy-  
36  
37 makers can use our study outputs to improve healthcare delivery. KT will focus on informing  
38  
39 clinicians, other key user groups, and parents and participants. Our plan has three goals: increase  
40  
41 knowledge awareness, inform/change practice, and inform future research.[121,122]  
42  
43  
44  
45  
46

47 We have a powerful infrastructure to disseminate our results. Study investigators are senior  
48  
49 members of PERC and PERN, networks that include pediatric ED researchers worldwide (>100  
50  
51 hospitals across 6 PERN networks)[123], practicing clinicians, medical educators, and healthcare  
52  
53 administrators. PERC is closely tied to the TREKK (Translating Emergency Research  
54  
55  
56  
57  
58  
59  
60



1  
2  
3 Knowledge for Kids) Network of Centres of Excellence,[124] a partnership for knowledge  
4 exchange between general EDs and PERC sites. Our reporting/publication of the study results  
5 will conform to the Transparent Reporting of a Multivariable Prediction Model for Individual  
6 Prognosis or Diagnosis (TRIPOD) checklist.[112]  
7  
8  
9  
10  
11  
12  
13  
14  
15  
16  
17  
18  
19  
20  
21  
22  
23  
24  
25  
26  
27  
28  
29  
30  
31  
32  
33  
34  
35  
36  
37  
38  
39  
40  
41  
42  
43  
44  
45  
46  
47  
48  
49  
50  
51  
52  
53  
54  
55  
56  
57  
58  
59  
60

For peer review only

**ACKNOWLEDGEMENTS:**

We are grateful to the Patients and Family Advisory Committee at the Children's Hospital of Eastern Ontario Research Institute, and Food Allergy Canada for the insightful comments and feedback on the recruitment approach and data collection forms. We are also grateful to the following research coordinators and research managers for the operational support of the study at their institutions: Candice McGahern, Jena Shank, Judith Sweeney, Kamary Coriolano DaSilva, Patricia Candelaria, Redjana Carciumaru, and Stéphanie Pellerin.

**COMPETING INTERESTS STATEMENT:**

All authors have read and understood BMJ policy on declaration of interests and have no relevant interest to declare. Dr Amy C. Plint is supported by a Tier I University of Ottawa Research Chair. Dr. Stephen Freedman is supported by the Alberta Children's Hospital Professorship in Child Health and Wellness.

For peer review only

**FUNDING STATEMENT:**

This work is supported by the Canadian Institutes of Health Research (CIHR), grant number PJT-175057. This work is also supported by the Children's Hospital Academic Medical Organization (CHAMO) Innovation Fund, grant number N/A.

For peer review only

**AUTHORS' CONTRIBUTIONS:**

WA and ACP conceived the study idea. WA, ACP, and MS wrote the protocol with input from all authors. All authors provided input into the methodology and analysis plan. All authors approved the final protocol manuscript. ACP and GW are the supervisors of the study.

For peer review only

1  
2  
3  
4  
5  
6  
7  
8  
9  
10  
11  
12  
13  
14  
15  
16  
17  
18  
19  
20  
21  
22  
23  
24  
25  
26  
27  
28  
29  
30  
31  
32  
33  
34  
35  
36  
37  
38  
39  
40  
41  
42  
43  
44  
45  
46  
47  
48  
49  
50  
51  
52  
53  
54  
55  
56  
57  
58  
59  
60

## REFERENCES:

- 1 Simons FER, Arduzzo LRF, Bilò MB, *et al.* World allergy organization guidelines for the assessment and management of anaphylaxis. *World Allergy Organ J* 2011;**4**:13–37.
- 2 Castells M. Diagnosis and management of anaphylaxis in precision medicine. *J Allergy Clin Immunol* 2017;**140**:321–33.
- 3 CIHI. Anaphylaxis and Allergy in the Emergency Department. 2015.[https://secure.cihi.ca/free\\_products/Anaphylaxis\\_Infosheet\\_en.pdf](https://secure.cihi.ca/free_products/Anaphylaxis_Infosheet_en.pdf) (accessed 18 Dec 2015).
- 4 Sheikh A, Hippisley-Cox J, Newton J, *et al.* Trends in national incidence, lifetime prevalence and adrenaline prescribing for anaphylaxis in England. *J R Soc Med* 2008;**101**:139–43.
- 5 Wood RA, Camargo Jr CA, Lieberman P, *et al.* Anaphylaxis in America: the prevalence and characteristics of anaphylaxis in the United States. *J Allergy Clin Immunol* 2014;**133**:461–7.
- 6 Tejedor-Alonso MA, Moro-Moro M, Múgica-García M V. Epidemiology of Anaphylaxis: Contributions From the Last 10 Years. *J Investig Allergol Clin Immunol* 2015;**25**:163–75.
- 7 Simons FER, Sampson HA. Anaphylaxis epidemic: fact or fiction? *J Allergy Clin Immunol* 2008;**122**:1166–8.
- 8 Lieberman P, Camargo Jr CA, Bohlke K, *et al.* Epidemiology of anaphylaxis: findings of the American college of allergy, asthma and immunology epidemiology of anaphylaxis working group. *Ann Allergy, Asthma Immunol* 2006;**97**:596–602.
- 9 Statistics Canada. The Impact on Emergency Department Utilization of the CFHI Healthcare Collaborations and Initiatives. 2013.[https://www.cfhi-fcass.ca/sf-docs/default-source/reports/risk-analytica.pdf?sfvrsn=bd41df44\\_2](https://www.cfhi-fcass.ca/sf-docs/default-source/reports/risk-analytica.pdf?sfvrsn=bd41df44_2)
- 10 Hochstadter E, Clarke A, De Schryver S, *et al.* Increasing visits for anaphylaxis and the benefits of early epinephrine administration: a 4-year study at a pediatric emergency department in Montreal, Canada. *J Allergy Clin Immunol* 2016;**137**:1888.
- 11 Gabrielli S, Clarke A, Morris J, *et al.* Evaluation of prehospital management in a Canadian emergency department anaphylaxis cohort. *J Allergy Clin Immunol Pract* 2019;**7**:2232–8.
- 12 Lee AYM, Enarson P, Clarke AE, *et al.* Anaphylaxis across two Canadian pediatric centers: evaluating management disparities. *J Asthma Allergy* 2017;**10**:1.
- 13 Motosue MS, Bellolio MF, Van Houten HK, *et al.* National trends in emergency department visits and hospitalizations for food-induced anaphylaxis in US children. *Pediatr Allergy Immunol* 2018;**29**:538–44.
- 14 Grabenhenrich LB, D'Almeida S, Moneret-Vautrin A, *et al.* Anaphylaxis in children and adolescents: The European Anaphylaxis Registry. *J Allergy Clin Immunol* 2016;**137**:1128–1137.e1. doi:10.1016/j.jaci.2015.11.015
- 15 Canadian Society of Allergy and Clinical Immunology. Anaphylaxis in Schools & Other Settings. 2016.<http://csaci.ca/wp-content/uploads/2017/11/Anaphylaxis-in-Schools-Other-Settings-> (accessed 10 Dec 2016).
- 16 Lieberman P, Nicklas RA, Randolph C, *et al.* Anaphylaxis—a practice parameter update 2015. *Ann Allergy, Asthma Immunol* 2015;**115**:341–84.
- 17 Muraro A, Roberts G, Worm M, *et al.* Anaphylaxis: guidelines from the European Academy of Allergy and Clinical Immunology. *Allergy* 2014;**69**:1026–45.
- 18 Lieberman P. Biphasic anaphylactic reactions. *Ann allergy, asthma Immunol*

- 2005;**95**:217–26.
- 19 Tole JW, Lieberman P. Biphasic anaphylaxis: review of incidence, clinical predictors, and observation recommendations. *Immunol Allergy Clin North Am* 2007;**27**:309–26.
- 20 Lertnawapan R. Anaphylaxis and biphasic phase in Thailand: 4-year observation. *Allergol Int* 2011;**60**:283–9.
- 21 Orhan F, Canitez Y, Bakirtas A, *et al.* Anaphylaxis in Turkish children: a multi-centre, retrospective, case study. *Clin Exp Allergy* 2011;**41**:1767–76.
- 22 Inoue N, Yamamoto A. Clinical evaluation of pediatric anaphylaxis and the necessity for multiple doses of epinephrine. *Asia Pac Allergy* 2013;**3**:106–14.
- 23 Lee J, Garrett JP-D, Brown-Whitehorn T, *et al.* Biphasic reactions in children undergoing oral food challenges. In: *Allergy & Asthma Proceedings*. 2013.
- 24 Nagano C, Ishiguro A, Yotani N, *et al.* Anaphylaxis and biphasic reaction in a children hospital. *Alerugi=[Allergy]* 2013;**62**:163–70.
- 25 Vezir E, Erkoçoğlu M, Kaya A, *et al.* Characteristics of anaphylaxis in children referred to a tertiary care center. In: *Allergy & Asthma Proceedings*. 2013.
- 26 Sampson HA, Mendelson L, Rosen JP. Fatal and near-fatal anaphylactic reactions to food in children and adolescents. *N Engl J Med* 1992;**327**:380–4.
- 27 Liew WK, Chiang WC, Goh AEN, *et al.* Paediatric anaphylaxis in a Singaporean children cohort: changing food allergy triggers over time. *Asia Pac Allergy* 2013;**3**:29–34.
- 28 Brown SGA, Stone SF, Fatovich DM, *et al.* Anaphylaxis: clinical patterns, mediator release, and severity. *J Allergy Clin Immunol* 2013;**132**:1141–9.
- 29 Grunau BE, Li J, Yi TW, *et al.* Incidence of clinically important biphasic reactions in emergency department patients with allergic reactions or anaphylaxis. *Ann Emerg Med* 2014;**63**:736–44.
- 30 Rohacek M, Edenhofer H, Bircher A, *et al.* Biphasic anaphylactic reactions: occurrence and mortality. *Allergy* 2014;**69**:791–7.
- 31 Lee S, Bellolio MF, Hess EP, *et al.* Predictors of biphasic reactions in the emergency department for patients with anaphylaxis. *J Allergy Clin Immunol Pract* 2014;**2**:281–7.
- 32 Oya S, Nakamori T, Kinoshita H. Incidence and characteristics of biphasic and protracted anaphylaxis: evaluation of 114 inpatients. *Acute Med Surg* 2014;**1**:228–33.
- 33 Sricharoen P, Sittichanbuncha Y, Wibulpolprasert A, *et al.* What clinical factors are associated with biphasic anaphylaxis in Thai adult patients? *Asian Pacific J Allergy Immunol* 2015;**33**:8.
- 34 Manuyakorn W, Benjaponpitak S, Kamchaisatian W, *et al.* Pediatric anaphylaxis: triggers, clinical features, and treatment in a tertiary-care hospital. *Asian Pac J Allergy Immunol* 2015;**33**:281–8.
- 35 Alqurashi W, Stiell I, Chan K, *et al.* Epidemiology and clinical predictors of biphasic reactions in children with anaphylaxis. *Ann Allergy, Asthma Immunol* 2015;**115**:217–23.
- 36 Ko BS, Kim WY, Ryoo SM, *et al.* Biphasic reactions in patients with anaphylaxis treated with corticosteroids. *Ann Allergy, Asthma Immunol* 2015;**115**:312–6.
- 37 Douglas DM, Sukenick E, Andrade WP, *et al.* Biphasic systemic anaphylaxis: an inpatient and outpatient study. *J Allergy Clin Immunol* 1994;**93**:977–85.
- 38 Saleh-Langenberg J, Flokstra-de Blok BMJ, AlAglan N, *et al.* Late reactions in food-allergic children and adolescents after double-blind, placebo-controlled food challenges. *Allergy* 2016;**71**:1069–73.
- 39 Lee S, Peterson A, Lohse CM, *et al.* Further evaluation of factors that may predict

- biphasic reactions in emergency department anaphylaxis patients. *J Allergy Clin Immunol Pract* 2017;**5**:1295–301.
- 40 Kim T-H, Yoon SH, Lee S-Y, *et al*. Biphasic and protracted anaphylaxis to iodinated contrast media. *Eur Radiol* 2018;**28**:1242–52.
- 41 Brady Jr WJ, Lubner S, Carter CT, *et al*. Multiphasic anaphylaxis: an uncommon event in the emergency department. *Acad Emerg Med* 1997;**4**:193–7.
- 42 Popa VT, Lerner SA. Biphasic systemic anaphylactic reaction: three illustrative cases. *Ann Allergy* 1984;**53**:151–5.
- 43 Stark BJ, Sullivan TJ. Biphasic and protracted anaphylaxis. *J Allergy Clin Immunol* 1986;**78**:76–83.
- 44 Ellis AK, Day JH. Incidence and characteristics of biphasic anaphylaxis: a prospective evaluation of 103 patients. *Ann Allergy, Asthma Immunol* 2007;**98**:64–9.
- 45 Scranton SE, Gonzalez EG, Waibel KH. Incidence and characteristics of biphasic reactions after allergen immunotherapy. *J Allergy Clin Immunol* 2009;**123**:493–8.
- 46 Mehr S, Liew WK, Tey D, *et al*. Clinical predictors for biphasic reactions in children presenting with anaphylaxis. *Clin Exp Allergy* 2009;**39**:1390–6.
- 47 Confino-Cohen R, Goldberg A. Allergen immunotherapy–induced biphasic systemic reactions: incidence, characteristics, and outcome: a prospective study. *Ann allergy, asthma Immunol* 2010;**104**:73–8.
- 48 Kemp SF. The post-anaphylaxis dilemma: how long is long enough to observe a patient after resolution of symptoms? *Curr Allergy Asthma Rep* 2008;**8**:45–8.
- 49 Lee S, Sadosty AT, Campbell RL. Update on biphasic anaphylaxis. *Curr Opin Allergy Clin Immunol* 2016;**16**:346–51.
- 50 Parlamani JP, Oron AP, Uspal NG, *et al*. Emergency and hospital care for food-related anaphylaxis in children. *Hosp Pediatr* 2016;**6**:269–74.
- 51 Michelson KA, Monuteaux MC, Neuman MI. Variation and trends in anaphylaxis care in United States children’s hospitals. *Acad Emerg Med* 2016;**23**:623–7.
- 52 Gupta R, Holdford D, Bilaver L, *et al*. The economic impact of childhood food allergy in the United States. *JAMA Pediatr* 2013;**167**:1026–31.
- 53 Shaker M, Wallace D, Golden DBK, *et al*. Simulation of health and economic benefits of extended observation of resolved anaphylaxis. *JAMA Netw open* 2019;**2**:e1913951–e1913951.
- 54 Simons FER, Arduoso LRF, Bilò MB, *et al*. International consensus on (ICON) anaphylaxis. *World Allergy Organ J* 2014;**7**:9.
- 55 Sicherer SH, Allen K, Lack G, *et al*. Critical issues in food allergy: a national academies consensus report. *Pediatrics* 2017;**140**.
- 56 National Academies of Sciences and Medicine E. *Finding a path to safety in food allergy: assessment of the global burden, causes, prevention, management, and public policy*. National Academies Press 2017.
- 57 National Institute for Health and Clinical Excellence. Anaphylaxis: assessment and referral after emergency treatment | Guidance and guidelines | NICE. 2016.<https://www.nice.org.uk/guidance/cg134/chapter/4-Research-recommendations#the-frequency-and-effects-of-biphasic-reactions> (accessed 12 Dec 2016).
- 58 Bialy L, Plint AC, Freedman SB, *et al*. Pediatric Emergency Research Canada (PERC): Patient/Family-informed Research Priorities for Pediatric Emergency Medicine. *Acad Emerg Med* 2018;**25**:1365–74.



- 1  
2  
3 59 Stiell IG, Wells GA, Vandemheen K, *et al.* The Canadian CT Head Rule for patients with  
4 minor head injury. *Lancet* 2001;**357**:1391–6.
- 5 60 McGinn TG, Guyatt GH, Wyer PC, *et al.* Users' guides to the medical literature: XXII:  
6 how to use articles about clinical decision rules. *Jama* 2000;**284**:79–84.
- 7 61 Wynants L, Collins GS, Van Calster B. Key steps and common pitfalls in developing and  
8 validating risk models. *BJOG An Int J Obstet Gynaecol* 2017;**124**:423–32.
- 9 62 Reilly BM, Evans AT. Translating clinical research into clinical practice: impact of using  
10 prediction rules to make decisions. *Ann Intern Med* 2006;**144**:201–9.
- 11 63 Green SM, Schriger DL, Yealy DM. Methodologic standards for interpreting clinical  
12 decision rules in emergency medicine: 2014 update. *Ann Emerg Med* 2014;**64**:286–91.
- 13 64 Steyerberg EW, Vergouwe Y. Towards better clinical prediction models: seven steps for  
14 development and an ABCD for validation. *Eur Heart J* 2014;**35**:1925–31.
- 15 65 Steyerberg EW, Uno H, Ioannidis JPA, *et al.* Poor performance of clinical prediction  
16 models: the harm of commonly applied methods. *J Clin Epidemiol* 2018;**98**:133–43.
- 17 66 Riley R. Prognostic model research. 2020.<https://www.prognosisresearch.com/>
- 18 67 Harrell FE. *Regression modeling strategies: with applications to linear models, logistic*  
19 *regression, and survival analysis 2nd Edition*. Springer International Publishing 2015.
- 20 68 Steyerberg EW. *Clinical prediction models*. Springer 2019.
- 21 69 Riley RD, Hayden JA, Steyerberg EW, *et al.* Prognosis Research Strategy (PROGRESS)  
22 2: prognostic factor research. *PLoS Med* 2013;**10**:e1001380.
- 23 70 Steyerberg EW, Moons KGM, van der Windt DA, *et al.* Prognosis Research Strategy  
24 (PROGRESS) 3: prognostic model research. *PLoS Med* 2013;**10**:e1001381.
- 25 71 Collins GS, Reitsma JB, Altman DG, *et al.* Transparent reporting of a multivariable  
26 prediction model for individual prognosis or diagnosis (TRIPOD): the TRIPOD statement.  
27 *J Br Surg* 2015;**102**:148–58.
- 28 72 Turner PJ, Worm M, Ansotegui IJ, *et al.* Time to revisit the definition and clinical criteria  
29 for anaphylaxis? *World Allergy Organ J* 2019;**12**.
- 30 73 Campbell RL, Li JTC, Nicklas RA, *et al.* Emergency department diagnosis and treatment  
31 of anaphylaxis: a practice parameter. *Ann Allergy, Asthma Immunol* 2014;**113**:599–608.
- 32 74 Australian Society of Clinical Immunology and Allergy. Acute Management of  
33 Anaphylaxis. 2021;:1–  
34 10.[https://allergy.org.au/images/ASCI\\_HP\\_Guidelines\\_Acute\\_Management\\_Anaphylaxis\\_2021.pdf](https://allergy.org.au/images/ASCI_HP_Guidelines_Acute_Management_Anaphylaxis_2021.pdf)
- 35 75 Bialy L, Plint A, Zemek R, *et al.* Pediatric emergency research Canada: origins and  
36 evolution. *Pediatr Emerg Care* 2018;**34**:138–44.
- 37 76 Dribin TE, Sampson HA, Camargo Jr CA, *et al.* Persistent, refractory, and biphasic  
38 anaphylaxis: a multidisciplinary Delphi study. *J Allergy Clin Immunol* 2020;**146**:1089–96.
- 39 77 Alqurashi W, Ellis AK. Do corticosteroids prevent biphasic anaphylaxis? *J Allergy Clin*  
40 *Immunol Pract* 2017;**5**:1194–205.
- 41 78 Xing Y, Zhang H, Sun S, *et al.* Clinical features and treatment of pediatric patients with  
42 drug-induced anaphylaxis: a study based on pharmacovigilance data. *Eur J Pediatr*  
43 2018;**177**:145–54.
- 44 79 Riley RD, Ensor J, Snell KIE, *et al.* Calculating the sample size required for developing a  
45 clinical prediction model. *Bmj* 2020;**368**.
- 46 80 Riley RD, Snell KIE, Ensor J, *et al.* Minimum sample size for developing a multivariable  
47 prediction model: Part I—Continuous outcomes. *Stat Med* 2019;**38**:1262–75.
- 48  
49  
50  
51  
52  
53  
54  
55  
56  
57  
58  
59  
60

- 1  
2  
3 81 Schuh S, Babl FE, Dalziel SR, *et al.* Practice variation in acute bronchiolitis: a pediatric  
4 emergency research networks study. *Pediatrics* 2017;**140**.
- 5 82 Dalziel SR, Thompson JMD, Macias CG, *et al.* Predictors of severe H1N1 infection in  
6 children presenting within Pediatric Emergency Research Networks (PERN): retrospective  
7 case-control study. *Bmj* 2013;**347**.
- 8 83 Lee S, Bellolio MF, Hess EP, *et al.* Time of onset and predictors of biphasic anaphylactic  
9 reactions: a systematic review and meta-analysis. *J Allergy Clin Immunol Pract*  
10 2015;**3**:408–16.
- 11 84 Shaker MS, Wallace D V, Golden DBK, *et al.* Anaphylaxis—a 2020 practice parameter  
12 update, systematic review, and Grading of Recommendations, Assessment, Development  
13 and Evaluation (GRADE) analysis. *J Allergy Clin Immunol* 2020;**145**:1082–123.
- 14 85 Kraft M, Hofmeier KS, Ruëff F, *et al.* Risk factors and characteristics of biphasic  
15 anaphylaxis. *J Allergy Clin Immunol Pract* 2020;**8**:3388–95.
- 16 86 Worm M, Francuzik W, Renaudin J, *et al.* Factors increasing the risk for a severe reaction  
17 in anaphylaxis: An analysis of data from The European Anaphylaxis Registry. *Allergy*  
18 2018;**73**:1322–30.
- 19 87 Turner PJ, Gowland MH, Sharma V, *et al.* Increase in anaphylaxis-related hospitalizations  
20 but no increase in fatalities: an analysis of United Kingdom national anaphylaxis data,  
21 1992-2012. *J Allergy Clin Immunol* 2015;**135**:956–63.
- 22 88 Motosue MS, Bellolio MF, Van Houten HK, *et al.* Risk factors for severe anaphylaxis in  
23 the United States. *Ann Allergy, Asthma Immunol* 2017;**119**:356–61.
- 24 89 Mullins RJ, Wainstein BK, Barnes EH, *et al.* Increases in anaphylaxis fatalities in  
25 Australia from 1997 to 2013. *Clin Exp Allergy* 2016;**46**:1099–110.
- 26 90 Smith PK, Hourihane JO, Lieberman P. Risk multipliers for severe food anaphylaxis.  
27 *World Allergy Organ J* 2015;**8**:1–6.
- 28 91 Hompes S, Köhli A, Nemat K, *et al.* Provoking allergens and treatment of anaphylaxis in  
29 children and adolescents—data from the anaphylaxis registry of German-speaking  
30 countries. *Pediatr allergy Immunol* 2011;**22**:568–74.
- 31 92 Niggemann B, Beyer K. Factors augmenting allergic reactions. *Allergy* 2014;**69**:1582–7.
- 32 93 Muñoz-Cano R, Pascal M, Araujo G, *et al.* Mechanisms, cofactors, and augmenting  
33 factors involved in anaphylaxis. *Front Immunol* 2017;**8**:1193.
- 34 94 Cameron PA, Rainer TH. Anaphylaxis presentations to an emergency department in Hong  
35 Kong: incidence and predictors of biphasic reactions. *J Emerg Med* 2005;**28**:381–8.
- 36 95 Brazil E, MacNamara AF. ‘Not so immediate’ hypersensitivity—the danger of biphasic  
37 anaphylactic reactions. *Emerg Med J* 1998;**15**:252–3.
- 38 96 Oya S, Kinoshita K, Daya M, *et al.* Characteristics of Anaphylactic Reactions: A  
39 Prospective Observational Study in Japan. *J Emerg Med* 2020;**59**:812–9.
- 40 97 Campbell RL, Bashore CJ, Lee S, *et al.* Predictors of repeat epinephrine administration for  
41 emergency department patients with anaphylaxis. *J Allergy Clin Immunol Pract*  
42 2015;**3**:576–84.
- 43 98 Lee JM, Greenes DS. Biphasic anaphylactic reactions in pediatrics. *Pediatrics*  
44 2000;**106**:762–6.
- 45 99 Poachanukoon O, Paopairochanakorn C. Incidence of Anaphylaxis in the Emer-gency  
46 Department: A 1-Year Study in a University Hospital. *Asian Pacific J allergy Immunol*  
47 2006;**24**:111.
- 48 100 Brown SGA. Clinical features and severity grading of anaphylaxis. *J Allergy Clin*

- 1  
2  
3  
4  
5  
6  
7  
8  
9  
10  
11  
12  
13  
14  
15  
16  
17  
18  
19  
20  
21  
22  
23  
24  
25  
26  
27  
28  
29  
30  
31  
32  
33  
34  
35  
36  
37  
38  
39  
40  
41  
42  
43  
44  
45  
46  
47  
48  
49  
50  
51  
52  
53  
54  
55  
56  
57  
58  
59  
60
- Immunol* 2004;**114**:371–6.
- 101 Royston P, Moons KGM, Altman DG, *et al.* Prognosis and prognostic research: developing a prognostic model. *Bmj* 2009;**338**.
- 102 Harrell Jr FE, Lee KL, Mark DB. Multivariable prognostic models: issues in developing models, evaluating assumptions and adequacy, and measuring and reducing errors. *Stat Med* 1996;**15**:361–87.
- 103 Steyerberg EW, Eijkemans MJC, Harrell Jr FE, *et al.* Prognostic modeling with logistic regression analysis: in search of a sensible strategy in small data sets. *Med Decis Mak* 2001;**21**:45–56.
- 104 Vadas P, Perelman B, Liss G. Platelet-activating factor, histamine, and tryptase levels in human anaphylaxis. *J Allergy Clin Immunol* 2013;**131**:144–9.
- 105 Vadas P, Perelman B. Effect of epinephrine on platelet-activating factor–stimulated human vascular smooth muscle cells. *J Allergy Clin Immunol* 2012;**129**:1329–33.
- 106 Alba AC, Agoritsas T, Walsh M, *et al.* Discrimination and calibration of clinical prediction models: users’ guides to the medical literature. *Jama* 2017;**318**:1377–84.
- 107 Vickers AJ, Van Calster B, Steyerberg EW. Net benefit approaches to the evaluation of prediction models, molecular markers, and diagnostic tests. *bmj* 2016;**352**.
- 108 Steyerberg EW, Vickers AJ, Cook NR, *et al.* Assessing the performance of prediction models: a framework for some traditional and novel measures. *Epidemiology* 2010;**21**:128.
- 109 Steyerberg EW, Harrell Jr FE. Prediction models need appropriate internal, internal-external, and external validation. *J Clin Epidemiol* 2016;**69**:245.
- 110 Toll DB, Janssen KJM, Vergouwe Y, *et al.* Validation, updating and impact of clinical prediction rules: a review. *J Clin Epidemiol* 2008;**61**:1085–94.
- 111 Steyerberg EW, Harrell Jr FE, Borsboom GJJM, *et al.* Internal validation of predictive models: efficiency of some procedures for logistic regression analysis. *J Clin Epidemiol* 2001;**54**:774–81.
- 112 Moons KGM, Altman DG, Reitsma JB, *et al.* Transparent Reporting of a multivariable prediction model for Individual Prognosis or Diagnosis (TRIPOD): explanation and elaboration. *Ann Intern Med* 2015;**162**:W1–73.
- 113 Grady D, Berkowitz SA. Why is a good clinical prediction rule so hard to find? *Arch Intern Med* 2011;**171**:1701–2.
- 114 Collins GS, de Groot JA, Dutton S, *et al.* External validation of multivariable prediction models: a systematic review of methodological conduct and reporting. *BMC Med Res Methodol* 2014;**14**:1–11.
- 115 Ban J-W, Empanaza JI, Urreta I, *et al.* Design characteristics influence performance of clinical prediction rules in validation: a meta-epidemiological study. *PLoS One* 2016;**11**:e0145779.
- 116 Alisic E, Hoysted C, Kassam-Adams N, *et al.* Psychosocial care for injured children: Worldwide survey among hospital emergency department staff. *J Pediatr* 2016;**170**:227–33.
- 117 Sullivan LM, Massaro JM, D’Agostino Sr RB. Likelihood Modelling: Presentation of Multivariate Data for Clinical Use: The Framingham Study Risk Score Functions. *Tutorials Biostat Stat Model Complex Med Data* 2004;**2**:445–76.
- 118 Bonnett LJ, Snell KIE, Collins GS, *et al.* Guide to presenting clinical prediction models for use in clinical settings. *bmj* 2019;**365**.

- 1  
2  
3 119 Bowen S, Graham ID. Integrated knowledge translation. *Knowl Transl Heal care Mov*  
4 *from Evid to Pract* 2013;**2**:14–21.  
5 120 Gagliardi AR, Berta W, Kothari A, *et al*. Integrated knowledge translation (IKT) in health  
6 care: a scoping review. *Implement Sci* 2015;**11**:1–12.  
7 121 CIHR. Guide to Knowledge Translation Planning at CIHR: Integrated and End-of-Grant  
8 Approaches. 2012.<http://www.cihr-irsc.gc.ca/e/45321.html#a5> (accessed 11 Apr 2016).  
9 122 Lomas J. Diffusion, dissemination, and implementation: who should do what? *Ann N Y*  
10 *Acad Sci* 1993;**703**:226–37.  
11 123 PERN. PERN-Global.com. <https://www.pern-global.com/> (accessed 11 Apr 2016).  
12 124 TREKK.ca. TREKK.ca. <http://trekk.ca/> (accessed 10 Jan 2017).  
13  
14  
15  
16  
17  
18  
19  
20  
21  
22  
23  
24  
25  
26  
27  
28  
29  
30  
31  
32  
33  
34  
35  
36  
37  
38  
39  
40  
41  
42  
43  
44  
45  
46  
47  
48  
49  
50  
51  
52  
53  
54  
55  
56  
57  
58  
59  
60

For peer review only

## SUPPLEMENTARY MATERIAL:

### Supplementary Material A - Sample Size Calculation

Following (Riley 2019, Riley 2020), the sample size is considered from four perspectives, and the largest sample size calculated is selected as the overall sample size needed.

1. Approximate 95% confidence interval for overall outcome proportion in study population

$$n = \left( \frac{1.96}{\delta} \right)^2 \hat{\theta}(1 - \hat{\theta})$$

$\hat{\theta} = .10$  or  $.15$  - overall outcome proportion in study population

Then for:

$$\hat{\theta} = .10, n=139$$

$$\hat{\theta} = .15, n=196$$

2. Mean absolute prediction error (MAPE) - average error in the model's outcome

$$n = \exp \left( \frac{-0.508 + 0.259 \ln(\theta) + 0.504 \ln(P) - \ln(MAPE)}{0.544} \right)$$

MAPE=0.050 - suggested MAPE is no larger than 0.050 (lower values in settings may be appropriate where precise predictions are needed if consequences of wrong decisions are large)

P=18 - number of predictors

For  $\hat{\theta} = .10$ , then n=274

For  $\hat{\theta} = .15$ , then n=332

3. Achieve expected uniform shrinkage factor S

$$n = \frac{P}{(S - 1) \ln \left( 1 - \frac{R_{CS}^2}{S} \right)}$$

$R_{CS}^2 = 0.10$  or  $0.50$  - proportion of overall variation explained

P=19 - number of predictors

S=0.9 or 0.85 - suggested target for shrinkage of  $\leq 10\%$  (i.e.  $S \geq 0.9$ )

For  $R_{cs}^2 = 0.10$ ,  $S = 0.9$ , then  $n=1529$

For  $R_{cs}^2 = 0.15$ ,  $S = 0.9$ , then  $n=988$

For  $R_{cs}^2 = 0.10$ ,  $S = 0.85$ , then  $n=959$

For  $R_{cs}^2 = 0.15$ ,  $S = 0.85$ , then  $n=1529$

4. Ensure a small expected optimism in apparent  $R^2$

$$n = \frac{P}{(S - 1) \ln \left( 1 - \frac{R_{cs}^2}{S} \right)}$$

Where

$$S = \frac{R_{cs}^2}{R_{cs}^2 + \delta \max(R_{cs}^2)}$$

$$\max(R_{cs}^2) = 1 - \exp \left( \frac{2 \ln L_{null}}{n} \right)$$

$$\ln L_{null} = E \ln \left( \frac{E}{n} \right) + (n - E) \ln \left( 1 - \frac{E}{n} \right)$$

and consider  $\frac{E}{n} = \theta$

For  $\hat{\theta} = .10$ ,  $R_{cs}^2 = 0.10$  then  $\max(R_{cs}^2) = 0.48$ ,  $S = 0.81$  and  $n = 719$

For  $\hat{\theta} = .10$ ,  $R_{cs}^2 = 0.15$  then  $\max(R_{cs}^2) = 0.48$ ,  $S = 0.81$  and  $n = 463$

For  $\hat{\theta} = .15$ ,  $R_{cs}^2 = 0.10$  then  $\max(R_{cs}^2) = 0.57$ ,  $S = 0.84$  and  $n = 888$

For  $\hat{\theta} = .15$ ,  $R_{cs}^2 = 0.15$  then  $\max(R_{cs}^2) = 0.57$ ,  $S = 0.84$  and  $n = 572$

## References

Riley RD et al, Calculating the sample size required for developing a clinical prediction model. *BMJ* 2020;368:m441 doi: 10.1136/bmj.m441.

Riley RD, Snell KI, Ensor J, et al . Minimum sample size for developing a multivariable prediction model: PART II - binary and time-to-event outcomes. *Stat Med* 2019;38:1276-96. 10.1002/sim.7992 30357870

# BMJ Open

## Canadian Anaphylaxis Network- Predicting Recurrence after Emergency Presentation for Allergic REaction (CAN-PREPARE): A Prospective Cohort Study Protocol

|                                 |                                                                                                                                                                                                                                                                                                                                                                                                                                                                                                                                                                                                                                                                                                                                                                                                                                                                                                                                                                                                                                                                                                                                                                                                                                                                                                                                                                                                                                                                                                                                                                                                                                                                                                                                                                                                                                                                                                                           |
|---------------------------------|---------------------------------------------------------------------------------------------------------------------------------------------------------------------------------------------------------------------------------------------------------------------------------------------------------------------------------------------------------------------------------------------------------------------------------------------------------------------------------------------------------------------------------------------------------------------------------------------------------------------------------------------------------------------------------------------------------------------------------------------------------------------------------------------------------------------------------------------------------------------------------------------------------------------------------------------------------------------------------------------------------------------------------------------------------------------------------------------------------------------------------------------------------------------------------------------------------------------------------------------------------------------------------------------------------------------------------------------------------------------------------------------------------------------------------------------------------------------------------------------------------------------------------------------------------------------------------------------------------------------------------------------------------------------------------------------------------------------------------------------------------------------------------------------------------------------------------------------------------------------------------------------------------------------------|
| Journal:                        | <i>BMJ Open</i>                                                                                                                                                                                                                                                                                                                                                                                                                                                                                                                                                                                                                                                                                                                                                                                                                                                                                                                                                                                                                                                                                                                                                                                                                                                                                                                                                                                                                                                                                                                                                                                                                                                                                                                                                                                                                                                                                                           |
| Manuscript ID                   | bmjopen-2022-061976.R1                                                                                                                                                                                                                                                                                                                                                                                                                                                                                                                                                                                                                                                                                                                                                                                                                                                                                                                                                                                                                                                                                                                                                                                                                                                                                                                                                                                                                                                                                                                                                                                                                                                                                                                                                                                                                                                                                                    |
| Article Type:                   | Protocol                                                                                                                                                                                                                                                                                                                                                                                                                                                                                                                                                                                                                                                                                                                                                                                                                                                                                                                                                                                                                                                                                                                                                                                                                                                                                                                                                                                                                                                                                                                                                                                                                                                                                                                                                                                                                                                                                                                  |
| Date Submitted by the Author:   | 04-Aug-2022                                                                                                                                                                                                                                                                                                                                                                                                                                                                                                                                                                                                                                                                                                                                                                                                                                                                                                                                                                                                                                                                                                                                                                                                                                                                                                                                                                                                                                                                                                                                                                                                                                                                                                                                                                                                                                                                                                               |
| Complete List of Authors:       | Alqurashi, Waleed; University of Ottawa Faculty of Medicine, Department of Pediatrics and Emergency Medicine; Children's Hospital of Eastern Ontario Research Institute<br>Shaker, Marcus; Children's Hospital at Dartmouth-Hitchcock, Section of Allergy and Clinical Immunology<br>Wells, George ; University of Ottawa Heart Institute, Cardiovascular Research Methods Centre; University of Ottawa, School of Epidemiology and Public Health<br>Collins, Gary; University of Oxford Nuffield Department of Orthopaedics Rheumatology and Musculoskeletal Sciences, Centre for Statistics in Medicine<br>Greenhawt, Matthew ; Children's Hospital Colorado<br>Curran, Janet; IWK Health Centre, Pediatrics<br>Zemek, Roger; University of Ottawa Faculty of Medicine, Department of Pediatrics and Emergency Medicine; Children's Hospital of Eastern Ontario Research Institute<br>Schuh, Suzanne; The Hospital for Sick Children, Pediatrics<br>Ellis, Anne; Queen's University, Division of Allergy and Immunology<br>Gerdts, Jennifer; Food Allergy Canada<br>Kreviazuk, Cheryl; Children's Hospital of Eastern Ontario Research Institute<br>Dixon, Andrew; Stollery Children's Hospital, Emergency Medicine<br>Eltorki, Mohamed; McMaster Children's Hospital<br>Freedman, Stephen; University of Calgary Cumming School of Medicine, Departments of Pediatrics and Emergency Medicine, Alberta Children's Hospital<br>Gravel, Jocelyn; Centre Hospitalier Universitaire Sainte-Justine<br>Poonai, Naveen; Western University, Departments of Paediatrics, Internal Medicine, Epidemiology & Biostatistics<br>Worm, Margitta; Charite Universitätsmedizin Berlin, Division of Allergy and Immunology, Department of Dermatology and Allergy<br>Plint, Amy; University of Ottawa Faculty of Medicine, Department of Pediatrics and Emergency Medicine; Children's Hospital of Eastern Ontario Research Institute |
| <b>Primary Subject Heading</b>: | Emergency medicine                                                                                                                                                                                                                                                                                                                                                                                                                                                                                                                                                                                                                                                                                                                                                                                                                                                                                                                                                                                                                                                                                                                                                                                                                                                                                                                                                                                                                                                                                                                                                                                                                                                                                                                                                                                                                                                                                                        |
| Secondary Subject Heading:      | Paediatrics                                                                                                                                                                                                                                                                                                                                                                                                                                                                                                                                                                                                                                                                                                                                                                                                                                                                                                                                                                                                                                                                                                                                                                                                                                                                                                                                                                                                                                                                                                                                                                                                                                                                                                                                                                                                                                                                                                               |

1  
2  
3  
4  
5  
6  
7  
8  
9  
10  
11  
12  
13  
14  
15  
16  
17  
18  
19  
20  
21  
22  
23  
24  
25  
26  
27  
28  
29  
30  
31  
32  
33  
34  
35  
36  
37  
38  
39  
40  
41  
42  
43  
44  
45  
46  
47  
48  
49  
50  
51  
52  
53  
54  
55  
56  
57  
58  
59  
60

|           |                                                                             |
|-----------|-----------------------------------------------------------------------------|
| Keywords: | PAEDIATRICS, Paediatric A&E and ambulatory care < PAEDIATRICS, EPIDEMIOLOGY |
|           |                                                                             |

SCHOLARONE™  
Manuscripts



**TITLE PAGE****Title:**

Canadian Anaphylaxis Network- Predicting Recurrence after Emergency Presentation for Allergic REaction (CAN-PREPARE): A Prospective, Cohort Study Protocol

**Authors:**

Waleed Alqurashi, MD, MSc<sup>1,2\*</sup>; Marcus Shaker, MD, MSc<sup>3</sup>; George A. Wells, PhD<sup>4,5</sup>; Gary S. Collins, PhD<sup>6</sup>; Matthew Greenhawt, MD, MBA<sup>7</sup>; Janet Curran, PhD, RN<sup>8</sup>; Roger Zemek, MD<sup>1,2</sup>; Suzanne Schuh, MD<sup>9</sup>; Anne Ellis, MD, MSc<sup>10</sup>; Jennifer Gerdts, BComm<sup>11</sup>; Cheryl Kreviazuk, BA<sup>2</sup>; Andrew Dixon, MD<sup>12</sup>; Mohamed Eltorki, MBChB<sup>13</sup>; Stephen B. Freedman, MDCM, MSc<sup>14</sup>; Jocelyn Gravel, MD, MSc<sup>15</sup>; Naveen Poonai, MD, MSc<sup>16</sup>; Margitta Worm, MD<sup>17</sup>; Amy C. Plint, MD, MSc<sup>1,2</sup>; Pediatric Emergency Research Canada (PERC).

**Affiliations:**

1 Department of Pediatrics and Emergency Medicine, Faculty of Medicine, University of Ottawa, 451 Smyth Road, Ottawa, Ontario, Canada, K1H 8M5

2 Children's Hospital of Eastern Ontario Research Institute, 401 Smyth Road, Ottawa, Ontario, Canada, K1H 8L1

3 Children's Hospital at Dartmouth, Section of Allergy and Clinical Immunology, 1 Medical Center Drive, Lebanon, New Hampshire, United States, 03756

4 Cardiovascular Research Methods Centre, University of Ottawa Heart Institute, 40 Ruskin Street, Ottawa, Ontario, Canada, K1Y 4W7.

1  
2  
3 5 School of Epidemiology and Public Health, University of Ottawa, 600 Peter Morand Crescent,  
4  
5  
6 Ottawa, Ontario, Canada, K1G 5Z3

7  
8 6 Centre for Statistics in Medicine, Nuffield Department of Orthopaedics, Rheumatology, and  
9  
10 Musculoskeletal Sciences, Windmill Road, University of Oxford, Oxford, UK, OX3 7LD

11  
12 7 Children's Hospital Colorado, 13123 East 16<sup>th</sup> Avenue, Aurora, Colorado, United States,  
13  
14  
15 80045

16  
17 8 IWK Health Centre, 5850 University Avenue, Halifax, Nova Scotia, Canada, B3K 6R8

18  
19 9 Hospital for Sick Children, 555 University Avenue, Toronto, Ontario, Canada, M5G 1X8

20  
21 10 Division of Allergy and Immunology, Department of Medicine, Queen's University, 15 Arch  
22  
23 Street, Kingston, Ontario, Canada, K7L 3N6

24  
25  
26 11 Food Allergy Canada, 505 Consumers Road, Toronto, Ontario, Canada, M2J 4V8

27  
28 12 Stollery Children's Hospital, 8440-112 Street, Edmonton, Alberta, Canada, T6G 2C8

29  
30 13 McMaster Children's Hospital, 1200 Main Street West, Hamilton, Ontario, Canada, L8S 4L8

31  
32 14 Departments of Pediatrics and Emergency Medicine, Alberta Children's Hospital, Cumming  
33  
34 School of Medicine, University of Calgary, 28 Oki Drive NW, Calgary, Alberta, Canada, T3B  
35  
36  
37 6A8

38  
39  
40 15 Centre Hospitalier Universitaire Sainte-Justine, Université de Montréal, 3175 Chemin de la  
41  
42 Cote-Ste-Catherine, Montréal, Québec, Canada, H3T 1C5

43  
44 16 Departments of Paediatrics, Internal Medicine, Epidemiology & Biostatistics, Western  
45  
46 University, 800 Commissioners Road East, London, Ontario, Canada, N6A 5W6

47  
48 17 Division of Allergy and Immunology, Dpt Dermatology and Allergy, Charité –  
49  
50  
51 Universitätsmedizin Berlin, Charitéplatz 1, D - 10117 Berlin, Berlin, Germany

**Corresponding Author:**

Waleed Alqurashi

Children's Hospital of Eastern Ontario (CHEO), 401 Smyth Road, Ottawa, ON, K1H 8L1

Phone: 613-737-7600 ext. 3799

Email: [walqurashi@cheo.on.ca](mailto:walqurashi@cheo.on.ca)

ORCID ID: <https://orcid.org/0000-0001-9772-5291>

**Keywords:** Paediatrics; Paediatric A&E and ambulatory care; Epidemiology

**Trial Protocol Version** 2-Feb-2022

**Trial Registration:** Clinicaltrials.gov NCT05135377

**Word Count:** 3223 / 4000 words

**ABSTRACT:****Introduction**

Anaphylaxis is a severe, potentially fatal multi-organ system manifestation of an allergic reaction. The highest incidence of anaphylaxis is in children and adolescents. Biphasic anaphylaxis (BA) is defined as the recurrence of allergic symptoms after resolution of an initial reaction. It has been reported to occur in 10-20% of cases within 1-48 hours from the onset of the initial reaction. The dilemma for physicians is determining which patients with resolved anaphylaxis should be observed for BA, and for how long. Guidelines for duration of post-anaphylaxis monitoring vary, are based on limited evidence, and can have unintended negative impacts on patient safety, quality of life, and healthcare resources. The objectives of this study are to derive a prognostic model for BA and to develop a risk-scoring system that informs disposition decisions of children who present to emergency departments (ED) with anaphylaxis.

**Methods and Analysis**

This prospective multi-centre cohort study will enroll 1,682 patients from seven pediatric EDs that are members of the Pediatric Emergency Research Canada network. We will enroll patients younger than 18 years of age with an allergic reaction meeting anaphylaxis diagnostic criteria. Trained ED research assistants will screen, obtain consent, and prospectively collect study data. Research assistants will follow patients during their ED visit and ascertain, in conjunction with the medical team, if the patient develops BA. A standardized follow-up survey conducted following study enrollment will determine if a biphasic reaction occurred after ED disposition. Model development will conform to the broad principles of the PROGRESS (Prognosis Research Strategy) framework and reporting will follow the TRIPOD Statement.

### **Ethics and Dissemination**

All sites will obtain institutional Research Ethics Board approval. Our dissemination plan focuses on informing clinicians, policy-makers, and parents of the results through publication in peer-reviewed journals and broadcasting on multiple media platforms.

### **Registration Details**

ClinicalTrials.gov (NCT05135377).

For peer review only

**Article Summary:**

Strengths and limitations of this study:

- 1) Largest prospective cohort study on pediatric biphasic anaphylaxis conducted to-date.
- 2) Sample size calculation and statistical analysis plan are based on the highest methodological standard for prediction modelling research.
- 3) We established an international, multidisciplinary expert team encompassing pediatrics, emergency medicine, allergy/immunology, research methodology and statistics, and knowledge translation.
- 4) We instituted an advisory council of external parents, youth, and clinicians end-users and community partners to monitor milestones, identify potential barriers and enablers for future implementation, and guide future decision aid tools.
- 5) This study is not designed to generalize our findings to settings outside of an academic pediatric emergency department; this limitation may be mitigated when we yield a clinically useful and statistically sensitive model that may be externally validated.

## INTRODUCTION:

Anaphylaxis is the most severe form of allergic reaction that rapidly affects multiple body systems and can be fatal.[1,2] The highest incidence is in children and adolescents.[3–8] In Canada, approximately every 10 minutes, there is an Emergency Department (ED) visit for food allergy.[9,10] Up to 80% of anaphylactic reactions in children are triggered by food,[11] and 8% of allergy-related ED visits are due to anaphylactic shock.[3]

According to the Canadian Institute for Health Information, the rate of children visiting Ontario and Alberta EDs for anaphylaxis more than doubled between 2007 and 2014.[3] Among 13- to 17-year-olds, ED visits increased significantly (from 23/100,000 in 2007 to 59/100,000 in 2014). The highest annual rate of ED visits was among children aged 4 and younger.[3] Similarly, the Cross-Canada Anaphylaxis Registry reported a steady increase in pediatric ED visits: from 1.8/1000 in 2011 to 4.5/1000 in 2015.[10,12] These estimates are higher than data from the US and Europe.[13,14]

As the volume of anaphylaxis-related ED visits continues to rise,[10,12] ambiguity in how physicians manage anaphylaxis increases the healthcare burden and may contribute to ED crowding. Current Canadian and international guidelines recommend that all patients with anaphylaxis present to the ED, and after initial reactions have been treated, remain there for a prolonged period to be monitored for biphasic anaphylaxis (BA, also called delayed or late-phase anaphylaxis).[15–17] BA is a second wave of symptoms after initial resolution.[18,19] The reported incidence of this potentially serious phenomenon varies from 10-20%; the majority occur within 1-24 hours from onset of the initial reaction.[16–47] The dilemma for ED

1  
2  
3 physicians is to determine which patients should be observed and the optimum duration of  
4 observation.[48] Guidelines for post-anaphylaxis care vary,[1,16,17] are based on poor or little  
5 evidence, and have negative impacts on patient safety and quality of life.[18,36,49,50] This  
6 clinical uncertainty originates from the lack of validated clinical predictors for BA.  
7  
8 Consequently, many children are hospitalized or undergo prolonged monitoring in the ED after  
9 resolution of initial anaphylaxis.[50,51]  
10  
11

12  
13  
14  
15  
16  
17  
18  
19 In the United States, ED care and hospitalizations are the largest drivers of annual direct medical  
20 costs (\$1.9 billion) for food allergic children.[52] The incremental cost of extended ED  
21 observation of resolved anaphylaxis (6 hours versus 1 hour) is \$62,374 USD per case of BA  
22 identified (\$68,411 USD from the societal perspective). ED monitoring beyond 6 hours of  
23 patients who quickly stabilize after treatment is associated with an incremental cost-effectiveness  
24 ratio of \$230,202 per case observed (societal perspective).[53] As ED crowding and visits for  
25 anaphylaxis increase, current post-anaphylaxis clinical practice is neither sustainable nor cost-  
26 effective.[29]  
27  
28  
29  
30  
31  
32  
33  
34  
35  
36  
37  
38  
39

40 Providing the best evidence-based value care at the lowest cost is critical to optimize resource  
41 stewardship and eliminate wasteful spending in healthcare. In alignment with national and  
42 international research priorities,[54–58] our goal is to derive a prognostic clinical prediction  
43 model that identifies children with anaphylaxis who are at heightened risk of BA. This model  
44 will address a gap in current knowledge and practice, with anticipated benefits for patient care  
45 and health system efficiency worldwide.  
46  
47  
48  
49  
50  
51  
52  
53  
54  
55  
56  
57  
58  
59  
60



## METHODS AND ANALYSIS:

### Study Design

We will conduct a prospective multi-centre cohort study. Prospective data collection is necessary to minimize research waste in prediction modelling, accurately assess the risk and impact of BA on patients and the healthcare system, and derive a clinically useful prediction rule. Our design ensures consistency and precision of data collection of all clinically relevant potential predictors and enables accurate assessment of critical outcomes. Our methods follow established guidelines for developing clinical prediction rules.[59–68] We conform to the PROGRESS (Prognosis Research Strategy) methods of prediction modelling.[66,69–71]

### Study Population

All children aged 0–17 years who present to a participating ED will be screened for study enrollment based on the following criteria:

### Inclusion Criteria

1. Age < 18 years
2. Presenting to ED with an allergic reaction that matches diagnostic criteria for anaphylaxis as defined by the World Allergy Organization (WAO) in 2019.[72] *Anaphylactic reaction* is a multi-system allergic reaction characterized by one or more clinical features involving the respiratory or cardiovascular systems and associated with one or more clinical features involving the skin or gastrointestinal tract. These criteria are universally accepted and endorsed by most international allergy and emergency medicine

1  
2  
3 organizations.[15,54,73] The 2019 WAO guidelines clarify the involvement of two organ  
4 systems is not always requisite for diagnosis: "Although the diagnosis of anaphylaxis  
5 usually depends on the involvement of multiple organ systems, anaphylaxis may present  
6 as an acute cardiac or respiratory event as the only manifestation of anaphylaxis."[72]  
7  
8 Thus, an individual with isolated hypotension, bronchospasm, or upper airway  
9 obstruction after exposure to a known or potential trigger will be deemed to have  
10 anaphylaxis, even if typical skin features are absent.[72,74]  
11  
12  
13  
14  
15  
16  
17  
18

- 19 3. Language proficiency in English or French  
20  
21  
22  
23

### 24 **Exclusion Criteria**

- 25  
26 1. Anaphylactic reaction that occurred in the context of a suicidal attempt or intoxication.  
27  
28 2. Anaphylactic reaction that began in hospital and managed outside the ED (inpatient or  
29 outpatient unit)  
30  
31 3. Inability or unwillingness of individual and/or caregiver to complete the follow-up  
32 surveys post ED discharge.  
33  
34  
35  
36  
37  
38  
39

### 40 **Study Setting**

41  
42 Between April 2022 and June 2024, the study will enrol participants in EDs from seven  
43 hospitals: CHU Sainte-Justine, Children's Hospital of Eastern Ontario, Hospital for Sick  
44 Children, McMaster Children's Hospital, Children's Hospital – London Health Sciences Centre,  
45 Alberta Children's Hospital, and Stollery Children's Hospital. These EDs are members of  
46 Pediatric Emergency Research Canada (PERC; <https://www.perc-canada.ca>)[75]. Research staff  
47  
48  
49  
50  
51  
52  
53  
54  
55  
56  
57  
58  
59  
60

1  
2  
3 will follow site-specific Research Ethics Boards' (REB) guidelines for approaching potential  
4 participants and families for research studies, screening for eligibility, and obtaining consent.  
5  
6  
7

## 8 9 10 **Outcome**

11  
12 The primary outcome is development of BA. As per the recently published consensus  
13 definition,[76] to be classified as BA, an anaphylactic reaction must meet three criteria: 1) initial  
14 anaphylactic reaction followed by resolution of all initial manifestations for  $\geq 1$  hour, with no  
15 new symptoms or treatment administered in that time; 2) second phase of new or recurrent  
16 symptoms or signs that meet the consensus definition of anaphylaxis occurring within 1-48 hours  
17 from complete resolution of initial symptoms or signs; and 3) new or recurrent symptoms or  
18 signs not caused by antigen re-exposure.[35] We will capture any new or recurrent symptoms or  
19 signs, but only clinical manifestations that meet diagnostic criteria for anaphylaxis will be  
20 defined as **anaphylactic biphasic responses**. This definition focuses on *clinically important* or  
21 major biphasic reactions.[29,30] Mild symptoms that involve only the skin (e.g., urticarial rash)  
22 will be captured and classified as minor biphasic responses, but they do not meet our case  
23 definition for BA.  
24  
25  
26  
27  
28  
29  
30  
31  
32  
33  
34  
35  
36  
37  
38  
39  
40  
41

## 42 **Data collection in ED**

43  
44 A research assistant (RA) or research nurse (RN) in the ED will approach potential participants  
45 to screen for eligibility and provide a study overview. When the pre-screen has been completed,  
46 the RA/RN will consult with the attending physician to confirm that the symptoms are consistent  
47 with anaphylaxis. If the attending physician considers the signs and symptoms to be more in line  
48 with another diagnosis (e.g., gastroenteritis), the patient will be excluded. After confirming  
49  
50  
51  
52  
53  
54  
55  
56  
57  
58  
59  
60

participant eligibility, the RA/RN will obtain written informed consent (and assent as appropriate) and proceed with data collection. Table 1 lists the independent variables that will be collected.

**Table 1:** Data collection variables

|                                                                       |                                                                                                                                                                                                                                                                                                                                                                                                                                                                                                                                                                                             |
|-----------------------------------------------------------------------|---------------------------------------------------------------------------------------------------------------------------------------------------------------------------------------------------------------------------------------------------------------------------------------------------------------------------------------------------------------------------------------------------------------------------------------------------------------------------------------------------------------------------------------------------------------------------------------------|
| <b>From clinical history</b>                                          | <ul style="list-style-type: none"> <li>• Demographics: age, sex, date of birth, and self-identified race</li> <li>• Past medical history (e.g., cardiac disease, bronchial asthma, eczema)</li> <li>• Previous ED visits for anaphylaxis</li> <li>• Current anaphylaxis augmenting factors (e.g., physical exercise, viral illness or fever, menses in female, drugs such as non-steroidal anti-inflammatory drugs (NSAID), antacid, <math>\beta</math>-blockers, and ACE inhibitors)</li> <li>• Allergen trigger (e.g., type, time of exposure and onset of symptoms, location)</li> </ul> |
| <b>From physical examination</b>                                      | <ul style="list-style-type: none"> <li>• Participant weight</li> <li>• Vital signs at triage (heart rate, respiratory rate, blood pressure, and oxygen saturation)</li> <li>• Triage score (based on Canadian Pediatric Triage and Acuity Scale)</li> <li>• Physical exam findings upon arrival at ED</li> </ul>                                                                                                                                                                                                                                                                            |
| <b>From pre-hospital and initial ED intervention, and disposition</b> | <ul style="list-style-type: none"> <li>• Treatment interventions (e.g., epinephrine, bronchodilators, etc.) received before arrival at ED and during transport by paramedics (if applicable)</li> <li>• Non-pharmacologic/supportive interventions (such as intubation and intravenous fluids) and timeline</li> <li>• Pharmacologic interventions (including dose, route, frequency, and time administered)</li> <li>• Disposition time, location (home or hospitalization), list of discharge medications, and outpatient allergy referral</li> </ul>                                     |
| <b>From ED monitoring period</b>                                      | <ul style="list-style-type: none"> <li>• Presence and description of new/recurrent symptoms/signs</li> <li>• Time of new recurring symptoms/signs</li> <li>• Management interventions given for biphasic reaction</li> </ul>                                                                                                                                                                                                                                                                                                                                                                |
| <b>From follow-up email/phone call after ED disposition</b>           | <ul style="list-style-type: none"> <li>• Presence and description of new/recurrent symptoms/signs</li> <li>• Time of new/recurrent symptoms/signs</li> <li>• Management interventions given for biphasic reaction, including visits to ED/primary care providers</li> </ul>                                                                                                                                                                                                                                                                                                                 |
| <b>From 6-month follow-up (if applicable)</b>                         | <ul style="list-style-type: none"> <li>• If patient was seen by Allergist</li> <li>• If seen by Allergist, was allergic agent identified?</li> </ul>                                                                                                                                                                                                                                                                                                                                                                                                                                        |

1  
2  
3 The RA/RN will review the physical exam findings with the clinical team (treating ED  
4 physician/bedside nurse). Because anaphylaxis is a clinical diagnosis, participants or caregivers  
5 will be asked about the spectrum of symptoms and signs experienced before and upon arrival in  
6 the ED. The RN/RA will verbally administer a structured questionnaire to participants or  
7 caregivers to collect demographics, medical history, risk factors, reaction characteristics, and  
8 symptoms. Information from the participant and from the medical record about treatment before  
9 and after ED arrival, and biphasic anaphylaxis events during the ED monitoring period, will by  
10 captured by the RN/RA. Missing data will be obtained by questioning the participant, caregiver,  
11 or treating ED team. To capture all BA events and ascertain symptom recurrence while  
12 participants are being monitored, the research RN/RA will follow the participant/caregiver  
13 throughout the ED visit. Events occurring outside study team hours will be captured in the  
14 follow-up questionnaire.  
15  
16  
17  
18  
19  
20  
21  
22  
23  
24  
25  
26  
27  
28  
29  
30  
31  
32

### 33 **First follow-up after ED discharge or hospital admission**

34  
35 Published data have reported symptom recurrence up to 48 hours from anaphylaxis onset.[28,44]  
36  
37 We will contact participants by telephone or email 2-5 days after enrollment to complete a  
38 standardized questionnaire that will capture the nature and timing of new and recurrent  
39 symptoms or signs, follow-up with health providers, return ED visits, and treatments received.  
40  
41 Events that took place in-hospital, but were not previously captured by the study team (e.g.,  
42 outside study team hours), will be verified from the participant's medical chart.  
43  
44  
45  
46  
47  
48  
49  
50  
51  
52  
53  
54  
55  
56  
57  
58  
59  
60

### **Second follow-up after ED discharge or hospital admission**

Participants whose anaphylaxis trigger or culprit allergen was unknown at the time of study enrollment will be contacted 6-9 months after enrollment. We will determine if the participant had been assessed by an allergy specialist in the interim, and if so, whether an allergic agent had been identified.

### **Strategies for retention**

For the follow-up survey, the families of participants will be asked: (1) their preferred mode of contact (email or telephone), and (2) the best time to reach them and contact number. Based on their preferences, we will send the follow-up questionnaire as an automated REDCap survey to the parent/caregiver email address or administer the survey by telephone. If the e-survey is not completed within 24 hours, a second email will be sent. If there is no response to a second email, experienced staff will contact the participant for a telephone interview. A similar schedule of repeat calls will be used to reach those who selected telephone follow-up.

### **Sample Size**

Based on our earlier research and estimates from well-designed adult and pediatric studies,[28,35] 10% is a conservative of the population-wide event rate for BA. Our systematic reviews of potential predictors [77] and other relevant studies identified 19 potential predictive variables.[78] Recent *BMJ* and *Stat in Med* articles offer practical guidance for calculating the sample size required for the development of clinical prediction models.[79,80] Following these guidelines, we considered sample size from four perspectives, with the largest being selected as the sample size needed. The four calculations are based on: the approximate 95% confidence

1  
2  
3 interval for the overall outcome proportion 0.10 in the study population (calculated sample size  
4 needed n=139); the mean absolute prediction error of the average error in the model's outcome  
5 (n=274); achievement of an expected uniform shrinkage factor of  $\leq 10\%$  (n=1,529); and ensuring  
6 a small, expected optimism in the apparent proportion of overall variation explained R<sup>2</sup> (n=719).  
7  
8 Details of these calculations with the selection of the parameter estimates and sensitivity  
9  
10 considerations are provided in **Supplementary Material A**. Taking the largest sample size that  
11  
12 meets all four criteria, we need to enroll 1,529 participants with anaphylaxis. Based on previous  
13  
14 studies by our network, we anticipate 10% loss to follow-up.[81,82] Thus, our estimated sample  
15  
16 size is 1,682 participants.  
17  
18  
19  
20  
21  
22  
23  
24  
25

### 26 **Dependent Predictors Selection for Analysis**

27  
28 Table 2 lists the 19 candidate-dependent predictors that we will include in the analysis. We chose  
29  
30 these 19 variables based on clinical studies of predictors of BA by our team and by others,[16–  
31  
32 47] two systematic reviews,[77,83] the meta-analysis from the 2020 anaphylaxis practice  
33  
34 parameter,[84] and clinical experience. These predictors encompass recently published BA  
35  
36 predictors from the European Anaphylaxis Registry retrospective data.[85] Given the direct  
37  
38 association between initially severe anaphylaxis and subsequent BA, we also include risk factors  
39  
40 of severe anaphylaxis.[86]  
41  
42  
43  
44  
45  
46  
47  
48  
49  
50  
51  
52  
53  
54  
55  
56  
57  
58  
59  
60

**Table 2:** Candidate-dependent predictors that will be included in the analysis for primary objective of study, based on previous clinical studies on BA predictors

| Allergen predictors                                                                                                                                                         | Patient predictors                                                                  |
|-----------------------------------------------------------------------------------------------------------------------------------------------------------------------------|-------------------------------------------------------------------------------------|
| Peanut trigger [85]                                                                                                                                                         | Age [34,35,38,86]                                                                   |
| Venom trigger [86]                                                                                                                                                          | Male sex [86,87]                                                                    |
| Drug trigger [11,78,84,86–89]                                                                                                                                               | Previous anaphylaxis [31,36,39]                                                     |
| Unknown trigger [31,39,83–85]                                                                                                                                               | Pre-existing asthma or chronic lung disease [26,28,42,47,86,87,89]                  |
| ≥30 min from exposure to trigger to onset of symptoms [43,85]                                                                                                               | Exercise as co-factor for anaphylaxis [1,86,90–93]                                  |
| Disease predictors                                                                                                                                                          | Treatment predictors                                                                |
| Signs of severe anaphylaxis* [22,23,25,27,34,38,83,84,94]                                                                                                                   | Treatment of initial reaction with >1 dose of epinephrine [22,23,35,42,45,46,84,95] |
| Wide pulse pressure [84,95]                                                                                                                                                 | Treatment of initial reaction with epinephrine [34,35,44,96]                        |
| Respiratory distress or wheezing [31,35,97]                                                                                                                                 | Systemic steroids [44,84]                                                           |
| Gastrointestinal manifestations [83,85]                                                                                                                                     | Epinephrine administration >60 min from onset of reaction [20,26,35,39,98,99]       |
| Cutaneous manifestations [69, 73]                                                                                                                                           |                                                                                     |
| *Include (as defined by Brown's severity grading score)[100]: cyanosis or SpO <sub>2</sub> ≤ 92%, hypotension, confusion, collapse, loss of consciousness, or incontinence. |                                                                                     |

### Data analysis

The statistical analysis will be performed using R statistical software version 4.0.5 (R Core Team, Vienna, Austria)[101]. Descriptive analysis will be used to summarize baseline participant demographics, anaphylaxis clinical manifestations, and management characteristics. Although race and indigenous status will be collected as demographic characteristics, we will not perform race-based analysis; these variables will be used as descriptors to demonstrate the diversity and representativeness of our sample.



Multivariable regression analysis will be used to derive a predictive model for BA. As recommended by Royston *et al.*[102], our modelling strategy will follow six steps.

- 1) *Evaluate data quality.* Predictors found to be complete (<10% missing data) will be used in a full model approach. Missing data will be considered Missing at Random. If any potential predictor has >10% missing value, a multiple imputation procedure will be followed to replace these values.[61,64] If >50% data are missing, the variable will be omitted from the analysis.
- 2) *Handle and model continuous predictors.* To maximize the predictive ability of the regression model, we will maintain continuous variables such as age.[103,104] A multivariable fractional polynomial procedure will be used to identify and model nonlinear continuous variables. Our a priori categorization of some originally continuous predictors, such as “time to epinephrine treatment,” is based on plausible clinical and basic science research [77,105,106] and recent regression analysis.[39]
- 3) *Develop final model (predictor selection).* Predictors that match the above two criteria will be entered in a “full model” that contains the main effects of all candidate predictors. The objective of predictors reduction is to find the best combinations of variables for accurate prediction (low mean squared error) in a model that is easy for clinicians to use and that contains as few variables as possible. Therefore, we will assess for collinearity and use shrinkage technique as a method of variable reduction.[68] Collinearity between predictors will be evaluated with correlation coefficient ( $r$ ) and variance inflation factors (VIF), which measure the degree to which collinearity degrades the precision of estimate coefficients. Strongly correlated predictors ( $r > 0.8$ , or  $VIF > 10$ ) will be combined in a single variable. In accordance with Harrell and Steyerberg, we will use Penalized maximum likelihood (PML)

1  
2  
3 estimation to perform shrinkage reduction (reduction of the regression coefficients to  
4 improve prediction quality). Maximizing a modified Akaike's Information Criterion will be  
5 used to choose the optimal penalty factor for PML and select the best model. This approach  
6 includes a penalty against large models to deal with the trade-off between overfitting and  
7 model simplicity.[102] The added benefit of this approach is that we could use more penalty  
8 factor if we found significant interaction.  
9

10  
11  
12  
13  
14  
15  
16  
17 4) *Assess model performance with three measures* [64,107,108]  
18

- 19  
20 a. *Calibration* refers to the accuracy of absolute risk estimates.[107] Model  
21 calibration will be assessed by calibration slope, and graphically, by locally  
22 weighted scatterplot smoothing (LOESS) plots of observed versus predicted  
23 probabilities of the outcome. The slope of the calibration curve is a measure of  
24 over-optimism of the model predictions.  
25  
26 b. *Discrimination* will be assessed by the receiver operating characteristics curve  
27 and the concordance (C) index, which measures how well the model discriminates  
28 between participants with and without BA.  
29  
30 c. *Clinical usefulness* of the prediction model will be assessed using net benefit as a  
31 decision analytic.[108,109] The derived prediction rule will be cross-validated by  
32 comparing the classification of each participant with their actual primary outcome  
33 status.  
34  
35  
36  
37  
38  
39  
40  
41  
42  
43  
44  
45  
46

47 5) *Validate model*  
48

- 49 i. *Internal validation.* Recruiting from geographically separated sites enhances  
50 generalizability and supports internal validation of the model.[61,110,111] To correct  
51  
52  
53  
54  
55  
56  
57  
58  
59  
60

1  
2  
3 for overfitting and quantify optimism in model performance, our model will be  
4  
5 validated internally using bootstrapping through the following steps: [103,112,113]  
6  
7  
8 1) After developing the prediction model using the entire original sample and  
9  
10 determining apparent performance, we will generate a bootstrap sample by sampling  
11  
12 individuals with replacement from the original sample; 2) Develop a model using the  
13  
14 bootstrap sample (applying the same modelling and predictor selection in step 3 above);  
15  
16 3) Determine the apparent bootstrap performance of this model (performance of  
17  
18 bootstrap model in the original sample and calculate the optimism as the difference  
19  
20 between bootstrap performance and test performance); 4) Repeat steps 1 through 3 at  
21  
22 least 500 times; and 5) Average the estimates of optimism in step 4, and subtract the  
23  
24 value from the apparent performance obtained in step 1 to obtain an optimism-corrected  
25  
26 estimate of performance.  
27  
28  
29

- 30  
31 ii. *External validation*: Before broad clinical implementation, our derived rule requires  
32  
33 external validation. Lack of external validation is a limitation of many clinical  
34  
35 prediction models.[77,114] For two reasons, this proposal focuses only on model  
36  
37 derivation: 1) Requesting funding for external validation may be premature. Before  
38  
39 embarking on external validation, we need proof that our *a priori* risk factors yield a  
40  
41 clinically useful and statistically sensitive model. 2) The validation phase should be  
42  
43 broader, in different settings, with other participants, and with different  
44  
45 clinicians.[115,116] Our ultimate goal is to validate our model and risk score in an  
46  
47 international setting. Such validation is feasible because PERC is a member of the  
48  
49 Pediatric Emergency Research Networks (PERN), and member networks have a history  
50  
51 of collaboration.[81,82,117]  
52  
53  
54  
55  
56  
57  
58  
59  
60

1  
2  
3 6) *Present model*. As described by Sullivan *et al.*[118], we will use the regression coefficient in  
4 our final fitted model to generate a clinical decision rule that enables point-of-care risk  
5 assessment of BA. To develop a points score system, we will follow the steps described in a  
6 recent *BMJ* paper: [119] 1) Multiply and round regression coefficients of binary predictors;  
7 2) Search for score for continuous predictors to determine the difference in regression units;  
8 3) Estimate multiplication factor for the scores; 4) Use decision curve analysis to assign  
9 participants to risk groups and quantify any deterioration in discriminative performance; and  
10 5) Present accompanying table of probabilities to allow points score to be translated into a  
11 predicted risk. The anticipated stoplight scoring system (green=low→discharge;  
12 yellow=moderate→monitor in ED/preference-sensitive care; red=high→admit to hospital)  
13 will inform evidence-based disposition decisions by clinicians and anticipatory guidance to  
14 families.  
15  
16  
17  
18  
19  
20  
21  
22  
23  
24  
25  
26  
27  
28  
29  
30  
31  
32

### 33 **Patient and Public Involvement**

34 Patients and/or the public were involved in the design and dissemination plans for this research.  
35  
36 To promote uptake of our results, potential knowledge users have been and will be engaged  
37 throughout the project.[120] We have a multi-phase approach to maximize collaboration and  
38 opportunities for diverse knowledge users to interact at various research phases.[121] Our multi-  
39 site team includes ED clinicians as typical end-users and champions for future implementation.  
40  
41 We have established an advisory council of external end-users (parents, youth, ED clinicians)  
42 and community partners (Food Allergy Canada, Canadian Society of Allergy & Clinical  
43 Immunology) to monitor milestones, identify potential barriers and enablers for future  
44 implementation, and guide future decision aids study. The leadership team at Food Allergy  
45  
46  
47  
48  
49  
50  
51  
52  
53  
54  
55  
56  
57  
58  
59  
60

1  
2  
3 Canada has reviewed and supports this proposal. To improve study operation and minimize the  
4  
5 burden on patients and families, we sought feedback from the Patients and Families Advisory  
6  
7 Committee at the Children's Hospital of Eastern Ontario Research Institute.  
8  
9

## 10 11 12 **ETHICS AND DISSEMINATION:** 13

### 14 15 16 17 **Ethics** 18

19 Approval will be obtained from ethics boards at all recruiting centers. Ethics approval has been  
20  
21 received from Clinical Trials Ontario (CTO 3721) for the hospitals in Ontario. Written informed  
22  
23 consent, and/or assent when appropriate, will be obtained from all participants or legal guardians.  
24  
25  
26  
27

28 The study is registered at ClinicalTrials.gov (NCT05135377). Results information from this  
29  
30 study will be submitted to ClinicalTrials.gov.  
31  
32  
33  
34

### 35 36 **End-of-grant KT (Knowledge Translation)** 37

38 ED personnel, providers, allergists, clinical researchers, administrators, and government policy-  
39  
40 makers can use our study outputs to improve healthcare delivery. KT will focus on informing  
41  
42 clinicians, other key user groups, and parents and participants. Our plan has three goals: increase  
43  
44 knowledge awareness, inform/change practice, and inform future research.[122,123]  
45  
46  
47  
48

49 We have a powerful infrastructure to disseminate our results. Study investigators are senior  
50  
51 members of PERC and PERN, networks that include pediatric ED researchers worldwide (>100  
52  
53 hospitals across 6 PERN networks)[124], practicing clinicians, medical educators, and healthcare  
54  
55  
56  
57

1  
2  
3 administrators. PERC is closely tied to the TREKK (Translating Emergency Research  
4 Knowledge for Kids) Network of Centres of Excellence,[125] a partnership for knowledge  
5 exchange between general EDs and PERC sites. Our reporting/publication of the study results  
6 will conform to the Transparent Reporting of a Multivariable Prediction Model for Individual  
7 Prognosis or Diagnosis (TRIPOD) checklist.[113]  
8  
9  
10  
11  
12  
13  
14  
15  
16  
17  
18  
19  
20  
21  
22  
23  
24  
25  
26  
27  
28  
29  
30  
31  
32  
33  
34  
35  
36  
37  
38  
39  
40  
41  
42  
43  
44  
45  
46  
47  
48  
49  
50  
51  
52  
53  
54  
55  
56  
57  
58  
59  
60

For peer review only

**ACKNOWLEDGEMENTS:**

We are grateful to the Patients and Family Advisory Committee at the Children's Hospital of Eastern Ontario Research Institute, and Food Allergy Canada for the insightful comments and feedback on the recruitment approach and data collection forms. We are also grateful to the following research coordinators and research managers for the operational support of the study at their institutions: Candice McGahern, Jena Shank, Judith Sweeney, Kamary Coriolano DaSilva, Patricia Candelaria, Redjana Carciumaru, and Stéphanie Pellerin.

**COMPETING INTERESTS STATEMENT:**

All authors have read and understood BMJ policy on declaration of interests and have no relevant interest to declare. Dr Amy C. Plint is supported by a Tier I University of Ottawa Research Chair. Dr. Stephen Freedman is supported by the Alberta Children's Hospital Professorship in Child Health and Wellness.

For peer review only



**FUNDING STATEMENT:**

This work is supported by the Canadian Institutes of Health Research (CIHR), grant number PJT-175057. This work is also supported by the Children's Hospital Academic Medical Organization (CHAMO) Innovation Fund, grant number N/A.

For peer review only

**AUTHORS' CONTRIBUTIONS:**

WA and ACP conceived the study idea. WA, ACP, and MS wrote the protocol with input from GAM, GSC, MG, JC, RZ, SS, AE, JG, CK, AD, ME, SBF, JG, NP, and MW. All authors provided input into the methodology and analysis plan. All authors approved the final protocol manuscript. ACP and GW are the supervisors of the study.

For peer review only

## REFERENCES:

- 1 Simons FER, Arduzzo LRF, Bilò MB, *et al.* World allergy organization guidelines for the assessment and management of anaphylaxis. *World Allergy Organ J* 2011;**4**:13–37.
- 2 Castells M. Diagnosis and management of anaphylaxis in precision medicine. *J Allergy Clin Immunol* 2017;**140**:321–33.
- 3 CIHI. Anaphylaxis and Allergy in the Emergency Department. 2015.[https://secure.cihi.ca/free\\_products/Anaphylaxis\\_Infosheet\\_en.pdf](https://secure.cihi.ca/free_products/Anaphylaxis_Infosheet_en.pdf) (accessed 18 Dec 2015).
- 4 Sheikh A, Hippisley-Cox J, Newton J, *et al.* Trends in national incidence, lifetime prevalence and adrenaline prescribing for anaphylaxis in England. *J R Soc Med* 2008;**101**:139–43.
- 5 Wood RA, Camargo Jr CA, Lieberman P, *et al.* Anaphylaxis in America: the prevalence and characteristics of anaphylaxis in the United States. *J Allergy Clin Immunol* 2014;**133**:461–7.
- 6 Tejedor-Alonso MA, Moro-Moro M, Múgica-García M V. Epidemiology of Anaphylaxis: Contributions From the Last 10 Years. *J Investig Allergol Clin Immunol* 2015;**25**:163–75.
- 7 Simons FER, Sampson HA. Anaphylaxis epidemic: fact or fiction? *J Allergy Clin Immunol* 2008;**122**:1166–8.
- 8 Lieberman P, Camargo Jr CA, Bohlke K, *et al.* Epidemiology of anaphylaxis: findings of the American college of allergy, asthma and immunology epidemiology of anaphylaxis working group. *Ann Allergy, Asthma Immunol* 2006;**97**:596–602.
- 9 Statistics Canada. The Impact on Emergency Department Utilization of the CFHI Healthcare Collaborations and Initiatives. 2013.[https://www.cfhi-fcass.ca/sf-docs/default-source/reports/risk-analytica.pdf?sfvrsn=bd41df44\\_2](https://www.cfhi-fcass.ca/sf-docs/default-source/reports/risk-analytica.pdf?sfvrsn=bd41df44_2)
- 10 Hochstadter E, Clarke A, De Schryver S, *et al.* Increasing visits for anaphylaxis and the benefits of early epinephrine administration: a 4-year study at a pediatric emergency department in Montreal, Canada. *J Allergy Clin Immunol* 2016;**137**:1888.
- 11 Gabrielli S, Clarke A, Morris J, *et al.* Evaluation of prehospital management in a Canadian emergency department anaphylaxis cohort. *J Allergy Clin Immunol Pract* 2019;**7**:2232–8.
- 12 Lee AYM, Enarson P, Clarke AE, *et al.* Anaphylaxis across two Canadian pediatric centers: evaluating management disparities. *J Asthma Allergy* 2017;**10**:1.
- 13 Motosue MS, Bellolio MF, Van Houten HK, *et al.* National trends in emergency department visits and hospitalizations for food-induced anaphylaxis in US children. *Pediatr Allergy Immunol* 2018;**29**:538–44.
- 14 Grabenhenrich LB, D'Almeida S, Moneret-Vautrin A, *et al.* Anaphylaxis in children and adolescents: The European Anaphylaxis Registry. *J Allergy Clin Immunol* 2016;**137**:1128–1137.e1. doi:10.1016/j.jaci.2015.11.015
- 15 Canadian Society of Allergy and Clinical Immunology. Anaphylaxis in Schools & Other Settings. 2016.<http://csaci.ca/wp-content/uploads/2017/11/Anaphylaxis-in-Schools-Other-Settings-> (accessed 10 Dec 2016).
- 16 Lieberman P, Nicklas RA, Randolph C, *et al.* Anaphylaxis—a practice parameter update 2015. *Ann Allergy, Asthma Immunol* 2015;**115**:341–84. doi:10.1016/j.anai.2015.07.019
- 17 Muraro A, Roberts G, Worm M, *et al.* Anaphylaxis: guidelines from the European Academy of Allergy and Clinical Immunology. *Allergy* 2014;**69**:1026–45.
- 18 Lieberman P. Biphasic anaphylactic reactions. *Ann Allergy, Asthma Immunol*

- 2005;**95**:217–26. doi:10.1016/s1081-1206(10)61217-3
- 19 Tole JW, Lieberman P. Biphasic Anaphylaxis: Review of Incidence, Clinical Predictors, and Observation Recommendations. *Immunol Allergy Clin North Am* 2007;**27**:309–26. doi:10.1016/j.iac.2007.03.011
- 20 Lertnawapan R, Maek-a-nantawat W. Anaphylaxis and biphasic phase in Thailand: 4-year observation. *Allergol Int* 2011;**60**:283–9. doi:10.2332/allergolint.10-OA-0256
- 21 Orhan F, Canitez Y, Bakirtas A, *et al.* Anaphylaxis in Turkish children: A multi-centre, retrospective, case study. *Clin Exp Allergy* 2011;**41**:1767–76. doi:10.1111/j.1365-2222.2011.03859.x
- 22 Inoue N, Yamamoto A. Clinical evaluation of pediatric anaphylaxis and the necessity for multiple doses of epinephrine. *Asia Pac Allergy* 2013;**3**:106. doi:10.5415/apallergy.2013.3.2.106
- 23 Lee J, Garrett JPD, Brown-Whitehorn T, *et al.* Biphasic reactions in children undergoing oral food challenges. In: *Allergy and Asthma Proceedings*. 2013. 220–6. doi:10.2500/aap.2013.34.3669
- 24 Nagano C, Ishiguro A, Yotani N, *et al.* Anaphylaxis and biphasic reaction in a children hospital. *Japanese J Allergol* 2013;**62**:163–70.
- 25 Vezir E, Erkoçoğlu M, Kaya A, *et al.* Characteristics of anaphylaxis in children referred to a tertiary care center. In: *Allergy and Asthma Proceedings*. 2013. 239–46. doi:10.2500/aap.2013.34.3654
- 26 Sampson HA, Mendelson L, Rosen JP. Fatal and Near-Fatal Anaphylactic Reactions to Food in Children and Adolescents. *N Engl J Med* 1992;**327**:380–4. doi:10.1056/nejm199208063270603
- 27 Liew WK, Chiang WC, Goh AE, *et al.* Paediatric anaphylaxis in a Singaporean children cohort: changing food allergy triggers over time. *Asia Pac Allergy* 2013;**3**:29. doi:10.5415/apallergy.2013.3.1.29
- 28 Brown SGA, Stone SF, Fatovich DM, *et al.* Anaphylaxis: clinical patterns, mediator release, and severity. *J Allergy Clin Immunol* 2013;**132**:1141–9.
- 29 Grunau BE, Li J, Yi TW, *et al.* Incidence of clinically important biphasic reactions in emergency department patients with allergic reactions or anaphylaxis. *Ann Emerg Med* 2014;**63**:736–44. doi:10.1016/j.annemergmed.2013.10.017
- 30 Rohacek M, Edenhofer H, Bircher A, *et al.* Biphasic anaphylactic reactions: Occurrence and mortality. *Allergy Eur J Allergy Clin Immunol* 2014;**69**:791–7. doi:10.1111/all.12404
- 31 Lee S, Bellolio MF, Hess EP, *et al.* Predictors of Biphasic Reactions in the Emergency Department for Patients With Anaphylaxis. *J Allergy Clin Immunol Pract* 2014;**2**:281–7. doi:10.1016/j.jaip.2014.01.012
- 32 Oya S, Nakamori T, Kinoshita H. Incidence and characteristics of biphasic and protracted anaphylaxis: evaluation of 114 inpatients. *Acute Med Surg* 2014;**1**:228–33. doi:10.1002/ams2.48
- 33 Sricharoen P, Sittichanbuncha Y, Wibulpolprasert A, *et al.* What clinical factors are associated with biphasic anaphylaxis in Thai adult patients? *Asian Pacific J Allergy Immunol* 2015;**33**:8–13. doi:10.12932/AP0477.33.1.2015
- 34 Manuyakorn W, Benjaponpitak S, Kamchaisatian W, *et al.* Pediatric anaphylaxis: triggers, clinical features, and treatment in a tertiary-care hospital. *Asian Pac J Allergy Immunol* 2015;**33**:281–8.
- 35 Alqurashi W, Stiell I, Chan K, *et al.* Epidemiology and clinical predictors of biphasic

- 1  
2  
3 reactions in children with anaphylaxis. *Ann Allergy, Asthma Immunol* 2015;**115**:217-  
4 223.e2. doi:10.1016/j.anai.2015.05.013
- 5  
6 36 Ko BS, Kim WY, Ryoo SM, *et al.* Biphasic reactions in patients with anaphylaxis treated  
7 with corticosteroids. *Ann Allergy, Asthma Immunol* 2015;**115**:312–6.  
8 doi:10.1016/j.anai.2015.07.015
- 9  
10 37 Douglas DM, Sukenick E, Andrade WP, *et al.* Biphasic systemic anaphylaxis: An  
11 inpatient and outpatient study. *J Allergy Clin Immunol* 1994;**93**:977–85.  
12 doi:10.1016/S0091-6749(94)70044-3
- 13  
14 38 Saleh-Langenberg J, Flokstra-De Blok BMJ, Alagla N, *et al.* Late reactions in food-  
15 allergic children and adolescents after double-blind, placebo-controlled food challenges.  
16 *Allergy Eur J Allergy Clin Immunol* 2016;**71**:1069–73. doi:10.1111/all.12923
- 17  
18 39 Irani AM. Further evaluations of factors that may predict biphasic reactions in emergency  
19 department anaphylaxis patients. *Pediatrics* 2018;**142**:S222–3. doi:10.1542/peds.2018-  
20 2420Y
- 21  
22 40 Kim TH, Yoon SH, Lee SY, *et al.* Biphasic and protracted anaphylaxis to iodinated  
23 contrast media. *Eur Radiol* 2018;**28**:1242–52. doi:10.1007/s00330-017-5052-0
- 24  
25 41 Brady WJ, Lubner S, Carter CT, *et al.* Multiphasic anaphylaxis: An uncommon event in the  
26 emergency department. *Acad Emerg Med* 1997;**4**:193–7. doi:10.1111/j.1553-  
27 2712.1997.tb03739.x
- 28  
29 42 Popa VT, Lerner SA. Biphasic systemic anaphylactic reaction: Three illustrative cases.  
30 *Ann Allergy* 1984;**53**:151–5.
- 31  
32 43 Stark BJ, Sullivan TJ. Biphasic and protracted anaphylaxis. *J Allergy Clin Immunol*  
33 1986;**78**:76–83. doi:10.1016/0091-6749(86)90117-X
- 34  
35 44 Ellis AK, Day JH. Incidence and characteristics of biphasic anaphylaxis: A prospective  
36 evaluation of 103 patients. *Ann Allergy, Asthma Immunol* 2007;**98**:64–9.  
37 doi:10.1016/S1081-1206(10)60861-7
- 38  
39 45 Scranton SE, Gonzalez EG, Waibel KH. Incidence and characteristics of biphasic  
40 reactions after allergen immunotherapy. *J Allergy Clin Immunol* 2009;**123**:493–8.  
41 doi:10.1016/j.jaci.2008.10.026
- 42  
43 46 Mehr S, Liew WK, Tey D, *et al.* Clinical predictors for biphasic reactions in children  
44 presenting with anaphylaxis. *Rev Port Imunoalergologia* 2010;**18**:83.
- 45  
46 47 Confino-Cohen R, Goldberg A. Allergen immunotherapy-induced biphasic systemic  
47 reactions: Incidence, characteristics, and outcome: A prospective study. *Ann Allergy,*  
48 *Asthma Immunol* 2010;**104**:73–8. doi:10.1016/j.anai.2009.11.001
- 49  
50 48 Kemp SF. The post-anaphylaxis dilemma: how long is long enough to observe a patient  
51 after resolution of symptoms? *Curr Allergy Asthma Rep* 2008;**8**:45–8.
- 52  
53 49 Lee S, Sadosty AT, Campbell RL. Update on biphasic anaphylaxis. *Curr Opin Allergy*  
54 *Clin Immunol* 2016;**16**:346–51.
- 55  
56 50 Parlamán JP, Oron AP, Uspal NG, *et al.* Emergency and hospital care for food-related  
57 anaphylaxis in children. *Hosp Pediatr* 2016;**6**:269–74.
- 58  
59 51 Michelson KA, Monuteaux MC, Neuman MI. Variation and trends in anaphylaxis care in  
60 United States children's hospitals. *Acad Emerg Med* 2016;**23**:623–7.
- 52  
53 52 Gupta R, Holdford D, Bilaver L, *et al.* The economic impact of childhood food allergy in  
54 the United States. *JAMA Pediatr* 2013;**167**:1026–31.
- 55  
56 53 Shaker M, Wallace D, Golden DBK, *et al.* Simulation of health and economic benefits of  
57 extended observation of resolved anaphylaxis. *JAMA Netw open* 2019;**2**:e1913951–  
58  
59  
60

- e1913951.
- 54 Simons FER, Arduoso LRF, Bilò MB, *et al.* International consensus on (ICON) anaphylaxis. *World Allergy Organ J* 2014;**7**:9.
- 55 Sicherer SH, Allen K, Lack G, *et al.* Critical issues in food allergy: a national academies consensus report. *Pediatrics* 2017;**140**.
- 56 National Academies of Sciences and Medicine E. *Finding a path to safety in food allergy: assessment of the global burden, causes, prevention, management, and public policy*. National Academies Press 2017.
- 57 National Institute for Health and Clinical Excellence. Anaphylaxis: assessment and referral after emergency treatment | Guidance and guidelines | NICE. 2016.<https://www.nice.org.uk/guidance/cg134/chapter/4-Research-recommendations#the-frequency-and-effects-of-biphasic-reactions> (accessed 12 Dec 2016).
- 58 Bialy L, Plint AC, Freedman SB, *et al.* Pediatric Emergency Research Canada (PERC): Patient/Family-informed Research Priorities for Pediatric Emergency Medicine. *Acad Emerg Med* 2018;**25**:1365–74.
- 59 Stiell IG, Wells GA, Vandemheen K, *et al.* The Canadian CT Head Rule for patients with minor head injury. *Lancet* 2001;**357**:1391–6.
- 60 McGinn TG, Guyatt GH, Wyer PC, *et al.* Users' guides to the medical literature: XXII: how to use articles about clinical decision rules. *Jama* 2000;**284**:79–84.
- 61 Wynants L, Collins GS, Van Calster B. Key steps and common pitfalls in developing and validating risk models. *BJOG An Int J Obstet Gynaecol* 2017;**124**:423–32.
- 62 Reilly BM, Evans AT. Translating clinical research into clinical practice: impact of using prediction rules to make decisions. *Ann Intern Med* 2006;**144**:201–9.
- 63 Green SM, Schriger DL, Yealy DM. Methodologic standards for interpreting clinical decision rules in emergency medicine: 2014 update. *Ann Emerg Med* 2014;**64**:286–91.
- 64 Steyerberg EW, Vergouwe Y. Towards better clinical prediction models: seven steps for development and an ABCD for validation. *Eur Heart J* 2014;**35**:1925–31.
- 65 Steyerberg EW, Uno H, Ioannidis JPA, *et al.* Poor performance of clinical prediction models: the harm of commonly applied methods. *J Clin Epidemiol* 2018;**98**:133–43.
- 66 Riley R. Prognostic model research. 2020.<https://www.prognosisresearch.com/>
- 67 Harrell FE. *Regression modeling strategies: with applications to linear models, logistic regression, and survival analysis 2nd Edition*. Springer International Publishing 2015.
- 68 Steyerberg EW. *Clinical prediction models*. Springer 2019.
- 69 Riley RD, Hayden JA, Steyerberg EW, *et al.* Prognosis Research Strategy (PROGRESS) 2: prognostic factor research. *PLoS Med* 2013;**10**:e1001380.
- 70 Steyerberg EW, Moons KGM, van der Windt DA, *et al.* Prognosis Research Strategy (PROGRESS) 3: prognostic model research. *PLoS Med* 2013;**10**:e1001381.
- 71 Collins GS, Reitsma JB, Altman DG, *et al.* Transparent reporting of a multivariable prediction model for individual prognosis or diagnosis (TRIPOD): the TRIPOD statement. *J Br Surg* 2015;**102**:148–58.
- 72 Turner PJ, Worm M, Ansotegui IJ, *et al.* Time to revisit the definition and clinical criteria for anaphylaxis? *World Allergy Organ J* 2019;**12**.
- 73 Campbell RL, Li JTC, Nicklas RA, *et al.* Emergency department diagnosis and treatment of anaphylaxis: a practice parameter. *Ann Allergy, Asthma Immunol* 2014;**113**:599–608.
- 74 Australian Society of Clinical Immunology and Allergy. Acute Management of Anaphylaxis. 2021;:1–

10. [https://allergy.org.au/images/ASCIA\\_HP\\_Guidelines\\_Acute\\_Management\\_Anaphylaxis\\_2021.pdf](https://allergy.org.au/images/ASCIA_HP_Guidelines_Acute_Management_Anaphylaxis_2021.pdf)
- 75 Bialy L, Plint A, Zemek R, *et al*. Pediatric emergency research Canada: origins and evolution. *Pediatr Emerg Care* 2018;**34**:138–44.
- 76 Dribin TE, Sampson HA, Camargo Jr CA, *et al*. Persistent, refractory, and biphasic anaphylaxis: a multidisciplinary Delphi study. *J Allergy Clin Immunol* 2020;**146**:1089–96.
- 77 Alqurashi W, Ellis AK. Do corticosteroids prevent biphasic anaphylaxis? *J Allergy Clin Immunol Pract* 2017;**5**:1194–205.
- 78 Xing Y, Zhang H, Sun S, *et al*. Clinical features and treatment of pediatric patients with drug-induced anaphylaxis: a study based on pharmacovigilance data. *Eur J Pediatr* 2018;**177**:145–54.
- 79 Riley RD, Ensor J, Snell KIE, *et al*. Calculating the sample size required for developing a clinical prediction model. *Bmj* 2020;**368**.
- 80 Riley RD, Snell KIE, Ensor J, *et al*. Minimum sample size for developing a multivariable prediction model: Part I—Continuous outcomes. *Stat Med* 2019;**38**:1262–75.
- 81 Schuh S, Babl FE, Dalziel SR, *et al*. Practice variation in acute bronchiolitis: a pediatric emergency research networks study. *Pediatrics* 2017;**140**.
- 82 Dalziel SR, Thompson JMD, Macias CG, *et al*. Predictors of severe H1N1 infection in children presenting within Pediatric Emergency Research Networks (PERN): retrospective case-control study. *Bmj* 2013;**347**.
- 83 Lee S, Bellolio MF, Hess EP, *et al*. Time of onset and predictors of biphasic anaphylactic reactions: a systematic review and meta-analysis. *J Allergy Clin Immunol Pract* 2015;**3**:408–16.
- 84 Shaker MS, Wallace D V, Golden DBK, *et al*. Anaphylaxis—a 2020 practice parameter update, systematic review, and Grading of Recommendations, Assessment, Development and Evaluation (GRADE) analysis. *J Allergy Clin Immunol* 2020;**145**:1082–123.
- 85 Kraft M, Hofmeier KS, Ruëff F, *et al*. Risk factors and characteristics of biphasic anaphylaxis. *J Allergy Clin Immunol Pract* 2020;**8**:3388–95.
- 86 Worm M, Francuzik W, Renaudin J, *et al*. Factors increasing the risk for a severe reaction in anaphylaxis: An analysis of data from The European Anaphylaxis Registry. *Allergy* 2018;**73**:1322–30.
- 87 Turner PJ, Gowland MH, Sharma V, *et al*. Increase in anaphylaxis-related hospitalizations but no increase in fatalities: an analysis of United Kingdom national anaphylaxis data, 1992-2012. *J Allergy Clin Immunol* 2015;**135**:956–63.
- 88 Motosue MS, Bellolio MF, Van Houten HK, *et al*. Risk factors for severe anaphylaxis in the United States. *Ann Allergy, Asthma Immunol* 2017;**119**:356–61.
- 89 Mullins RJ, Wainstein BK, Barnes EH, *et al*. Increases in anaphylaxis fatalities in Australia from 1997 to 2013. *Clin Exp Allergy* 2016;**46**:1099–110.
- 90 Smith PK, Hourihane JO, Lieberman P. Risk multipliers for severe food anaphylaxis. *World Allergy Organ J* 2015;**8**:1–6.
- 91 Hompes S, Köhli A, Nemat K, *et al*. Provoking allergens and treatment of anaphylaxis in children and adolescents—data from the anaphylaxis registry of German-speaking countries. *Pediatr allergy Immunol* 2011;**22**:568–74.
- 92 Niggemann B, Beyer K. Factors augmenting allergic reactions. *Allergy* 2014;**69**:1582–7.
- 93 Muñoz-Cano R, Pascal M, Araujo G, *et al*. Mechanisms, cofactors, and augmenting factors involved in anaphylaxis. *Front Immunol* 2017;**8**:1193.

- 1  
2  
3 94 Cameron PA, Rainer TH. Anaphylaxis presentations to an emergency department in Hong  
4 Kong: incidence and predictors of biphasic reactions. *J Emerg Med* 2005;**28**:381–8.  
5 95 Brazil E, MacNamara AF. “Not so immediate” hypersensitivity--the danger of biphasic  
6 anaphylactic reactions. *Emerg Med J* 1998;**15**:252–3.  
7 96 Oya S, Kinoshita K, Daya M, *et al.* Characteristics of Anaphylactic Reactions: A  
8 Prospective Observational Study in Japan. *J Emerg Med* 2020;**59**:812–9.  
9 97 Campbell RL, Bashore CJ, Lee S, *et al.* Predictors of repeat epinephrine administration for  
10 emergency department patients with anaphylaxis. *J Allergy Clin Immunol Pract*  
11 2015;**3**:576–84.  
12 98 Lee JM, Greenes DS. Biphasic anaphylactic reactions in pediatrics. *Pediatrics*  
13 2000;**106**:762–6.  
14 99 Poachanukoon O, Paopairochanakorn C. Incidence of Anaphylaxis in the Emer-gency  
15 Department: A 1-Year Study in a University Hospital. *Asian Pacific J allergy Immunol*  
16 2006;**24**:111.  
17 100 Brown SGA. Clinical features and severity grading of anaphylaxis. *J Allergy Clin*  
18 *Immunol* 2004;**114**:371–6.  
19 101 R Core Team. R: A language and environment for statistical computing. R Found. Stat.  
20 Comput. 2021. <https://www.r-project.org/>  
21 102 Royston P, Moons KGM, Altman DG, *et al.* Prognosis and prognostic research:  
22 developing a prognostic model. *Bmj* 2009;**338**.  
23 103 Harrell Jr FE, Lee KL, Mark DB. Multivariable prognostic models: issues in developing  
24 models, evaluating assumptions and adequacy, and measuring and reducing errors. *Stat*  
25 *Med* 1996;**15**:361–87.  
26 104 Steyerberg EW, Eijkemans MJC, Harrell Jr FE, *et al.* Prognostic modeling with logistic  
27 regression analysis: in search of a sensible strategy in small data sets. *Med Decis Mak*  
28 2001;**21**:45–56.  
29 105 Vadas P, Perelman B, Liss G. Platelet-activating factor, histamine, and tryptase levels in  
30 human anaphylaxis. *J Allergy Clin Immunol* 2013;**131**:144–9.  
31 106 Vadas P, Perelman B. Effect of epinephrine on platelet-activating factor–stimulated  
32 human vascular smooth muscle cells. *J Allergy Clin Immunol* 2012;**129**:1329–33.  
33 107 Alba AC, Agoritsas T, Walsh M, *et al.* Discrimination and calibration of clinical  
34 prediction models: users’ guides to the medical literature. *Jama* 2017;**318**:1377–84.  
35 108 Vickers AJ, Van Calster B, Steyerberg EW. Net benefit approaches to the evaluation of  
36 prediction models, molecular markers, and diagnostic tests. *bmj* 2016;**352**.  
37 109 Steyerberg EW, Vickers AJ, Cook NR, *et al.* Assessing the performance of prediction  
38 models: a framework for some traditional and novel measures. *Epidemiology*  
39 2010;**21**:128.  
40 110 Steyerberg EW, Harrell Jr FE. Prediction models need appropriate internal, internal-  
41 external, and external validation. *J Clin Epidemiol* 2016;**69**:245.  
42 111 Toll DB, Janssen KJM, Vergouwe Y, *et al.* Validation, updating and impact of clinical  
43 prediction rules: a review. *J Clin Epidemiol* 2008;**61**:1085–94.  
44 112 Steyerberg EW, Harrell Jr FE, Borsboom GJJM, *et al.* Internal validation of predictive  
45 models: efficiency of some procedures for logistic regression analysis. *J Clin Epidemiol*  
46 2001;**54**:774–81.  
47 113 Moons KGM, Altman DG, Reitsma JB, *et al.* Transparent Reporting of a multivariable  
48 prediction model for Individual Prognosis or Diagnosis (TRIPOD): explanation and  
49  
50  
51  
52  
53  
54  
55  
56  
57  
58  
59  
60



- 1  
2  
3 elaboration. *Ann Intern Med* 2015;**162**:W1–73.
- 4 114 Grady D, Berkowitz SA. Why is a good clinical prediction rule so hard to find? *Arch*  
5 *Intern Med* 2011;**171**:1701–2.
- 6 115 Collins GS, de Groot JA, Dutton S, *et al.* External validation of multivariable prediction  
7 models: a systematic review of methodological conduct and reporting. *BMC Med Res*  
8 *Methodol* 2014;**14**:1–11.
- 9 116 Ban J-W, Empananza JI, Urreta I, *et al.* Design characteristics influence performance of  
10 clinical prediction rules in validation: a meta-epidemiological study. *PLoS One*  
11 2016;**11**:e0145779.
- 12 117 Alisic E, Hoysted C, Kassam-Adams N, *et al.* Psychosocial care for injured children:  
13 Worldwide survey among hospital emergency department staff. *J Pediatr* 2016;**170**:227–  
14 33.
- 15 118 Sullivan LM, Massaro JM, D’Agostino Sr RB. Likelihood Modelling: Presentation of  
16 Multivariate Data for Clinical Use: The Framingham Study Risk Score Functions.  
17 *Tutorials Biostat Stat Model Complex Med Data* 2004;**2**:445–76.
- 18 119 Bonnett LJ, Snell KIE, Collins GS, *et al.* Guide to presenting clinical prediction models  
19 for use in clinical settings. *bmj* 2019;**365**.
- 20 120 Bowen S, Graham ID. Integrated knowledge translation. *Knowl Transl Heal care Mov*  
21 *from Evid to Pract* 2013;**2**:14–21.
- 22 121 Gagliardi AR, Berta W, Kothari A, *et al.* Integrated knowledge translation (IKT) in health  
23 care: a scoping review. *Implement Sci* 2015;**11**:1–12.
- 24 122 CIHR. Guide to Knowledge Translation Planning at CIHR: Integrated and End-of-Grant  
25 Approaches. 2012. <http://www.cihr-irsc.gc.ca/e/45321.html#a5> (accessed 11 Apr 2016).
- 26 123 Lomas J. Diffusion, dissemination, and implementation: who should do what? *Ann N Y*  
27 *Acad Sci* 1993;**703**:226–37.
- 28 124 PERN. PERN-Global.com. <https://www.pern-global.com/> (accessed 11 Apr 2016).
- 29 125 TREKK.ca. TREKK.ca. <http://trekk.ca/> (accessed 10 Jan 2017).
- 30  
31  
32  
33  
34  
35  
36  
37  
38  
39  
40  
41  
42  
43  
44  
45  
46  
47  
48  
49  
50  
51  
52  
53  
54  
55  
56  
57  
58  
59  
60

## SUPPLEMENTARY MATERIAL:

### Supplementary Material A - Sample Size Calculation

Following (Riley 2019, Riley 2020), the sample size is considered from four perspectives, and the largest sample size calculated is selected as the overall sample size needed.

1. Approximate 95% confidence interval for overall outcome proportion in study population

$$n = \left( \frac{1.96}{\delta} \right)^2 \hat{\theta}(1 - \hat{\theta})$$

$\hat{\theta} = .10$  or  $.15$  - overall outcome proportion in study population

Then for:

$$\hat{\theta} = .10, n=139$$

$$\hat{\theta} = .15, n=196$$

2. Mean absolute prediction error (MAPE) - average error in the model's outcome

$$n = \exp \left( \frac{-0.508 + 0.259 \ln(\theta) + 0.504 \ln(P) - \ln(MAPE)}{0.544} \right)$$

MAPE=0.050 - suggested MAPE is no larger than 0.050 (lower values in settings may be appropriate where precise predictions are needed if consequences of wrong decisions are large)

P=18 - number of predictors

For  $\hat{\theta} = .10$ , then n=274

For  $\hat{\theta} = .15$ , then n=332

3. Achieve expected uniform shrinkage factor S

$$n = \frac{P}{(S - 1) \ln \left( 1 - \frac{R_{CS}^2}{S} \right)}$$

$R_{CS}^2 = 0.10$  or  $0.15$  - proportion of overall variation

explained P=19 - number of predictors

S=0.9 or 0.85 - suggested target for shrinkage of  $\leq 10\%$  (i.e.  $S \geq 0.9$ )

For  $R_{cs}^2 = 0.10$ ,  $S = 0.9$ , then  $n=1529$

For  $R_{cs}^2 = 0.15$ ,  $S = 0.9$ , then  $n=988$

For  $R_{cs}^2 = 0.10$ ,  $S = 0.85$ , then  $n=959$

For  $R_{cs}^2 = 0.15$ ,  $S = 0.85$ , then  $n=1529$

4. Ensure a small expected optimism in apparent  $R^2$

$$n = \frac{P}{(S - 1) \ln \left( 1 - \frac{R_{cs}^2}{S} \right)}$$

Where

$$S = \frac{R_{cs}^2}{R_{cs}^2 + \delta \max(R_{cs}^2)}$$

$$\max(R_{cs}^2) = 1 - \exp \left( \frac{2 \ln L_{null}}{n} \right)$$

$$\ln L_{null} = E \ln \left( \frac{E}{n} \right) + (n - E) \ln \left( 1 - \frac{E}{n} \right)$$

and consider  $\frac{E}{n} = \theta$

For  $\hat{\theta} = .10$ ,  $R_{cs}^2 = 0.10$  then  $\max(R_{cs}^2) = 0.48$ ,  $S = 0.81$  and  $n = 719$

For  $\hat{\theta} = .10$ ,  $R_{cs}^2 = 0.15$  then  $\max(R_{cs}^2) = 0.48$ ,  $S = 0.81$  and  $n = 463$

For  $\hat{\theta} = .15$ ,  $R_{cs}^2 = 0.10$  then  $\max(R_{cs}^2) = 0.57$ ,  $S = 0.84$  and  $n = 888$

For  $\hat{\theta} = .15$ ,  $R_{cs}^2 = 0.15$  then  $\max(R_{cs}^2) = 0.57$ ,  $S = 0.84$  and  $n = 572$

## References

Riley RD et al, Calculating the sample size required for developing a clinical prediction model. *BMJ* 2020;368:m441 doi: 10.1136/bmj.m441.

Riley RD, Snell KI, Ensor J, et al. Minimum sample size for developing a multivariable prediction model: PART II - binary and time-to-event outcomes. *Stat Med* 2019;38:1276-96. 10.1002/sim.7992 30357870

1  
2  
3  
4  
5  
6  
7  
8  
9  
10  
11  
12  
13  
14  
15  
16  
17  
18  
19  
20  
21  
22  
23  
24  
25  
26  
27  
28  
29  
30  
31  
32  
33  
34  
35  
36  
37  
38  
39  
40  
41  
42  
43  
44  
45  
46  
47  
48  
49  
50  
51  
52  
53  
54  
55  
56  
57  
58  
59  
60

## STROBE Statement—checklist of items that should be included in reports of observational studies

|                              | Item No | Recommendation                                                                                                                                                                                                                                                                                                                                                                                                                                                         | Page No |
|------------------------------|---------|------------------------------------------------------------------------------------------------------------------------------------------------------------------------------------------------------------------------------------------------------------------------------------------------------------------------------------------------------------------------------------------------------------------------------------------------------------------------|---------|
| <b>Title and abstract</b>    | 1       | (a) Indicate the study's design with a commonly used term in the title or the abstract                                                                                                                                                                                                                                                                                                                                                                                 | 4       |
|                              |         | (b) Provide in the abstract an informative and balanced summary of what was done and what was found                                                                                                                                                                                                                                                                                                                                                                    | 4 – 5   |
| <b>Introduction</b>          |         |                                                                                                                                                                                                                                                                                                                                                                                                                                                                        |         |
| Background/rationale         | 2       | Explain the scientific background and rationale for the investigation being reported                                                                                                                                                                                                                                                                                                                                                                                   | 7 – 8   |
| Objectives                   | 3       | State specific objectives, including any prespecified hypotheses                                                                                                                                                                                                                                                                                                                                                                                                       | 8       |
| <b>Methods</b>               |         |                                                                                                                                                                                                                                                                                                                                                                                                                                                                        |         |
| Study design                 | 4       | Present key elements of study design early in the paper                                                                                                                                                                                                                                                                                                                                                                                                                | 9       |
| Setting                      | 5       | Describe the setting, locations, and relevant dates, including periods of recruitment, exposure, follow-up, and data collection                                                                                                                                                                                                                                                                                                                                        | 9 – 10  |
| Participants                 | 6       | (a) <i>Cohort study</i> —Give the eligibility criteria, and the sources and methods of selection of participants. Describe methods of follow-up<br><i>Case-control study</i> —Give the eligibility criteria, and the sources and methods of case ascertainment and control selection. Give the rationale for the choice of cases and controls<br><i>Cross-sectional study</i> —Give the eligibility criteria, and the sources and methods of selection of participants | 9 – 10  |
|                              |         | (b) <i>Cohort study</i> —For matched studies, give matching criteria and number of exposed and unexposed<br><i>Case-control study</i> —For matched studies, give matching criteria and the number of controls per case                                                                                                                                                                                                                                                 | N/A     |
| Variables                    | 7       | Clearly define all outcomes, exposures, predictors, potential confounders, and effect modifiers. Give diagnostic criteria, if applicable                                                                                                                                                                                                                                                                                                                               | 11      |
| Data sources/<br>measurement | 8*      | For each variable of interest, give sources of data and details of methods of assessment (measurement). Describe comparability of assessment methods if there is more than one group                                                                                                                                                                                                                                                                                   | 11 – 13 |
| Bias                         | 9       | Describe any efforts to address potential sources of bias                                                                                                                                                                                                                                                                                                                                                                                                              | N/A     |
| Study size                   | 10      | Explain how the study size was arrived at                                                                                                                                                                                                                                                                                                                                                                                                                              | 14 – 15 |
| Quantitative variables       | 11      | Explain how quantitative variables were handled in the analyses. If applicable, describe which groupings were chosen and why                                                                                                                                                                                                                                                                                                                                           | 15 – 16 |
| Statistical methods          | 12      | (a) Describe all statistical methods, including those used to control for confounding                                                                                                                                                                                                                                                                                                                                                                                  | 16 – 20 |
|                              |         | (b) Describe any methods used to examine subgroups and interactions                                                                                                                                                                                                                                                                                                                                                                                                    | N/A     |
|                              |         | (c) Explain how missing data were addressed                                                                                                                                                                                                                                                                                                                                                                                                                            | 17      |
|                              |         | (d) <i>Cohort study</i> —If applicable, explain how loss to follow-up was addressed<br><i>Case-control study</i> —If applicable, explain how matching of cases and controls was addressed<br><i>Cross-sectional study</i> —If applicable, describe analytical methods taking account of sampling strategy                                                                                                                                                              | N/A     |
|                              |         | (e) Describe any sensitivity analyses                                                                                                                                                                                                                                                                                                                                                                                                                                  | N/A     |

Continued on next page

| <b>Results</b>           |     |                                                                                                                                                                                                              | <b>Page No</b> |
|--------------------------|-----|--------------------------------------------------------------------------------------------------------------------------------------------------------------------------------------------------------------|----------------|
| Participants             | 13* | (a) Report numbers of individuals at each stage of study—eg numbers potentially eligible, examined for eligibility, confirmed eligible, included in the study, completing follow-up, and analysed            | N/A            |
|                          |     | (b) Give reasons for non-participation at each stage                                                                                                                                                         | N/A            |
|                          |     | (c) Consider use of a flow diagram                                                                                                                                                                           | N/A            |
| Descriptive data         | 14* | (a) Give characteristics of study participants (eg demographic, clinical, social) and information on exposures and potential confounders                                                                     | N/A            |
|                          |     | (b) Indicate number of participants with missing data for each variable of interest                                                                                                                          | N/A            |
|                          |     | (c) <i>Cohort study</i> —Summarise follow-up time (eg, average and total amount)                                                                                                                             | N/A            |
| Outcome data             | 15* | <i>Cohort study</i> —Report numbers of outcome events or summary measures over time                                                                                                                          | N/A            |
|                          |     | <i>Case-control study</i> —Report numbers in each exposure category, or summary measures of exposure                                                                                                         | N/A            |
|                          |     | <i>Cross-sectional study</i> —Report numbers of outcome events or summary measures                                                                                                                           | N/A            |
| Main results             | 16  | (a) Give unadjusted estimates and, if applicable, confounder-adjusted estimates and their precision (eg, 95% confidence interval). Make clear which confounders were adjusted for and why they were included | N/A            |
|                          |     | (b) Report category boundaries when continuous variables were categorized                                                                                                                                    | N/A            |
|                          |     | (c) If relevant, consider translating estimates of relative risk into absolute risk for a meaningful time period                                                                                             | N/A            |
| Other analyses           | 17  | Report other analyses done—eg analyses of subgroups and interactions, and sensitivity analyses                                                                                                               | N/A            |
| <b>Discussion</b>        |     |                                                                                                                                                                                                              |                |
| Key results              | 18  | Summarise key results with reference to study objectives                                                                                                                                                     | N/A            |
| Limitations              | 19  | Discuss limitations of the study, taking into account sources of potential bias or imprecision. Discuss both direction and magnitude of any potential bias                                                   | N/A            |
| Interpretation           | 20  | Give a cautious overall interpretation of results considering objectives, limitations, multiplicity of analyses, results from similar studies, and other relevant evidence                                   | N/A            |
| Generalisability         | 21  | Discuss the generalisability (external validity) of the study results                                                                                                                                        | N/A            |
| <b>Other information</b> |     |                                                                                                                                                                                                              |                |
| Funding                  | 22  | Give the source of funding and the role of the funders for the present study and, if applicable, for the original study on which the present article is based                                                | 25             |

\*Give information separately for cases and controls in case-control studies and, if applicable, for exposed and unexposed groups in cohort and cross-sectional studies.

**Note:** An Explanation and Elaboration article discusses each checklist item and gives methodological background and published examples of transparent reporting. The STROBE checklist is best used in conjunction with this article (freely available on the Web sites of PLoS Medicine at <http://www.plosmedicine.org/>, Annals of Internal Medicine at <http://www.annals.org/>, and Epidemiology at <http://www.epidem.com/>). Information on the STROBE Initiative is available at [www.strobe-statement.org](http://www.strobe-statement.org).

# BMJ Open

## Canadian Anaphylaxis Network- Predicting Recurrence after Emergency Presentation for Allergic REaction (CAN-PREPARE): A Prospective, Cohort Study Protocol

|                                 |                                                                                                                                                                                                                                                                                                                                                                                                                                                                                                                                                                                                                                                                                                                                                                                                                                                                                                                                                                                                                                                                                                                                                                                                                                                                                                                                                                                                                                                                                                                                                                                                                                                                                                                                                                                                                                                                                                                                                                                                          |
|---------------------------------|----------------------------------------------------------------------------------------------------------------------------------------------------------------------------------------------------------------------------------------------------------------------------------------------------------------------------------------------------------------------------------------------------------------------------------------------------------------------------------------------------------------------------------------------------------------------------------------------------------------------------------------------------------------------------------------------------------------------------------------------------------------------------------------------------------------------------------------------------------------------------------------------------------------------------------------------------------------------------------------------------------------------------------------------------------------------------------------------------------------------------------------------------------------------------------------------------------------------------------------------------------------------------------------------------------------------------------------------------------------------------------------------------------------------------------------------------------------------------------------------------------------------------------------------------------------------------------------------------------------------------------------------------------------------------------------------------------------------------------------------------------------------------------------------------------------------------------------------------------------------------------------------------------------------------------------------------------------------------------------------------------|
| Journal:                        | <i>BMJ Open</i>                                                                                                                                                                                                                                                                                                                                                                                                                                                                                                                                                                                                                                                                                                                                                                                                                                                                                                                                                                                                                                                                                                                                                                                                                                                                                                                                                                                                                                                                                                                                                                                                                                                                                                                                                                                                                                                                                                                                                                                          |
| Manuscript ID                   | bmjopen-2022-061976.R2                                                                                                                                                                                                                                                                                                                                                                                                                                                                                                                                                                                                                                                                                                                                                                                                                                                                                                                                                                                                                                                                                                                                                                                                                                                                                                                                                                                                                                                                                                                                                                                                                                                                                                                                                                                                                                                                                                                                                                                   |
| Article Type:                   | Protocol                                                                                                                                                                                                                                                                                                                                                                                                                                                                                                                                                                                                                                                                                                                                                                                                                                                                                                                                                                                                                                                                                                                                                                                                                                                                                                                                                                                                                                                                                                                                                                                                                                                                                                                                                                                                                                                                                                                                                                                                 |
| Date Submitted by the Author:   | 28-Sep-2022                                                                                                                                                                                                                                                                                                                                                                                                                                                                                                                                                                                                                                                                                                                                                                                                                                                                                                                                                                                                                                                                                                                                                                                                                                                                                                                                                                                                                                                                                                                                                                                                                                                                                                                                                                                                                                                                                                                                                                                              |
| Complete List of Authors:       | <p>Alqurashi, Waleed; University of Ottawa Faculty of Medicine, Department of Pediatrics and Emergency Medicine; Children's Hospital of Eastern Ontario Research Institute</p> <p>Shaker, Marcus; Children's Hospital at Dartmouth-Hitchcock, Section of Allergy and Clinical Immunology</p> <p>Wells, George ; University of Ottawa Heart Institute, Cardiovascular Research Methods Centre; University of Ottawa, School of Epidemiology and Public Health</p> <p>Collins, Gary; University of Oxford Nuffield Department of Orthopaedics Rheumatology and Musculoskeletal Sciences, Centre for Statistics in Medicine</p> <p>Greenhawt, Matthew ; Children's Hospital Colorado</p> <p>Curran, Janet; IWK Health Centre, Pediatrics</p> <p>Zemek, Roger; University of Ottawa Faculty of Medicine, Department of Pediatrics and Emergency Medicine; Children's Hospital of Eastern Ontario Research Institute</p> <p>Schuh, Suzanne; The Hospital for Sick Children, Pediatrics</p> <p>Ellis, Anne; Queen's University, Division of Allergy and Immunology</p> <p>Gerdts, Jennifer; Food Allergy Canada</p> <p>Kreviazuk, Cheryl; Children's Hospital of Eastern Ontario Research Institute</p> <p>Dixon, Andrew; Stollery Children's Hospital, Emergency Medicine</p> <p>Eltorki, Mohamed; McMaster Children's Hospital</p> <p>Freedman, Stephen; University of Calgary Cumming School of Medicine, Departments of Pediatrics and Emergency Medicine, Alberta Children's Hospital</p> <p>Gravel, Jocelyn; Centre Hospitalier Universitaire Sainte-Justine</p> <p>Poonai, Naveen; Western University, Departments of Paediatrics, Internal Medicine, Epidemiology &amp; Biostatistics</p> <p>Worm, Margitta; Charite Universitätsmedizin Berlin, Division of Allergy and Immunology, Department of Dermatology and Allergy</p> <p>Plint, Amy; University of Ottawa Faculty of Medicine, Department of Pediatrics and Emergency Medicine; Children's Hospital of Eastern Ontario Research Institute</p> |
| <b>Primary Subject Heading</b>: | Emergency medicine                                                                                                                                                                                                                                                                                                                                                                                                                                                                                                                                                                                                                                                                                                                                                                                                                                                                                                                                                                                                                                                                                                                                                                                                                                                                                                                                                                                                                                                                                                                                                                                                                                                                                                                                                                                                                                                                                                                                                                                       |
| Secondary Subject Heading:      | Paediatrics                                                                                                                                                                                                                                                                                                                                                                                                                                                                                                                                                                                                                                                                                                                                                                                                                                                                                                                                                                                                                                                                                                                                                                                                                                                                                                                                                                                                                                                                                                                                                                                                                                                                                                                                                                                                                                                                                                                                                                                              |

1  
2  
3  
4  
5  
6  
7  
8  
9  
10  
11  
12  
13  
14  
15  
16  
17  
18  
19  
20  
21  
22  
23  
24  
25  
26  
27  
28  
29  
30  
31  
32  
33  
34  
35  
36  
37  
38  
39  
40  
41  
42  
43  
44  
45  
46  
47  
48  
49  
50  
51  
52  
53  
54  
55  
56  
57  
58  
59  
60

|           |                                                                             |
|-----------|-----------------------------------------------------------------------------|
| Keywords: | PAEDIATRICS, Paediatric A&E and ambulatory care < PAEDIATRICS, EPIDEMIOLOGY |
|           |                                                                             |

SCHOLARONE™  
Manuscripts

**TITLE PAGE****Title:**

Canadian Anaphylaxis Network- Predicting Recurrence after Emergency Presentation for Allergic REaction (CAN-PREPARE): A Prospective, Cohort Study Protocol

**Authors:**

Waleed Alqurashi, MD, MSc<sup>1,2\*</sup>; Marcus Shaker, MD, MSc<sup>3</sup>; George A. Wells, PhD<sup>4,5</sup>; Gary S. Collins, PhD<sup>6</sup>; Matthew Greenhawt, MD, MBA<sup>7</sup>; Janet Curran, PhD, RN<sup>8</sup>; Roger Zemek, MD<sup>1,2</sup>; Suzanne Schuh, MD<sup>9</sup>; Anne Ellis, MD, MSc<sup>10</sup>; Jennifer Gerdts, BComm<sup>11</sup>; Cheryl Kreviazuk, BA<sup>2</sup>; Andrew Dixon, MD<sup>12</sup>; Mohamed Eltorki, MBChB<sup>13</sup>; Stephen B. Freedman, MDCM, MSc<sup>14</sup>; Jocelyn Gravel, MD, MSc<sup>15</sup>; Naveen Poonai, MD, MSc<sup>16</sup>; Margitta Worm, MD<sup>17</sup>; Amy C. Plint, MD, MSc<sup>1,2</sup>; Pediatric Emergency Research Canada (PERC).

**Affiliations:**

1 Department of Pediatrics and Emergency Medicine, Faculty of Medicine, University of Ottawa, 451 Smyth Road, Ottawa, Ontario, Canada, K1H 8M5

2 Children's Hospital of Eastern Ontario Research Institute, 401 Smyth Road, Ottawa, Ontario, Canada, K1H 8L1

3 Children's Hospital at Dartmouth, Section of Allergy and Clinical Immunology, 1 Medical Center Drive, Lebanon, New Hampshire, United States, 03756

4 Cardiovascular Research Methods Centre, University of Ottawa Heart Institute, 40 Ruskin Street, Ottawa, Ontario, Canada, K1Y 4W7.



1  
2  
3 5 School of Epidemiology and Public Health, University of Ottawa, 600 Peter Morand Crescent,  
4  
5  
6 Ottawa, Ontario, Canada, K1G 5Z3

7  
8 6 Centre for Statistics in Medicine, Nuffield Department of Orthopaedics, Rheumatology, and  
9  
10 Musculoskeletal Sciences, Windmill Road, University of Oxford, Oxford, UK, OX3 7LD

11  
12 7 Children's Hospital Colorado, 13123 East 16<sup>th</sup> Avenue, Aurora, Colorado, United States,  
13  
14  
15 80045

16  
17 8 IWK Health Centre, 5850 University Avenue, Halifax, Nova Scotia, Canada, B3K 6R8

18  
19 9 Hospital for Sick Children, 555 University Avenue, Toronto, Ontario, Canada, M5G 1X8

20  
21 10 Division of Allergy and Immunology, Department of Medicine, Queen's University, 15 Arch  
22  
23 Street, Kingston, Ontario, Canada, K7L 3N6

24  
25  
26 11 Food Allergy Canada, 505 Consumers Road, Toronto, Ontario, Canada, M2J 4V8

27  
28 12 Stollery Children's Hospital, 8440-112 Street, Edmonton, Alberta, Canada, T6G 2C8

29  
30 13 McMaster Children's Hospital, 1200 Main Street West, Hamilton, Ontario, Canada, L8S 4L8

31  
32 14 Departments of Pediatrics and Emergency Medicine, Alberta Children's Hospital, Cumming  
33  
34 School of Medicine, University of Calgary, 28 Oki Drive NW, Calgary, Alberta, Canada, T3B  
35  
36  
37 6A8

38  
39  
40 15 Centre Hospitalier Universitaire Sainte-Justine, Université de Montréal, 3175 Chemin de la  
41  
42 Cote-Ste-Catherine, Montréal, Québec, Canada, H3T 1C5

43  
44 16 Departments of Paediatrics, Internal Medicine, Epidemiology & Biostatistics, Western  
45  
46 University, 800 Commissioners Road East, London, Ontario, Canada, N6A 5W6

47  
48 17 Division of Allergy and Immunology, Dpt Dermatology and Allergy, Charité –  
49  
50  
51 Universitätsmedizin Berlin, Charitéplatz 1, D - 10117 Berlin, Berlin, Germany

**Corresponding Author:**

Waleed Alqurashi

Children's Hospital of Eastern Ontario (CHEO), 401 Smyth Road, Ottawa, ON, K1H 8L1

Phone: 613-737-7600 ext. 3799

Email: [walqurashi@cheo.on.ca](mailto:walqurashi@cheo.on.ca)

ORCID ID: <https://orcid.org/0000-0001-9772-5291>

**Keywords:** Paediatrics; Paediatric A&E and ambulatory care; Epidemiology

**Trial Protocol Version** 2-Feb-2022

**Trial Registration:** Clinicaltrials.gov NCT05135377

**Word Count:** 3269 / 4000 words

**ABSTRACT:****Introduction**

Anaphylaxis is a severe, potentially fatal multi-organ system manifestation of an allergic reaction. The highest incidence of anaphylaxis is in children and adolescents. Biphasic anaphylaxis (BA) is defined as the recurrence of allergic symptoms after resolution of an initial reaction. It has been reported to occur in 10-20% of cases within 1-48 hours from the onset of the initial reaction. The dilemma for physicians is determining which patients with resolved anaphylaxis should be observed for BA, and for how long. Guidelines for duration of post-anaphylaxis monitoring vary, are based on limited evidence, and can have unintended negative impacts on patient safety, quality of life, and healthcare resources. The objectives of this study are to derive a prognostic model for BA and to develop a risk-scoring system that informs disposition decisions of children who present to emergency departments (ED) with anaphylaxis.

**Methods and Analysis**

This prospective multi-centre cohort study will enroll 1,682 patients from seven pediatric EDs that are members of the Pediatric Emergency Research Canada network. We will enroll patients younger than 18 years of age with an allergic reaction meeting anaphylaxis diagnostic criteria. Trained ED research assistants will screen, obtain consent, and prospectively collect study data. Research assistants will follow patients during their ED visit and ascertain, in conjunction with the medical team, if the patient develops BA. A standardized follow-up survey conducted following study enrollment will determine if a biphasic reaction occurred after ED disposition. Model development will conform to the broad principles of the PROGRESS (Prognosis Research Strategy) framework and reporting will follow the TRIPOD Statement.

### **Ethics and Dissemination**

Ethics approval has been received from all participating centres. Our dissemination plan focuses on informing clinicians, policy-makers, and parents of the results through publication in peer-reviewed journals and broadcasting on multiple media platforms.

### **Registration Details**

ClinicalTrials.gov (NCT05135377).

For peer review only

**Article Summary:**

Strengths and limitations of this study:

- 1) Largest prospective cohort study on pediatric biphasic anaphylaxis conducted to-date.
- 2) Sample size calculation and statistical analysis plan are based on the highest methodological standard for prediction modelling research.
- 3) We established an international, multidisciplinary expert team encompassing pediatrics, emergency medicine, allergy/immunology, research methodology and statistics, and knowledge translation.
- 4) We instituted an advisory council of external parents, youth, and clinicians end-users and community partners to monitor milestones, identify potential barriers and enablers for future implementation, and guide future decision aid tools.
- 5) This study is not designed to generalize our findings to settings outside of an academic pediatric emergency department; this limitation may be mitigated when we yield a clinically useful and statistically sensitive model that may be externally validated.

## INTRODUCTION:

Anaphylaxis is the most severe form of allergic reaction that rapidly affects multiple body systems and can be fatal.[1,2] The highest incidence is in children and adolescents.[3–8] In Canada, approximately every 10 minutes, there is an Emergency Department (ED) visit for food allergy.[9,10] Up to 80% of anaphylactic reactions in children are triggered by food,[11] and 8% of allergy-related ED visits are due to anaphylactic shock.[3]

According to the Canadian Institute for Health Information, the rate of children visiting Ontario and Alberta EDs for anaphylaxis more than doubled between 2007 and 2014.[3] Among 13- to 17-year-olds, ED visits increased significantly (from 23/100,000 in 2007 to 59/100,000 in 2014). The highest annual rate of ED visits was among children aged 4 and younger.[3] Similarly, the Cross-Canada Anaphylaxis Registry reported a steady increase in pediatric ED visits: from 1.8/1000 in 2011 to 4.5/1000 in 2015.[10,12] These estimates are higher than data from the US and Europe.[13,14]

As the volume of anaphylaxis-related ED visits continues to rise,[10,12] ambiguity in how physicians manage anaphylaxis increases the healthcare burden and may contribute to ED crowding. Current Canadian and international guidelines recommend that all patients with anaphylaxis present to the ED, and after initial reactions have been treated, remain there for a prolonged period to be monitored for biphasic anaphylaxis (BA, also called delayed or late-phase anaphylaxis).[15–17] BA is a second wave of symptoms after initial resolution.[18,19] The reported incidence of this potentially serious phenomenon varies from 10-20%; the majority occur within 1-24 hours from onset of the initial reaction.[16–47] However, these studies vary

1  
2  
3 considerably in their design (prospective vs retrospective), enrolled population (adults vs  
4 children or mixed), settings (emergency departments vs outpatient allergy clinics), and definition  
5 and severity of anaphylaxis and biphasic reaction. Recent systematic review and meta-analyses  
6 [48–50] underline these epidemiological factors that explain the significant clinical heterogeneity  
7 between previous observational studies. This inconsistency of the literature creates dilemma for  
8 ED physicians in deciding which patients should be observed and the optimum duration of  
9 observation.[51] As a result, guidelines for post-anaphylaxis care vary,[1,16,17] are based on  
10 poor or little evidence, and have negative impacts on patient safety and quality of  
11 life.[18,36,52,53] This clinical uncertainty originates from the lack of validated clinical  
12 predictors for BA. Consequently, many children are hospitalized or undergo prolonged  
13 monitoring in the ED after resolution of initial anaphylaxis.[53,54]

14  
15  
16  
17  
18  
19  
20  
21  
22  
23  
24  
25  
26  
27  
28  
29  
30  
31 In the United States, ED care and hospitalizations are the largest drivers of annual direct medical  
32 costs (\$1.9 billion) for food allergic children.[55] The incremental cost of extended ED  
33 observation of resolved anaphylaxis (6 hours versus 1 hour) is \$62,374 USD per case of BA  
34 identified (\$68,411 USD from the societal perspective). ED monitoring beyond 6 hours of  
35 patients who quickly stabilize after treatment is associated with an incremental cost-effectiveness  
36 ratio of \$230,202 per case observed (societal perspective).[56] As ED crowding and visits for  
37 anaphylaxis increase, current post-anaphylaxis clinical practice is neither sustainable nor cost-  
38 effective.[29]

39  
40  
41  
42  
43  
44  
45  
46  
47  
48  
49  
50  
51 Providing the best evidence-based value care at the lowest cost is critical to optimize resource  
52 stewardship and eliminate wasteful spending in healthcare. In alignment with national and  
53

1  
2  
3 international research priorities,[57–61] our goal is to derive a prognostic clinical prediction  
4 model that identifies children with anaphylaxis who are at heightened risk of BA. This model  
5 will address a gap in current knowledge and practice, with anticipated benefits for patient care  
6 and health system efficiency worldwide.  
7  
8  
9  
10  
11  
12  
13

## 14 **METHODS AND ANALYSIS:**

### 15 **Study Design**

16  
17  
18 We will conduct a prospective multi-centre cohort study. Prospective data collection is necessary  
19 to minimize research waste in prediction modelling, accurately assess the risk and impact of BA  
20 on patients and the healthcare system, and derive a clinically useful prediction rule. Our design  
21 ensures consistency and precision of data collection of all clinically relevant potential predictors  
22 and enables accurate assessment of critical outcomes. Our methods follow established guidelines  
23 for developing clinical prediction rules.[62–71] We conform to the PROGRESS (Prognosis  
24 Research Strategy) methods of prediction modelling.[69,72–74]  
25  
26  
27  
28  
29  
30  
31  
32  
33  
34  
35  
36  
37  
38  
39

### 40 **Study Population**

41 All children aged 0–17 years who present to a participating ED will be screened for study  
42 enrollment based on the following criteria:  
43  
44  
45  
46  
47  
48

### 49 **Inclusion Criteria**

- 50 1. Age < 18 years  
51  
52  
53  
54  
55  
56  
57  
58  
59  
60



2. Presenting to ED with an allergic reaction that matches diagnostic criteria for anaphylaxis as defined by the World Allergy Organization (WAO) in 2019.[75] *Anaphylactic reaction* is a multi-system allergic reaction characterized by one or more clinical features involving the respiratory or cardiovascular systems and associated with one or more clinical features involving the skin or gastrointestinal tract. These criteria are universally accepted and endorsed by most international allergy and emergency medicine organizations.[15,57,76] The 2019 WAO guidelines clarify the involvement of two organ systems is not always requisite for diagnosis: "Although the diagnosis of anaphylaxis usually depends on the involvement of multiple organ systems, anaphylaxis may present as an acute cardiac or respiratory event as the only manifestation of anaphylaxis." [75] Thus, an individual with isolated hypotension, bronchospasm, or upper airway obstruction after exposure to a known or potential trigger will be deemed to have anaphylaxis, even if typical skin features are absent.[75,77]
3. Language proficiency in English or French

### **Exclusion Criteria**

1. Anaphylactic reaction that occurred in the context of a suicidal attempt or intoxication.
2. Anaphylactic reaction that began in hospital and managed outside the ED (inpatient or outpatient unit)
3. Inability or unwillingness of individual and/or caregiver to complete the follow-up surveys post ED discharge.

## Study Setting

Between April 2022 and June 2024, the study will enrol participants in EDs from seven hospitals: CHU Sainte-Justine, Children's Hospital of Eastern Ontario, Hospital for Sick Children, McMaster Children's Hospital, Children's Hospital – London Health Sciences Centre, Alberta Children's Hospital, and Stollery Children's Hospital. These EDs are members of Pediatric Emergency Research Canada (PERC; <https://www.perc-canada.ca>)[78]. Research staff will follow site-specific Research Ethics Boards' (REB) guidelines for approaching potential participants and families for research studies, screening for eligibility, and obtaining consent.

## Outcome

The primary outcome is development of BA. As per the recently published consensus definition,[79] to be classified as BA, an anaphylactic reaction must meet three criteria: 1) initial anaphylactic reaction followed by resolution of all initial manifestations for  $\geq 1$  hour, with no new symptoms or treatment administered in that time; 2) second phase of new or recurrent symptoms or signs that meet the consensus definition of anaphylaxis occurring within 1-48 hours from complete resolution of initial symptoms or signs; and 3) new or recurrent symptoms or signs not caused by antigen re-exposure.[35] We will capture any new or recurrent symptoms or signs, but only clinical manifestations that meet diagnostic criteria for anaphylaxis will be defined as **anaphylactic biphasic responses**. This definition focuses on *clinically important* or major biphasic reactions.[29,30] Mild symptoms that involve only the skin (e.g., urticarial rash) will be captured and classified as minor biphasic responses, but they do not meet our case definition for BA.

## Data collection in ED

A research assistant (RA) or research nurse (RN) in the ED will approach potential participants to screen for eligibility and provide a study overview. When the pre-screen has been completed, the RA/RN will consult with the attending physician to confirm that the symptoms are consistent with anaphylaxis. If the attending physician considers the signs and symptoms to be more in line with another diagnosis (e.g., gastroenteritis), the patient will be excluded. After confirming participant eligibility, the RA/RN will obtain written informed consent (and assent as appropriate) and proceed with data collection. Table 1 lists the independent variables that will be collected.

**Table 1:** Data collection variables

|                                                                       |                                                                                                                                                                                                                                                                                                                                                                                                                                                                                                                                                                                             |
|-----------------------------------------------------------------------|---------------------------------------------------------------------------------------------------------------------------------------------------------------------------------------------------------------------------------------------------------------------------------------------------------------------------------------------------------------------------------------------------------------------------------------------------------------------------------------------------------------------------------------------------------------------------------------------|
| <b>From clinical history</b>                                          | <ul style="list-style-type: none"> <li>• Demographics: age, sex, date of birth, and self-identified race</li> <li>• Past medical history (e.g., cardiac disease, bronchial asthma, eczema)</li> <li>• Previous ED visits for anaphylaxis</li> <li>• Current anaphylaxis augmenting factors (e.g., physical exercise, viral illness or fever, menses in female, drugs such as non-steroidal anti-inflammatory drugs (NSAID), antacid, <math>\beta</math>-blockers, and ACE inhibitors)</li> <li>• Allergen trigger (e.g., type, time of exposure and onset of symptoms, location)</li> </ul> |
| <b>From physical examination</b>                                      | <ul style="list-style-type: none"> <li>• Participant weight</li> <li>• Vital signs at triage (heart rate, respiratory rate, blood pressure, and oxygen saturation)</li> <li>• Triage score (based on Canadian Pediatric Triage and Acuity Scale)</li> <li>• Physical exam findings upon arrival at ED</li> </ul>                                                                                                                                                                                                                                                                            |
| <b>From pre-hospital and initial ED intervention, and disposition</b> | <ul style="list-style-type: none"> <li>• Treatment interventions (e.g., epinephrine, bronchodilators, etc.) received before arrival at ED and during transport by paramedics (if applicable)</li> <li>• Non-pharmacologic/supportive interventions (such as intubation and intravenous fluids) and timeline</li> <li>• Pharmacologic interventions (including dose, route, frequency, and time administered)</li> <li>• Disposition time, location (home or hospitalization), list of discharge medications, and outpatient allergy referral</li> </ul>                                     |
| <b>From ED monitoring</b>                                             | <ul style="list-style-type: none"> <li>• Presence and description of new/recurrent</li> </ul>                                                                                                                                                                                                                                                                                                                                                                                                                                                                                               |

|                                                             |                                                                                                                                                                                                                                                                             |
|-------------------------------------------------------------|-----------------------------------------------------------------------------------------------------------------------------------------------------------------------------------------------------------------------------------------------------------------------------|
| <b>period</b>                                               | symptoms/signs <ul style="list-style-type: none"> <li>• Time of new recurring symptoms/signs</li> <li>• Management interventions given for biphasic reaction</li> </ul>                                                                                                     |
| <b>From follow-up email/phone call after ED disposition</b> | <ul style="list-style-type: none"> <li>• Presence and description of new/recurrent symptoms/signs</li> <li>• Time of new/recurrent symptoms/signs</li> <li>• Management interventions given for biphasic reaction, including visits to ED/primary care providers</li> </ul> |
| <b>From 6-month follow-up (if applicable)</b>               | <ul style="list-style-type: none"> <li>• If patient was seen by Allergist</li> <li>• If seen by Allergist, was allergic agent identified?</li> </ul>                                                                                                                        |

The RA/RN will review the physical exam findings with the clinical team (treating ED physician/bedside nurse). Because anaphylaxis is a clinical diagnosis, participants or caregivers will be asked about the spectrum of symptoms and signs experienced before and upon arrival in the ED. The RN/RA will verbally administer a structured questionnaire to participants or caregivers to collect demographics, medical history, risk factors, reaction characteristics, and symptoms. Information from the participant and from the medical record about treatment before and after ED arrival, and biphasic anaphylaxis events during the ED monitoring period, will be captured by the RN/RA. Missing data will be obtained by questioning the participant, caregiver, or treating ED team. To capture all BA events and ascertain symptom recurrence while participants are being monitored, the research RN/RA will follow the participant/caregiver throughout the ED visit. Events occurring outside study team hours will be captured in the follow-up questionnaire.

### **First follow-up after ED discharge or hospital admission**

Published data have reported symptom recurrence up to 48 hours from anaphylaxis onset.[28,44]

We will contact participants by telephone or email 2-5 days after enrollment to complete a standardized questionnaire that will capture the nature and timing of new and recurrent

1  
2  
3 symptoms or signs, follow-up with health providers, return ED visits, and treatments received.  
4  
5 Events that took place in-hospital, but were not previously captured by the study team (e.g.,  
6  
7 outside study team hours), will be verified from the participant's medical chart.  
8  
9  
10

### 11 12 **Second follow-up after ED discharge or hospital admission** 13

14 Participants whose anaphylaxis trigger or culprit allergen was unknown at the time of study  
15 enrollment will be contacted 6-9 months after enrollment. We will determine if the participant  
16 had been assessed by an allergy specialist in the interim, and if so, whether an allergic agent had  
17 been identified.  
18  
19  
20  
21  
22  
23  
24  
25

### 26 **Strategies for retention** 27

28 For the follow-up survey, the families of participants will be asked: (1) their preferred mode of  
29 contact (email or telephone), and (2) the best time to reach them and contact number. Based on  
30 their preferences, we will send the follow-up questionnaire as an automated REDCap survey to  
31 the parent/caregiver email address or administer the survey by telephone. If the e-survey is not  
32 completed within 24 hours, a second email will be sent. If there is no response to a second email,  
33 experienced staff will contact the participant for a telephone interview. A similar schedule of  
34 repeat calls will be used to reach those who selected telephone follow-up.  
35  
36  
37  
38  
39  
40  
41  
42  
43  
44  
45

### 46 **Sample Size** 47

48 Based on our research[35,48,49], estimates from prospective ED studies [28,44,45,96] and  
49 published data from large adult and pediatric studies,[80,81] 10% is a conservative estimate of  
50 the population-wide event rate of BA. Our systematic reviews of potential predictors [48] and  
51  
52  
53  
54  
55  
56  
57  
58  
59  
60

1  
2  
3 other relevant studies identified 19 potential predictive variables.[82] Recent *BMJ* and *Stat in*  
4  
5 *Med* articles offer practical guidance for calculating the sample size required for the development  
6  
7 of clinical prediction models.[83,84] Following these guidelines, we considered sample size from  
8  
9 four perspectives, with the largest being selected as the sample size needed. The four calculations  
10  
11 are based on: the approximate 95% confidence interval for the overall outcome proportion 0.10  
12  
13 in the study population (calculated sample size needed n=139); the mean absolute prediction  
14  
15 error of the average error in the model's outcome (n=274); achievement of an expected uniform  
16  
17 shrinkage factor of  $\leq 10\%$  (n=1,529); and ensuring a small, expected optimism in the apparent  
18  
19 proportion of overall variation explained  $R^2$  (n=719). Details of these calculations with the  
20  
21 selection of the parameter estimates and sensitivity considerations are provided in  
22  
23  
24  
25 **Supplementary Material A.** Taking the largest sample size that meets all four criteria, we need  
26  
27 to enroll 1,529 participants with anaphylaxis. Based on previous studies by our network, we  
28  
29 anticipate 10% loss to follow-up.[85,86] Thus, our estimated sample size is 1,682 participants.  
30  
31  
32  
33  
34

### 35 **Dependent Predictors Selection for Analysis**

36  
37 Table 2 lists the 19 candidate-dependent predictors that we will include in the analysis. We chose  
38  
39 these 19 variables based on clinical studies of predictors of BA by our team and by others,[16–  
40  
41 47] two systematic reviews,[48,50] the meta-analysis from the 2020 anaphylaxis practice  
42  
43 parameter,[49] and clinical experience. These predictors encompass recently published BA  
44  
45 predictors from the European Anaphylaxis Registry retrospective data.[87] Given the direct  
46  
47 association between initially severe anaphylaxis and subsequent BA, we also include risk factors  
48  
49 of severe anaphylaxis.[88]  
50  
51  
52  
53  
54  
55  
56  
57  
58  
59  
60

**Table 2:** Candidate-dependent predictors that will be included in the analysis for primary objective of study, based on previous clinical studies on BA predictors

| Allergen predictors                                                                                                                                                         | Patient predictors                                                                  |
|-----------------------------------------------------------------------------------------------------------------------------------------------------------------------------|-------------------------------------------------------------------------------------|
| Peanut trigger [87]                                                                                                                                                         | Age [34,35,38,88]                                                                   |
| Venom trigger [88]                                                                                                                                                          | Male sex [88,89]                                                                    |
| Drug trigger [11,49,88–92]                                                                                                                                                  | Previous anaphylaxis [31,36,39]                                                     |
| Unknown trigger [31,39,49,50,87]                                                                                                                                            | Pre-existing asthma or chronic lung disease [26,28,42,47,88,89,91]                  |
| ≥30 min from exposure to trigger to onset of symptoms [43,87]                                                                                                               | Exercise as co-factor for anaphylaxis [1,88,93–96]                                  |
| Disease predictors                                                                                                                                                          | Treatment predictors                                                                |
| Signs of severe anaphylaxis* [22,23,25,27,34,38,49,50,97]                                                                                                                   | Treatment of initial reaction with >1 dose of epinephrine [22,23,35,42,45,46,49,98] |
| Wide pulse pressure [49,98]                                                                                                                                                 | Treatment of initial reaction with epinephrine [34,35,44,99]                        |
| Respiratory distress or wheezing [31,35,100]                                                                                                                                | Systemic steroids [44,49]                                                           |
| Gastrointestinal manifestations [50,87]                                                                                                                                     | Epinephrine administration >60 min from onset of reaction [20,26,35,39,101,102]     |
| Cutaneous manifestations [69, 73]                                                                                                                                           |                                                                                     |
| *Include (as defined by Brown's severity grading score)[103]: cyanosis or SpO <sub>2</sub> ≤ 92%, hypotension, confusion, collapse, loss of consciousness, or incontinence. |                                                                                     |

### Data analysis

The statistical analysis will be performed using R statistical software version 4.0.5 (R Core Team, Vienna, Austria)[104]. Descriptive analysis will be used to summarize baseline participant demographics, anaphylaxis clinical manifestations, and management characteristics. Although race and indigenous status will be collected as demographic characteristics, we will not perform race-based analysis; these variables will be used as descriptors to demonstrate the diversity and representativeness of our sample.

Multivariable regression analysis will be used to derive a predictive model for BA. As recommended by Royston *et al.*[105], our modelling strategy will follow six steps.

- 1) *Evaluate data quality.* Predictors found to be complete (<10% missing data) will be used in a full model approach. Missing data will be considered Missing at Random. If any potential predictor has >10% missing value, a multiple imputation procedure will be followed to replace these values.[64,67] If >50% data are missing, the variable will be omitted from the analysis.
- 2) *Handle and model continuous predictors.* To maximize the predictive ability of the regression model, we will maintain continuous variables such as age.[106,107] A multivariable fractional polynomial procedure will be used to identify and model nonlinear continuous variables. Our a priori categorization of some originally continuous predictors, such as “time to epinephrine treatment,” is based on plausible clinical and basic science research [48,108,109] and recent regression analysis.[39]
- 3) *Develop final model (predictor selection).* Predictors that match the above two criteria will be entered in a “full model” that contains the main effects of all candidate predictors. The objective of predictors reduction is to find the best combinations of variables for accurate prediction (low mean squared error) in a model that is easy for clinicians to use and that contains as few variables as possible. Therefore, we will assess for collinearity and use shrinkage technique as a method of variable reduction.[71] Collinearity between predictors will be evaluated with correlation coefficient ( $r$ ) and variance inflation factors (VIF), which measure the degree to which collinearity degrades the precision of estimate coefficients. Strongly correlated predictors ( $r > 0.8$ , or  $VIF > 10$ ) will be combined in a single variable. In accordance with Harrell and Steyerberg, we will use Penalized maximum likelihood (PML)



1  
2  
3 estimation to perform shrinkage reduction (reduction of the regression coefficients to  
4 improve prediction quality). Maximizing a modified Akaike's Information Criterion will be  
5 used to choose the optimal penalty factor for PML and select the best model. This approach  
6 includes a penalty against large models to deal with the trade-off between overfitting and  
7 model simplicity.[105] The added benefit of this approach is that we could use more penalty  
8 factor if we found significant interaction.  
9

10  
11  
12  
13  
14  
15  
16  
17 4) *Assess model performance with three measures* [67,110,111]  
18

- 19  
20 a. *Calibration* refers to the accuracy of absolute risk estimates.[110] Model  
21 calibration will be assessed by calibration slope, and graphically, by locally  
22 weighted scatterplot smoothing (LOESS) plots of observed versus predicted  
23 probabilities of the outcome. The slope of the calibration curve is a measure of  
24 over-optimism of the model predictions.  
25  
26 b. *Discrimination* will be assessed by the receiver operating characteristics curve  
27 and the concordance (C) index, which measures how well the model discriminates  
28 between participants with and without BA.  
29  
30 c. *Clinical usefulness* of the prediction model will be assessed using net benefit as a  
31 decision analytic.[111,112] The derived prediction rule will be cross-validated by  
32 comparing the classification of each participant with their actual primary outcome  
33 status.  
34  
35  
36  
37  
38  
39  
40  
41  
42  
43  
44  
45  
46

47 5) *Validate model*  
48

- 49 i. *Internal validation.* Recruiting from geographically separated sites enhances  
50 generalizability and supports internal validation of the model.[64,113,114] To correct  
51  
52  
53  
54  
55  
56  
57  
58  
59  
60

1  
2  
3 for overfitting and quantify optimism in model performance, our model will be  
4  
5 validated internally using bootstrapping through the following steps: [106,115,116]  
6  
7  
8 1) After developing the prediction model using the entire original sample and  
9  
10 determining apparent performance, we will generate a bootstrap sample by sampling  
11  
12 individuals with replacement from the original sample; 2) Develop a model using the  
13  
14 bootstrap sample (applying the same modelling and predictor selection in step 3 above);  
15  
16 3) Determine the apparent bootstrap performance of this model (performance of  
17  
18 bootstrap model in the original sample and calculate the optimism as the difference  
19  
20 between bootstrap performance and test performance); 4) Repeat steps 1 through 3 at  
21  
22 least 500 times; and 5) Average the estimates of optimism in step 4, and subtract the  
23  
24 value from the apparent performance obtained in step 1 to obtain an optimism-corrected  
25  
26 estimate of performance.  
27  
28  
29

30  
31 ii. *External validation*: Before broad clinical implementation, our derived rule requires  
32  
33 external validation. Lack of external validation is a limitation of many clinical  
34  
35 prediction models.[48,117] For two reasons, this proposal focuses only on model  
36  
37 derivation: 1) Requesting funding for external validation may be premature. Before  
38  
39 embarking on external validation, we need proof that our *a priori* risk factors yield a  
40  
41 clinically useful and statistically sensitive model. 2) The validation phase should be  
42  
43 broader, in different settings, with other participants, and with different  
44  
45 clinicians.[118,119] Our ultimate goal is to validate our model and risk score in an  
46  
47 international setting. Such validation is feasible because PERC is a member of the  
48  
49 Pediatric Emergency Research Networks (PERN), and member networks have a history  
50  
51 of collaboration.[85,86,120]  
52  
53  
54  
55  
56  
57  
58  
59  
60

1  
2  
3 6) *Present model*. As described by Sullivan *et al.*[121], we will use the regression coefficient in  
4 our final fitted model to generate a clinical decision rule that enables point-of-care risk  
5 assessment of BA. To develop a points score system, we will follow the steps described in a  
6 recent *BMJ* paper: [122] 1) Multiply and round regression coefficients of binary predictors;  
7 2) Search for score for continuous predictors to determine the difference in regression units;  
8 3) Estimate multiplication factor for the scores; 4) Use decision curve analysis to assign  
9 participants to risk groups and quantify any deterioration in discriminative performance; and  
10 5) Present accompanying table of probabilities to allow points score to be translated into a  
11 predicted risk. The anticipated stoplight scoring system (green=low→discharge;  
12 yellow=moderate→monitor in ED/preference-sensitive care; red=high→admit to hospital)  
13 will inform evidence-based disposition decisions by clinicians and anticipatory guidance to  
14 families.  
15  
16  
17  
18  
19  
20  
21  
22  
23  
24  
25  
26  
27  
28  
29  
30  
31  
32

### 33 **Patient and Public Involvement**

34 Patients and/or the public were involved in the design and dissemination plans for this research.  
35  
36 To promote uptake of our results, potential knowledge users have been and will be engaged  
37 throughout the project.[123] We have a multi-phase approach to maximize collaboration and  
38 opportunities for diverse knowledge users to interact at various research phases.[124] Our multi-  
39 site team includes ED clinicians as typical end-users and champions for future implementation.  
40  
41 We have established an advisory council of external end-users (parents, youth, ED clinicians)  
42 and community partners (Food Allergy Canada, Canadian Society of Allergy & Clinical  
43 Immunology) to monitor milestones, identify potential barriers and enablers for future  
44 implementation, and guide future decision aids study. The leadership team at Food Allergy  
45  
46  
47  
48  
49  
50  
51  
52  
53  
54  
55  
56  
57  
58  
59  
60

1  
2  
3 Canada has reviewed and supports this proposal. To improve study operation and minimize the  
4  
5 burden on patients and families, we sought feedback from the Patients and Families Advisory  
6  
7 Committee at the Children's Hospital of Eastern Ontario Research Institute.  
8  
9

## 10 11 12 **ETHICS AND DISSEMINATION:** 13

### 14 15 16 17 **Ethics** 18

19 Ethics approval has been received from all recruiting centers. Written informed consent, and/or  
20  
21 assent when appropriate, will be obtained from all participants or legal guardians.  
22  
23

24  
25  
26 The study is registered at ClinicalTrials.gov (NCT05135377). Results information from this  
27  
28 study will be submitted to ClinicalTrials.gov.  
29  
30

### 31 32 33 **End-of-grant KT (Knowledge Translation)** 34

35 ED personnel, providers, allergists, clinical researchers, administrators, and government policy-  
36  
37 makers can use our study outputs to improve healthcare delivery. KT will focus on informing  
38  
39 clinicians, other key user groups, and parents and participants. Our plan has three goals: increase  
40  
41 knowledge awareness, inform/change practice, and inform future research.[125,126]  
42  
43  
44

45  
46  
47 We have a powerful infrastructure to disseminate our results. Study investigators are senior  
48  
49 members of PERC and PERN, networks that include pediatric ED researchers worldwide (>100  
50  
51 hospitals across 6 PERN networks)[127], practicing clinicians, medical educators, and healthcare  
52  
53 administrators. PERC is closely tied to the TREKK (Translating Emergency Research  
54  
55  
56  
57  
58  
59  
60

1  
2  
3 Knowledge for Kids) Network of Centres of Excellence,[128] a partnership for knowledge  
4 exchange between general EDs and PERC sites. Our reporting/publication of the study results  
5 will conform to the Transparent Reporting of a Multivariable Prediction Model for Individual  
6 Prognosis or Diagnosis (TRIPOD) checklist.[116]  
7  
8  
9  
10  
11  
12  
13  
14  
15  
16  
17  
18  
19  
20  
21  
22  
23  
24  
25  
26  
27  
28  
29  
30  
31  
32  
33  
34  
35  
36  
37  
38  
39  
40  
41  
42  
43  
44  
45  
46  
47  
48  
49  
50  
51  
52  
53  
54  
55  
56  
57  
58  
59  
60

For peer review only

**ACKNOWLEDGEMENTS:**

We are grateful to the Patients and Family Advisory Committee at the Children's Hospital of Eastern Ontario Research Institute, and Food Allergy Canada for the insightful comments and feedback on the recruitment approach and data collection forms. We are also grateful to the following research coordinators and research managers for the operational support of the study at their institutions: Candice McGahern, Jena Shank, Judith Sweeney, Kamary Coriolano DaSilva, Patricia Candelaria, Redjana Carciumaru, and Stéphanie Pellerin.

**COMPETING INTERESTS STATEMENT:**

All authors have read and understood BMJ policy on declaration of interests and have no relevant interest to declare. Dr Amy C. Plint is supported by a Tier I University of Ottawa Research Chair. Dr. Stephen Freedman is supported by the Alberta Children's Hospital Professorship in Child Health and Wellness.

For peer review only

**FUNDING STATEMENT:**

This work is supported by the Canadian Institutes of Health Research (CIHR), grant number PJT-175057. This work is also supported by the Children's Hospital Academic Medical Organization (CHAMO) Innovation Fund, grant number N/A.

For peer review only



**AUTHORS' CONTRIBUTIONS:**

WA and ACP conceived the study idea. WA, ACP, and MS wrote the protocol with input from GAM, GSC, MG, JC, RZ, SS, AE, JG, CK, AD, ME, SBF, JG, NP, and MW. All authors provided input into the methodology and analysis plan. All authors approved the final protocol manuscript. ACP and GW are the supervisors of the study.

For peer review only

## REFERENCES:

- 1 Simons FER, Arduzzo LRF, Bilò MB, *et al.* World allergy organization guidelines for the assessment and management of anaphylaxis. *World Allergy Organ J* 2011;**4**:13–37. doi:10.1097/WOX.0b013e318211496c
- 2 Castells M. Diagnosis and management of anaphylaxis in precision medicine. *J Allergy Clin Immunol* 2017;**140**:321–33. doi:10.1016/j.jaci.2017.06.012
- 3 CIHI. Anaphylaxis and Allergy in the Emergency Department. 2015. [https://secure.cihi.ca/free\\_products/Anaphylaxis\\_Infosheet\\_en.pdf](https://secure.cihi.ca/free_products/Anaphylaxis_Infosheet_en.pdf) (accessed 18 Dec 2015).
- 4 Sheikh A, Hippisley-Cox J, Newton J, *et al.* Trends in national incidence, lifetime prevalence and adrenaline prescribing for anaphylaxis in England. *J R Soc Med* 2008;**101**:139–43. doi:10.1258/jrsm.2008.070306
- 5 Wood RA, Camargo Jr CA, Lieberman P, *et al.* Anaphylaxis in America: the prevalence and characteristics of anaphylaxis in the United States. *J Allergy Clin Immunol* 2014;**133**:461–7. doi:10.1016/j.jaci.2013.08.016
- 6 Tejedor-Alonso MA, Moro-Moro M, Múgica-García M V. Epidemiology of Anaphylaxis: Contributions From the Last 10 Years. *J Investig Allergol Clin Immunol* 2015;**25**:163–75.
- 7 Simons FER, Sampson HA. Anaphylaxis epidemic: fact or fiction? *J Allergy Clin Immunol* 2008;**122**:1166–8. doi:10.1016/j.jaci.2008.10.019
- 8 Lieberman P, Camargo Jr CA, Bohlke K, *et al.* Epidemiology of anaphylaxis: findings of the American college of allergy, asthma and immunology epidemiology of anaphylaxis working group. *Ann Allergy, Asthma Immunol* 2006;**97**:596–602. doi:10.1016/S1081-1206(10)61086-1
- 9 Statistics Canada. The Impact on Emergency Department Utilization of the CFHI Healthcare Collaborations and Initiatives. 2013. [https://www.cfhi-fcass.ca/sf-docs/default-source/reports/risk-analytica.pdf?sfvrsn=bd41df44\\_2](https://www.cfhi-fcass.ca/sf-docs/default-source/reports/risk-analytica.pdf?sfvrsn=bd41df44_2)
- 10 Hochstadter E, Clarke A, De Schryver S, *et al.* Increasing visits for anaphylaxis and the benefits of early epinephrine administration: a 4-year study at a pediatric emergency department in Montreal, Canada. *J Allergy Clin Immunol* 2016;**137**:1888. doi:10.1016/j.jaci.2016.02.016
- 11 Gabrielli S, Clarke A, Morris J, *et al.* Evaluation of prehospital management in a Canadian emergency department anaphylaxis cohort. *J Allergy Clin Immunol Pract* 2019;**7**:2232–8. doi:10.1016/j.jaip.2019.04.018
- 12 Lee AYM, Enarson P, Clarke AE, *et al.* Anaphylaxis across two Canadian pediatric centers: evaluating management disparities. *J Asthma Allergy* 2017;**10**:1. doi:10.2147/JAA.S123053
- 13 Motosue MS, Bellolio MF, Van Houten HK, *et al.* National trends in emergency department visits and hospitalizations for food-induced anaphylaxis in US children. *Pediatr Allergy Immunol* 2018;**29**:538–44. doi:10.1111/pai.12908
- 14 Grabenhenrich LB, Dölle S, Moneret-Vautrin A, *et al.* Anaphylaxis in children and adolescents: The European Anaphylaxis Registry. *J Allergy Clin Immunol* 2016;**137**:1128–1137.e1. doi:10.1016/j.jaci.2015.11.015
- 15 Canadian Society of Allergy and Clinical Immunology. Anaphylaxis in Schools & Other Settings. 2016. <http://csaci.ca/wp-content/uploads/2017/11/Anaphylaxis-in-Schools-Other-Settings-> (accessed 10 Dec 2016).

- 1  
2  
3 16 Lieberman P, Nicklas RA, Randolph C, *et al.* Anaphylaxis—a practice parameter update  
4 2015. *Ann Allergy, Asthma Immunol* 2015;**115**:341–84. doi:10.1016/j.anai.2015.07.019  
5 17 Muraro A, Roberts G, Worm M, *et al.* Anaphylaxis: guidelines from the European A  
6 cademy of Allergy and Clinical Immunology. *Allergy* 2014;**69**:1026–45.  
7 doi:10.1111/all.12437  
8  
9 18 Lieberman P. Biphasic anaphylactic reactions. *Ann Allergy, Asthma Immunol*  
10 2005;**95**:217–26. doi:10.1016/s1081-1206(10)61217-3  
11 19 Tole JW, Lieberman P. Biphasic Anaphylaxis: Review of Incidence, Clinical Predictors,  
12 and Observation Recommendations. *Immunol Allergy Clin North Am* 2007;**27**:309–26.  
13 doi:10.1016/j.iac.2007.03.011  
14  
15 20 Lertnawapan R, Maek-a-nantawat W. Anaphylaxis and biphasic phase in Thailand: 4-year  
16 observation. *Allergol Int* 2011;**60**:283–9. doi:10.2332/allergolint.10-OA-0256  
17 21 Orhan F, Canitez Y, Bakirtas A, *et al.* Anaphylaxis in Turkish children: A multi-centre,  
18 retrospective, case study. *Clin Exp Allergy* 2011;**41**:1767–76. doi:10.1111/j.1365-  
19 2222.2011.03859.x  
20  
21 22 Inoue N, Yamamoto A. Clinical evaluation of pediatric anaphylaxis and the necessity for  
22 multiple doses of epinephrine. *Asia Pac Allergy* 2013;**3**:106.  
23 doi:10.5415/apallergy.2013.3.2.106  
24  
25 23 Lee J, Garrett JPD, Brown-Whitehorn T, *et al.* Biphasic reactions in children undergoing  
26 oral food challenges. In: *Allergy and Asthma Proceedings*. 2013. 220–6.  
27 doi:10.2500/aap.2013.34.3669  
28  
29 24 Nagano C, Ishiguro A, Yotani N, *et al.* Anaphylaxis and biphasic reaction in a children  
30 hospital. *Japanese J Allergol* 2013;**62**:163–70.  
31 25 Vezir E, Erkoçoğlu M, Kaya A, *et al.* Characteristics of anaphylaxis in children referred to  
32 a tertiary care center. In: *Allergy and Asthma Proceedings*. 2013. 239–46.  
33 doi:10.2500/aap.2013.34.3654  
34  
35 26 Sampson HA, Mendelson L, Rosen JP. Fatal and Near-Fatal Anaphylactic Reactions to  
36 Food in Children and Adolescents. *N Engl J Med* 1992;**327**:380–4.  
37 doi:10.1056/nejm199208063270603  
38  
39 27 Liew WK, Chiang WC, Goh AE, *et al.* Paediatric anaphylaxis in a Singaporean children  
40 cohort: changing food allergy triggers over time. *Asia Pac Allergy* 2013;**3**:29.  
41 doi:10.5415/apallergy.2013.3.1.29  
42  
43 28 Brown SGA, Stone SF, Fatovich DM, *et al.* Anaphylaxis: clinical patterns, mediator  
44 release, and severity. *J Allergy Clin Immunol* 2013;**132**:1141–9.  
45 doi:10.1016/j.jaci.2013.06.015  
46  
47 29 Grunau BE, Li J, Yi TW, *et al.* Incidence of clinically important biphasic reactions in  
48 emergency department patients with allergic reactions or anaphylaxis. *Ann Emerg Med*  
49 2014;**63**:736–44. doi:10.1016/j.annemergmed.2013.10.017  
50  
51 30 Rohacek M, Edenhofer H, Bircher A, *et al.* Biphasic anaphylactic reactions: Occurrence  
52 and mortality. *Allergy Eur J Allergy Clin Immunol* 2014;**69**:791–7. doi:10.1111/all.12404  
53  
54 31 Lee S, Bellolio MF, Hess EP, *et al.* Predictors of Biphasic Reactions in the Emergency  
55 Department for Patients With Anaphylaxis. *J Allergy Clin Immunol Pract* 2014;**2**:281–7.  
56 doi:10.1016/j.jaip.2014.01.012  
57  
58 32 Oya S, Nakamori T, Kinoshita H. Incidence and characteristics of biphasic and protracted  
59 anaphylaxis: evaluation of 114 inpatients. *Acute Med Surg* 2014;**1**:228–33.  
60 doi:10.1002/ams2.48

- 1  
2  
3 33 Sricharoen P, Sittichanbuncha Y, Wibulpolprasert A, *et al*. What clinical factors are  
4 associated with biphasic anaphylaxis in Thai adult patients? *Asian Pacific J Allergy*  
5 *Immunol* 2015;**33**:8–13. doi:10.12932/AP0477.33.1.2015  
6  
7 34 Manuyakorn W, Benjaponpitak S, Kamchaisatian W, *et al*. Pediatric anaphylaxis: triggers,  
8 clinical features, and treatment in a tertiary-care hospital. *Asian Pac J Allergy Immunol*  
9 2015;**33**:281–8.  
10  
11 35 Alqurashi W, Stiell I, Chan K, *et al*. Epidemiology and clinical predictors of biphasic  
12 reactions in children with anaphylaxis. *Ann Allergy, Asthma Immunol* 2015;**115**:217-  
13 223.e2. doi:10.1016/j.anai.2015.05.013  
14  
15 36 Ko BS, Kim WY, Ryoo SM, *et al*. Biphasic reactions in patients with anaphylaxis treated  
16 with corticosteroids. *Ann Allergy, Asthma Immunol* 2015;**115**:312–6.  
17 doi:10.1016/j.anai.2015.07.015  
18  
19 37 Douglas DM, Sukenick E, Andrade WP, *et al*. Biphasic systemic anaphylaxis: An  
20 inpatient and outpatient study. *J Allergy Clin Immunol* 1994;**93**:977–85.  
21 doi:10.1016/S0091-6749(94)70044-3  
22  
23 38 Saleh-Langenberg J, Flokstra-De Blok BMJ, Alagla N, *et al*. Late reactions in food-  
24 allergic children and adolescents after double-blind, placebo-controlled food challenges.  
25 *Allergy Eur J Allergy Clin Immunol* 2016;**71**:1069–73. doi:10.1111/all.12923  
26  
27 39 Irani AM. Further evaluations of factors that may predict biphasic reactions in emergency  
28 department anaphylaxis patients. *Pediatrics* 2018;**142**:S222–3. doi:10.1542/peds.2018-  
29 2420Y  
30  
31 40 Kim TH, Yoon SH, Lee SY, *et al*. Biphasic and protracted anaphylaxis to iodinated  
32 contrast media. *Eur Radiol* 2018;**28**:1242–52. doi:10.1007/s00330-017-5052-0  
33  
34 41 Brady WJ, Lubner S, Carter CT, *et al*. Multiphasic anaphylaxis: An uncommon event in the  
35 emergency department. *Acad Emerg Med* 1997;**4**:193–7. doi:10.1111/j.1553-  
36 2712.1997.tb03739.x  
37  
38 42 Popa VT, Lerner SA. Biphasic systemic anaphylactic reaction: Three illustrative cases.  
39 *Ann Allergy* 1984;**53**:151–5.  
40  
41 43 Stark BJ, Sullivan TJ. Biphasic and protracted anaphylaxis. *J Allergy Clin Immunol*  
42 1986;**78**:76–83. doi:10.1016/0091-6749(86)90117-X  
43  
44 44 Ellis AK, Day JH. Incidence and characteristics of biphasic anaphylaxis: A prospective  
45 evaluation of 103 patients. *Ann Allergy, Asthma Immunol* 2007;**98**:64–9.  
46 doi:10.1016/S1081-1206(10)60861-7  
47  
48 45 Scranton SE, Gonzalez EG, Waibel KH. Incidence and characteristics of biphasic  
49 reactions after allergen immunotherapy. *J Allergy Clin Immunol* 2009;**123**:493–8.  
50 doi:10.1016/j.jaci.2008.10.026  
51  
52 46 Mehr S, Liew WK, Tey D, *et al*. Clinical predictors for biphasic reactions in children  
53 presenting with anaphylaxis. *Rev Port Imunoalergologia* 2010;**18**:83. doi:10.1111/j.1365-  
54 2222.2009.03276.x  
55  
56 47 Confino-Cohen R, Goldberg A. Allergen immunotherapy–induced biphasic systemic  
57 reactions: incidence, characteristics, and outcome: a prospective study. *Ann Allergy,*  
58 *Asthma Immunol* 2010;**104**:73–8. doi:10.1016/j.anai.2009.11.001  
59  
60 48 Alqurashi W, Ellis AK. Do corticosteroids prevent biphasic anaphylaxis? *J Allergy Clin*  
*Immunol Pract* 2017;**5**:1194–205.  
49 Shaker MS, Wallace D V, Golden DBK, *et al*. Anaphylaxis—a 2020 practice parameter  
update, systematic review, and Grading of Recommendations, Assessment, Development

- and Evaluation (GRADE) analysis. *J Allergy Clin Immunol* 2020;**145**:1082–123. doi:10.1016/j.jaci.2020.01.017
- 50 Lee S, Bellolio MF, Hess EP, *et al*. Time of onset and predictors of biphasic anaphylactic reactions: a systematic review and meta-analysis. *J Allergy Clin Immunol Pract* 2015;**3**:408–16. doi:10.1016/j.jaip.2014.12.010
- 51 Kemp SF. The post-anaphylaxis dilemma: how long is long enough to observe a patient after resolution of symptoms? *Curr Allergy Asthma Rep* 2008;**8**:45–8.
- 52 Lee S, Sadosty AT, Campbell RL. Update on biphasic anaphylaxis. *Curr Opin Allergy Clin Immunol* 2016;**16**:346–51. doi:10.1097/ACI.0000000000000279
- 53 Parlamán JP, Oron AP, Uspal NG, *et al*. Emergency and hospital care for food-related anaphylaxis in children. *Hosp Pediatr* 2016;**6**:269–74. doi:10.1542/hpeds.2015-0153
- 54 Michelson KA, Monuteaux MC, Neuman MI. Variation and trends in anaphylaxis care in United States children's hospitals. *Acad Emerg Med* 2016;**23**:623–7. doi:10.1111/acem.12922
- 55 Gupta R, Holdford D, Bilaver L, *et al*. The economic impact of childhood food allergy in the United States. *JAMA Pediatr* 2013;**167**:1026–31. doi:10.1001/jamapediatrics.2013.2376
- 56 Shaker M, Wallace D, Golden DBK, *et al*. Simulation of health and economic benefits of extended observation of resolved anaphylaxis. *JAMA Netw open* 2019;**2**:e1913951–e1913951.
- 57 Simons FER, Arduoso LRF, Bilò MB, *et al*. International consensus on (ICON) anaphylaxis. *World Allergy Organ J* 2014;**7**:9. doi:10.1186/1939-4551-7-9
- 58 Sicherer SH, Allen K, Lack G, *et al*. Critical issues in food allergy: a national academies consensus report. *Pediatrics* 2017;**140**. doi:10.1542/peds.2017-0194
- 59 National Academies of Sciences and Medicine E. *Finding a path to safety in food allergy: assessment of the global burden, causes, prevention, management, and public policy*. Washington: : National Academies Press 2017. doi:10.17226/23658
- 60 National Institute for Health and Clinical Excellence. Anaphylaxis: assessment and referral after emergency treatment | Guidance and guidelines | NICE. 2016. <https://www.nice.org.uk/guidance/cg134/chapter/4-Research-recommendations#the-frequency-and-effects-of-biphasic-reactions> (accessed 12 Dec 2016).
- 61 Bialy L, Plint AC, Freedman SB, *et al*. Pediatric Emergency Research Canada (PERC): Patient/Family-informed Research Priorities for Pediatric Emergency Medicine. *Acad Emerg Med* 2018;**25**:1365–74. doi:10.1111/acem.13493
- 62 Stiell IG, Wells GA, Vandemheen K, *et al*. The Canadian CT Head Rule for patients with minor head injury. *Lancet* 2001;**357**:1391–6. doi:10.1016/S0140-6736(00)04561-X
- 63 McGinn TG, Guyatt GH, Wyer PC, *et al*. Users' guides to the medical literature: XXII: how to use articles about clinical decision rules. *Jama* 2000;**284**:79–84. doi:10.1001/jama.284.1.79
- 64 Wynants L, Collins GS, Van Calster B. Key steps and common pitfalls in developing and validating risk models. *BJOG An Int J Obstet Gynaecol* 2017;**124**:423–32. doi:10.1111/1471-0528.14170
- 65 Reilly BM, Evans AT. Translating clinical research into clinical practice: impact of using prediction rules to make decisions. *Ann Intern Med* 2006;**144**:201–9. doi:10.7326/0003-4819-144-3-200602070-00009
- 66 Green SM, Schriger DL, Yealy DM. Methodologic standards for interpreting clinical

- 1  
2  
3 decision rules in emergency medicine: 2014 update. *Ann Emerg Med* 2014;**64**:286–91.  
4 doi:10.1016/j.annemergmed.2014.01.016
- 5  
6 67 Steyerberg EW, Vergouwe Y. Towards better clinical prediction models: seven steps for  
7 development and an ABCD for validation. *Eur Heart J* 2014;**35**:1925–31.  
8 doi:10.1093/eurheartj/ehu207
- 9  
10 68 Steyerberg EW, Uno H, Ioannidis JPA, *et al.* Poor performance of clinical prediction  
11 models: the harm of commonly applied methods. *J Clin Epidemiol* 2018;**98**:133–43.  
12 doi:10.1016/j.jclinepi.2017.11.013
- 13  
14 69 Riley R. Prognostic model research. 2020.<https://www.prognosisresearch.com/>  
15 Harrell FE. *Regression modeling strategies: with applications to linear models, logistic*  
16 *regression, and survival analysis 2nd Edition*. 2nd ed. Springer International Publishing  
17 2015. doi:10.1007/978-3-319-19425-7
- 18  
19 71 Steyerberg EW. *Clinical prediction models: A Practical Approach to Development,*  
20 *Validation, and Updating*. Springer 2009.
- 21  
22 72 Riley RD, Hayden JA, Steyerberg EW, *et al.* Prognosis Research Strategy (PROGRESS)  
23 2: Prognostic Factor Research. *PLoS Med* 2013;**10**:e1001380.  
24 doi:10.1371/journal.pmed.1001380
- 25  
26 73 Steyerberg EW, Moons KGM, van der Windt DA, *et al.* Prognosis Research Strategy  
27 (PROGRESS) 3: prognostic model research. *PLoS Med* 2013;**10**:e1001381.  
28 doi:10.1371/journal.pmed.1001381
- 29  
30 74 Collins GS, Reitsma JB, Altman DG, *et al.* Transparent reporting of a multivariable  
31 prediction model for individual prognosis or diagnosis (TRIPOD): the TRIPOD statement.  
32 *J Br Surg* 2015;**102**:148–58. doi:10.1002/bjs.9736
- 33  
34 75 Turner PJ, Worm M, Ansotegui IJ, *et al.* Time to revisit the definition and clinical criteria  
35 for anaphylaxis? *World Allergy Organ J* 2019;**12**. doi:10.1016/j.waojou.2019.100066
- 36  
37 76 Campbell RL, Li JTC, Nicklas RA, *et al.* Emergency department diagnosis and treatment  
38 of anaphylaxis: a practice parameter. *Ann Allergy, Asthma Immunol* 2014;**113**:599–608.  
39 doi:10.1016/j.anai.2014.10.007
- 40  
41 77 Australian Society of Clinical Immunology and Allergy. Acute Management of  
42 Anaphylaxis. 2021;:1–  
43 10.[https://allergy.org.au/images/ASCI\\_HP\\_Guidelines\\_Acute\\_Management\\_Anaphylax](https://allergy.org.au/images/ASCI_HP_Guidelines_Acute_Management_Anaphylaxis_2021.pdf)  
44 [is\\_2021.pdf](https://allergy.org.au/images/ASCI_HP_Guidelines_Acute_Management_Anaphylaxis_2021.pdf)
- 45  
46 78 Bialy L, Plint A, Zemek R, *et al.* Pediatric emergency research Canada: origins and  
47 evolution. *Pediatr Emerg Care* 2018;**34**:138–44. doi:10.1097/PEC.0000000000001360
- 48  
49 79 Dribin TE, Sampson HA, Camargo Jr CA, *et al.* Persistent, refractory, and biphasic  
50 anaphylaxis: a multidisciplinary Delphi study. *J Allergy Clin Immunol* 2020;**146**:1089–96.  
51 doi:10.1016/j.jaci.2020.08.015
- 52  
53 80 Nagata S, Ohbe H, Jo T, *et al.* Glucocorticoids and Rates of Biphasic Reactions in Patients  
54 with Adrenaline-Treated Anaphylaxis: A Propensity Score Matching Analysis. *Int Arch*  
55 *Allergy Immunol* 2022;**183**:939–45. doi:10.1159/000524612
- 56  
57 81 Gupta RS, Sehgal S, Brown DA, *et al.* Characterizing Biphasic Food-Related Allergic  
58 Reactions Through a US Food Allergy Patient Registry. *J Allergy Clin Immunol Pract*  
59 2021;**9**:3717–27. doi:10.1016/j.jaip.2021.05.009
- 60  
61 82 Alqurashi W. Biphasic Anaphylaxis: Epidemiology, Predictors, and Management. In: Ellis  
62 AK, ed. *Anaphylaxis: A Practical Guide*. Springer Nature 2020. 43–60. doi:10.1007/978-  
63 3-030-43205-8\_4

- 1  
2  
3 83 Riley RD, Ensor J, Snell KIE, *et al.* Calculating the sample size required for developing a  
4 clinical prediction model. *Bmj* 2020;**368**. doi:10.1136/bmj.m441
- 5 84 Riley RD, Snell KIE, Ensor J, *et al.* Minimum sample size for developing a multivariable  
6 prediction model: Part I—Continuous outcomes. *Stat Med* 2019;**38**:1262–75.  
7 doi:10.1002/sim.7993
- 8 85 Schuh S, Babl FE, Dalziel SR, *et al.* Practice variation in acute bronchiolitis: a pediatric  
9 emergency research networks study. *Pediatrics* 2017;**140**. doi:10.1542/peds.2017-0842
- 10 86 Dalziel SR, Thompson JMD, Macias CG, *et al.* Predictors of severe H1N1 infection in  
11 children presenting within Pediatric Emergency Research Networks (PERN): retrospective  
12 case-control study. *Bmj* 2013;**347**. doi:10.1136/bmj.f4836
- 13 87 Kraft M, Hofmeier KS, Ruëff F, *et al.* Risk factors and characteristics of biphasic  
14 anaphylaxis. *J Allergy Clin Immunol Pract* 2020;**8**:3388–95.  
15 doi:10.1016/j.jaip.2020.07.036
- 16 88 Worm M, Francuzik W, Renaudin J, *et al.* Factors increasing the risk for a severe reaction  
17 in anaphylaxis: An analysis of data from The European Anaphylaxis Registry. *Allergy*  
18 2018;**73**:1322–30. doi:10.1111/all.13380
- 19 89 Turner PJ, Gowland MH, Sharma V, *et al.* Increase in anaphylaxis-related hospitalizations  
20 but no increase in fatalities: an analysis of United Kingdom national anaphylaxis data,  
21 1992-2012. *J Allergy Clin Immunol* 2015;**135**:956–63. doi:10.1016/j.jaci.2014.10.021
- 22 90 Motosue MS, Bellolio MF, Van Houten HK, *et al.* Risk factors for severe anaphylaxis in  
23 the United States. *Ann Allergy, Asthma Immunol* 2017;**119**:356–61.  
24 doi:10.1016/j.anai.2017.07.014
- 25 91 Mullins RJ, Wainstein BK, Barnes EH, *et al.* Increases in anaphylaxis fatalities in  
26 Australia from 1997 to 2013. *Clin Exp Allergy* 2016;**46**:1099–110. doi:10.1111/cea.12748
- 27 92 Xing Y, Zhang H, Sun S, *et al.* Clinical features and treatment of pediatric patients with  
28 drug-induced anaphylaxis: a study based on pharmacovigilance data. *Eur J Pediatr*  
29 2018;**177**:145–54. doi:10.1007/s00431-017-3048-z
- 30 93 Smith PK, Hourihane JO, Lieberman P. Risk multipliers for severe food anaphylaxis.  
31 *World Allergy Organ J* 2015;**8**:1–6. doi:10.1186/s40413-015-0081-0
- 32 94 Hompes S, Köhli A, Nemat K, *et al.* Provoking allergens and treatment of anaphylaxis in  
33 children and adolescents—data from the anaphylaxis registry of German-speaking  
34 countries. *Pediatr allergy Immunol* 2011;**22**:568–74. doi:10.1111/j.1399-  
35 3038.2011.01154.x
- 36 95 Niggemann B, Beyer K. Factors augmenting allergic reactions. *Allergy* 2014;**69**:1582–7.  
37 doi:10.1111/all.12532
- 38 96 Muñoz-Cano R, Pascal M, Araujo G, *et al.* Mechanisms, cofactors, and augmenting  
39 factors involved in anaphylaxis. *Front Immunol* 2017;**8**:1193.  
40 doi:10.3389/fimmu.2017.01193
- 41 97 Cameron PA, Rainer TH. Anaphylaxis presentations to an emergency department in Hong  
42 Kong: incidence and predictors of biphasic reactions. *J Emerg Med* 2005;**28**:381–8.  
43 doi:10.1016/j.jemermed.2004.11.028
- 44 98 Brazil E, MacNamara AF. “Not so immediate” hypersensitivity--the danger of biphasic  
45 anaphylactic reactions. *Emerg Med J* 1998;**15**:252–3. doi:10.1136/emj.15.4.252
- 46 99 Oya S, Kinoshita K, Daya M, *et al.* Characteristics of Anaphylactic Reactions: A  
47 Prospective Observational Study in Japan. *J Emerg Med* 2020;**59**:812–9.  
48 doi:10.1016/j.jemermed.2020.07.004
- 49  
50  
51  
52  
53  
54  
55  
56  
57  
58  
59  
60

- 1  
2  
3 100 Campbell RL, Bashore CJ, Lee S, *et al.* Predictors of repeat epinephrine administration for  
4 emergency department patients with anaphylaxis. *J Allergy Clin Immunol Pract*  
5 2015;**3**:576–84. doi:10.1016/j.jaip.2015.04.009  
6  
7 101 Lee JM, Greenes DS. Biphasic anaphylactic reactions in pediatrics. *Pediatrics*  
8 2000;**106**:762–6. doi:10.1542/peds.106.4.762  
9  
10 102 Poachanukoon O, Paopairochanakorn C. Incidence of Anaphylaxis in the Emer-gency  
11 Department: A 1-Year Study in a University Hospital. *Asian Pacific J allergy Immunol*  
12 2006;**24**:111.  
13  
14 103 Brown SGA. Clinical features and severity grading of anaphylaxis. *J Allergy Clin*  
15 *Immunol* 2004;**114**:371–6. doi:10.1016/j.jaci.2004.04.029  
16  
17 104 R Core Team. R: A language and environment for statistical computing. R Found. Stat.  
18 Comput. 2021. <https://www.r-project.org/>  
19  
20 105 Royston P, Moons KGM, Altman DG, *et al.* Prognosis and prognostic research:  
21 developing a prognostic model. *Bmj* 2009;**338**. doi:10.1136/bmj.b604  
22  
23 106 Harrell Jr FE, Lee KL, Mark DB. Multivariable prognostic models: issues in developing  
24 models, evaluating assumptions and adequacy, and measuring and reducing errors. *Stat*  
25 *Med* 1996;**15**:361–87.  
26  
27 107 Steyerberg EW, Eijkemans MJC, Harrell Jr FE, *et al.* Prognostic modeling with logistic  
28 regression analysis: in search of a sensible strategy in small data sets. *Med Decis Mak*  
29 2001;**21**:45–56. doi:10.1177/0272989X0102100106  
30  
31 108 Vadas P, Perelman B, Liss G. Platelet-activating factor, histamine, and tryptase levels in  
32 human anaphylaxis. *J Allergy Clin Immunol* 2013;**131**:144–9.  
33 doi:10.1016/j.jaci.2012.08.016  
34  
35 109 Vadas P, Perelman B. Effect of epinephrine on platelet-activating factor–stimulated  
36 human vascular smooth muscle cells. *J Allergy Clin Immunol* 2012;**129**:1329–33.  
37 doi:10.1016/j.jaci.2012.02.027  
38  
39 110 Alba AC, Agoritsas T, Walsh M, *et al.* Discrimination and calibration of clinical  
40 prediction models: users’ guides to the medical literature. *Jama* 2017;**318**:1377–84.  
41 doi:10.1001/jama.2017.12126  
42  
43 111 Vickers AJ, Van Calster B, Steyerberg EW. Net benefit approaches to the evaluation of  
44 prediction models, molecular markers, and diagnostic tests. *bmj* 2016;**352**.  
45 doi:10.1136/bmj.i6  
46  
47 112 Steyerberg EW, Vickers AJ, Cook NR, *et al.* Assessing the performance of prediction  
48 models: a framework for some traditional and novel measures. *Epidemiology*  
49 2010;**21**:128.  
50  
51 113 Steyerberg EW, Harrell Jr FE. Prediction models need appropriate internal, internal-  
52 external, and external validation. *J Clin Epidemiol* 2016;**69**:245.  
53 doi:10.1016/j.jclinepi.2015.04.005  
54  
55 114 Toll DB, Janssen KJM, Vergouwe Y, *et al.* Validation, updating and impact of clinical  
56 prediction rules: a review. *J Clin Epidemiol* 2008;**61**:1085–94.  
57 doi:10.1016/j.jclinepi.2008.04.008  
58  
59 115 Steyerberg EW, Harrell Jr FE, Borsboom GJJM, *et al.* Internal validation of predictive  
60 models: efficiency of some procedures for logistic regression analysis. *J Clin Epidemiol*  
2001;**54**:774–81. doi:10.1016/S0895-4356(01)00341-9  
61  
62 116 Moons KGM, Altman DG, Reitsma JB, *et al.* Transparent Reporting of a multivariable  
63 prediction model for Individual Prognosis or Diagnosis (TRIPOD): explanation and



- 1  
2  
3 elaboration. *Ann Intern Med* 2015;**162**:W1–73. doi:10.7326/M14-0698
- 4 117 Grady D, Berkowitz SA. Why is a good clinical prediction rule so hard to find? *Arch*  
5 *Intern Med* 2011;**171**:1701–2.
- 6 118 Collins GS, de Groot JA, Dutton S, *et al*. External validation of multivariable prediction  
7 models: a systematic review of methodological conduct and reporting. *BMC Med Res*  
8 *Methodol* 2014;**14**:1–11. doi:10.1186/1471-2288-14-40
- 9 119 Ban J-W, Emparanza JI, Urreta I, *et al*. Design characteristics influence performance of  
10 clinical prediction rules in validation: a meta-epidemiological study. *PLoS One*  
11 2016;**11**:e0145779. doi:10.1371/journal.pone.0145779
- 12 120 Alisic E, Hoysted C, Kassam-Adams N, *et al*. Psychosocial care for injured children:  
13 Worldwide survey among hospital emergency department staff. *J Pediatr* 2016;**170**:227–  
14 33.
- 15 121 Sullivan LM, Massaro JM, D’Agostino Sr RB. Likelihood Modelling: Presentation of  
16 Multivariate Data for Clinical Use: The Framingham Study Risk Score Functions. In:  
17 D’Agostino Sr RB, ed. *Tutorials in Biostatistics: Statistical Modelling of Complex*  
18 *Medical Data*. Wiley Online Library 2004. 445–76. doi:10.1002/0470023724.ch1d(ix)
- 19 122 Bonnett LJ, Snell KIE, Collins GS, *et al*. Guide to presenting clinical prediction models  
20 for use in clinical settings. *bmj* 2019;**365**. doi:10.1136/bmj.1737
- 21 123 Bowen S, Graham ID. Integrated knowledge translation. In: Graham ID, Strauss SE,  
22 Tetroe J, eds. *Knowledge translation in health care: Moving from evidence to practice*.  
23 Wiley Blackwell Oxford 2013. 14–21.
- 24 124 Gagliardi AR, Berta W, Kothari A, *et al*. Integrated knowledge translation (IKT) in health  
25 care: a scoping review. *Implement Sci* 2015;**11**:1–12. doi:10.1186/s13012-016-0399-1
- 26 125 CIHR. Guide to Knowledge Translation Planning at CIHR: Integrated and End-of-Grant  
27 Approaches. 2012. <http://www.cihr-irsc.gc.ca/e/45321.html#a5> (accessed 11 Apr 2016).
- 28 126 Lomas J. Diffusion, dissemination, and implementation: who should do what? *Ann N Y*  
29 *Acad Sci* 1993;**703**:226–37. doi:10.1111/j.1749-6632.1993.tb26351.x
- 30 127 PERN. PERN-Global.com. <https://www.pern-global.com/> (accessed 11 Apr 2016).
- 31 128 TREKK.ca. TREKK.ca. <http://trekk.ca/> (accessed 10 Jan 2017).
- 32  
33  
34  
35  
36  
37  
38  
39  
40  
41  
42  
43  
44  
45  
46  
47  
48  
49  
50  
51  
52  
53  
54  
55  
56  
57  
58  
59  
60

## SUPPLEMENTARY MATERIAL:

### Supplementary Material A - Sample Size Calculation

Following (Riley 2019, Riley 2020), the sample size is considered from four perspectives, and the largest sample size calculated is selected as the overall sample size needed.

1. Approximate 95% confidence interval for overall outcome proportion in study population

$$n = \left( \frac{1.96}{\delta} \right)^2 \hat{\theta}(1 - \hat{\theta})$$

$\hat{\theta} = .10$  or  $.15$  - overall outcome proportion in study population

Then for:

$$\hat{\theta} = .10, n=139$$

$$\hat{\theta} = .15, n=196$$

2. Mean absolute prediction error (MAPE) - average error in the model's outcome

$$n = \exp \left( \frac{-0.508 + 0.259 \ln(\theta) + 0.504 \ln(P) - \ln(MAPE)}{0.544} \right)$$

MAPE=0.050 - suggested MAPE is no larger than 0.050 (lower values in settings may be appropriate where precise predictions are needed if consequences of wrong decisions are large)

P=18 - number of predictors

For  $\hat{\theta} = .10$ , then n=274

For  $\hat{\theta} = .15$ , then n=332

3. Achieve expected uniform shrinkage factor S

$$n = \frac{P}{(S - 1) \ln \left( 1 - \frac{R_{CS}^2}{S} \right)}$$

$R_{CS}^2 = 0.10$  or  $0.15$  - proportion of overall variation

explained P=19 - number of predictors

S=0.9 or 0.85 - suggested target for shrinkage of  $\leq 10\%$  (i.e.  $S \geq 0.9$ )

For  $R_{cs}^2 = 0.10$ ,  $S = 0.9$ , then  $n=1529$

For  $R_{cs}^2 = 0.15$ ,  $S = 0.9$ , then  $n=988$

For  $R_{cs}^2 = 0.10$ ,  $S = 0.85$ , then  $n=959$

For  $R_{cs}^2 = 0.15$ ,  $S = 0.85$ , then  $n=1529$

4. Ensure a small expected optimism in apparent  $R^2$

$$n = \frac{P}{(S - 1) \ln \left( 1 - \frac{R_{cs}^2}{S} \right)}$$

Where

$$S = \frac{R_{cs}^2}{R_{cs}^2 + \delta \max(R_{cs}^2)}$$

$$\max(R_{cs}^2) = 1 - \exp \left( \frac{2 \ln L_{null}}{n} \right)$$

$$\ln L_{null} = E \ln \left( \frac{E}{n} \right) + (n - E) \ln \left( 1 - \frac{E}{n} \right)$$

and consider  $\frac{E}{n} = \theta$

For  $\hat{\theta} = .10$ ,  $R_{cs}^2 = 0.10$  then  $\max(R_{cs}^2) = 0.48$ ,  $S = 0.81$  and  $n = 719$

For  $\hat{\theta} = .10$ ,  $R_{cs}^2 = 0.15$  then  $\max(R_{cs}^2) = 0.48$ ,  $S = 0.81$  and  $n = 463$

For  $\hat{\theta} = .15$ ,  $R_{cs}^2 = 0.10$  then  $\max(R_{cs}^2) = 0.57$ ,  $S = 0.84$  and  $n = 888$

For  $\hat{\theta} = .15$ ,  $R_{cs}^2 = 0.15$  then  $\max(R_{cs}^2) = 0.57$ ,  $S = 0.84$  and  $n = 572$

## References

Riley RD et al, Calculating the sample size required for developing a clinical prediction model. *BMJ* 2020;368:m441 doi: 10.1136/bmj.m441.

Riley RD, Snell KI, Ensor J, et al . Minimum sample size for developing a multivariable prediction model: PART II - binary and time-to-event outcomes. *Stat Med* 2019;38:1276-96. 10.1002/sim.7992 30357870

## STROBE Statement—checklist of items that should be included in reports of observational studies

|                              | Item No | Recommendation                                                                                                                                                                                                                                                                                                                                                                                                                                                         | Page No |
|------------------------------|---------|------------------------------------------------------------------------------------------------------------------------------------------------------------------------------------------------------------------------------------------------------------------------------------------------------------------------------------------------------------------------------------------------------------------------------------------------------------------------|---------|
| <b>Title and abstract</b>    | 1       | (a) Indicate the study's design with a commonly used term in the title or the abstract                                                                                                                                                                                                                                                                                                                                                                                 | 4       |
|                              |         | (b) Provide in the abstract an informative and balanced summary of what was done and what was found                                                                                                                                                                                                                                                                                                                                                                    | 4 – 5   |
| <b>Introduction</b>          |         |                                                                                                                                                                                                                                                                                                                                                                                                                                                                        |         |
| Background/rationale         | 2       | Explain the scientific background and rationale for the investigation being reported                                                                                                                                                                                                                                                                                                                                                                                   | 7 – 8   |
| Objectives                   | 3       | State specific objectives, including any prespecified hypotheses                                                                                                                                                                                                                                                                                                                                                                                                       | 8       |
| <b>Methods</b>               |         |                                                                                                                                                                                                                                                                                                                                                                                                                                                                        |         |
| Study design                 | 4       | Present key elements of study design early in the paper                                                                                                                                                                                                                                                                                                                                                                                                                | 9       |
| Setting                      | 5       | Describe the setting, locations, and relevant dates, including periods of recruitment, exposure, follow-up, and data collection                                                                                                                                                                                                                                                                                                                                        | 9 – 10  |
| Participants                 | 6       | (a) <i>Cohort study</i> —Give the eligibility criteria, and the sources and methods of selection of participants. Describe methods of follow-up<br><i>Case-control study</i> —Give the eligibility criteria, and the sources and methods of case ascertainment and control selection. Give the rationale for the choice of cases and controls<br><i>Cross-sectional study</i> —Give the eligibility criteria, and the sources and methods of selection of participants | 9 – 10  |
|                              |         | (b) <i>Cohort study</i> —For matched studies, give matching criteria and number of exposed and unexposed<br><i>Case-control study</i> —For matched studies, give matching criteria and the number of controls per case                                                                                                                                                                                                                                                 | N/A     |
| Variables                    | 7       | Clearly define all outcomes, exposures, predictors, potential confounders, and effect modifiers. Give diagnostic criteria, if applicable                                                                                                                                                                                                                                                                                                                               | 11      |
| Data sources/<br>measurement | 8*      | For each variable of interest, give sources of data and details of methods of assessment (measurement). Describe comparability of assessment methods if there is more than one group                                                                                                                                                                                                                                                                                   | 11 – 13 |
| Bias                         | 9       | Describe any efforts to address potential sources of bias                                                                                                                                                                                                                                                                                                                                                                                                              | N/A     |
| Study size                   | 10      | Explain how the study size was arrived at                                                                                                                                                                                                                                                                                                                                                                                                                              | 14 – 15 |
| Quantitative variables       | 11      | Explain how quantitative variables were handled in the analyses. If applicable, describe which groupings were chosen and why                                                                                                                                                                                                                                                                                                                                           | 15 – 16 |
| Statistical methods          | 12      | (a) Describe all statistical methods, including those used to control for confounding                                                                                                                                                                                                                                                                                                                                                                                  | 16 – 20 |
|                              |         | (b) Describe any methods used to examine subgroups and interactions                                                                                                                                                                                                                                                                                                                                                                                                    | N/A     |
|                              |         | (c) Explain how missing data were addressed                                                                                                                                                                                                                                                                                                                                                                                                                            | 17      |
|                              |         | (d) <i>Cohort study</i> —If applicable, explain how loss to follow-up was addressed<br><i>Case-control study</i> —If applicable, explain how matching of cases and controls was addressed<br><i>Cross-sectional study</i> —If applicable, describe analytical methods taking account of sampling strategy                                                                                                                                                              | N/A     |
|                              |         | (e) Describe any sensitivity analyses                                                                                                                                                                                                                                                                                                                                                                                                                                  | N/A     |

Continued on next page

| <b>Results</b>           |     |                                                                                                                                                                                                              | <b>Page No</b> |
|--------------------------|-----|--------------------------------------------------------------------------------------------------------------------------------------------------------------------------------------------------------------|----------------|
| Participants             | 13* | (a) Report numbers of individuals at each stage of study—eg numbers potentially eligible, examined for eligibility, confirmed eligible, included in the study, completing follow-up, and analysed            | N/A            |
|                          |     | (b) Give reasons for non-participation at each stage                                                                                                                                                         | N/A            |
|                          |     | (c) Consider use of a flow diagram                                                                                                                                                                           | N/A            |
| Descriptive data         | 14* | (a) Give characteristics of study participants (eg demographic, clinical, social) and information on exposures and potential confounders                                                                     | N/A            |
|                          |     | (b) Indicate number of participants with missing data for each variable of interest                                                                                                                          | N/A            |
|                          |     | (c) <i>Cohort study</i> —Summarise follow-up time (eg, average and total amount)                                                                                                                             | N/A            |
| Outcome data             | 15* | <i>Cohort study</i> —Report numbers of outcome events or summary measures over time                                                                                                                          | N/A            |
|                          |     | <i>Case-control study</i> —Report numbers in each exposure category, or summary measures of exposure                                                                                                         | N/A            |
|                          |     | <i>Cross-sectional study</i> —Report numbers of outcome events or summary measures                                                                                                                           | N/A            |
| Main results             | 16  | (a) Give unadjusted estimates and, if applicable, confounder-adjusted estimates and their precision (eg, 95% confidence interval). Make clear which confounders were adjusted for and why they were included | N/A            |
|                          |     | (b) Report category boundaries when continuous variables were categorized                                                                                                                                    | N/A            |
|                          |     | (c) If relevant, consider translating estimates of relative risk into absolute risk for a meaningful time period                                                                                             | N/A            |
| Other analyses           | 17  | Report other analyses done—eg analyses of subgroups and interactions, and sensitivity analyses                                                                                                               | N/A            |
| <b>Discussion</b>        |     |                                                                                                                                                                                                              |                |
| Key results              | 18  | Summarise key results with reference to study objectives                                                                                                                                                     | N/A            |
| Limitations              | 19  | Discuss limitations of the study, taking into account sources of potential bias or imprecision. Discuss both direction and magnitude of any potential bias                                                   | N/A            |
| Interpretation           | 20  | Give a cautious overall interpretation of results considering objectives, limitations, multiplicity of analyses, results from similar studies, and other relevant evidence                                   | N/A            |
| Generalisability         | 21  | Discuss the generalisability (external validity) of the study results                                                                                                                                        | N/A            |
| <b>Other information</b> |     |                                                                                                                                                                                                              |                |
| Funding                  | 22  | Give the source of funding and the role of the funders for the present study and, if applicable, for the original study on which the present article is based                                                | 25             |

\*Give information separately for cases and controls in case-control studies and, if applicable, for exposed and unexposed groups in cohort and cross-sectional studies.

**Note:** An Explanation and Elaboration article discusses each checklist item and gives methodological background and published examples of transparent reporting. The STROBE checklist is best used in conjunction with this article (freely available on the Web sites of PLoS Medicine at <http://www.plosmedicine.org/>, Annals of Internal Medicine at <http://www.annals.org/>, and Epidemiology at <http://www.epidem.com/>). Information on the STROBE Initiative is available at [www.strobe-statement.org](http://www.strobe-statement.org).
