# Supplementary material for: Canadian Anaphylaxis Network-Predicting Recurrence after Emergency Presentation for Allergic REaction (CAN-PREPARE): a prospective, cohort study protocol
Source: PubMed Central journal article supplement — BMJ Open. 2022 Oct 31;12(10):e061976. doi: 10.1136/bmjopen-2022-061976 (PMC9628530; doi:10.1136/bmjopen-2022-061976), 2022-10-31
Supplement: bmjopen-2022-061976supp001.pdf [file bmjopen-2022-061976supp001.pdf]

**SUPPLEMENTARY MATERIAL:****Supplementary Material A - Sample Size Calculation**

Following (Riley 2019, Riley 2020), the sample size is considered from four perspectives, and the largest sample size calculated is selected as the overall sample size needed.

1. Approximate 95% confidence interval for overall outcome proportion in study population

$$n = \left( \frac{1.96}{\delta} \right)^2 \hat{\theta}(1 - \hat{\theta})$$

$\hat{\theta} = .10$  or  $.15$  - overall outcome proportion in study population

Then for:

$$\hat{\theta} = .10, n=139$$

$$\hat{\theta} = .15, n=196$$

2. Mean absolute prediction error (MAPE) - average error in the model's outcome

$$n = \exp \left( \frac{-0.508 + 0.259 \ln(\theta) + 0.504 \ln(P) - \ln(MAPE)}{0.544} \right)$$

MAPE=0.050 - suggested MAPE is no larger than 0.050 (lower values in settings may be appropriate where precise predictions are needed if consequences of wrong decisions are large)

P=18 - number of predictors

For  $\hat{\theta} = .10$ , then n=274

For  $\hat{\theta} = .15$ , then n=332

3. Achieve expected uniform shrinkage factor S

$$n = \frac{P}{(S - 1) \ln \left( 1 - \frac{R_{cs}^2}{S} \right)}$$

$R_{cs}^2 = 0.10$  or  $0.15$  - proportion of overall variation

explained P=19 - number of predictors

S=0.9 or 0.85 - suggested target for shrinkage of  $\leq 10\%$  (i.e.  $S \geq 0.9$ )

For  $R_{cs}^2 = 0.10$ ,  $S = 0.9$ , then  $n=1529$

For  $R_{cs}^2 = 0.15$ ,  $S = 0.9$ , then  $n=988$

For  $R_{cs}^2 = 0.10$ ,  $S = 0.85$ , then  $n=959$

For  $R_{cs}^2 = 0.15$ ,  $S = 0.85$ , then  $n=1529$

4. Ensure a small expected optimism in apparent  $R^2$

$$n = \frac{P}{(S - 1) \ln \left( 1 - \frac{R_{cs}^2}{S} \right)}$$

Where

$$S = \frac{R_{cs}^2}{R_{cs}^2 + \delta \max(R_{cs}^2)}$$

$$\max(R_{cs}^2) = 1 - \exp\left(\frac{2 \ln L_{null}}{n}\right)$$

$$\ln L_{null} = E \ln\left(\frac{E}{n}\right) + (n - E) \ln\left(1 - \frac{E}{n}\right)$$

and consider  $\frac{E}{n} = \theta$

For  $\hat{\theta} = .10$ ,  $R_{cs}^2 = 0.10$  then  $\max(R_{cs}^2) = 0.48$ ,  $S = 0.81$  and  $n = 719$

For  $\hat{\theta} = .10$ ,  $R_{cs}^2 = 0.15$  then  $\max(R_{cs}^2) = 0.48$ ,  $S = 0.81$  and  $n = 463$

For  $\hat{\theta} = .15$ ,  $R_{cs}^2 = 0.10$  then  $\max(R_{cs}^2) = 0.57$ ,  $S = 0.84$  and  $n = 888$

For  $\hat{\theta} = .15$ ,  $R_{cs}^2 = 0.15$  then  $\max(R_{cs}^2) = 0.57$ ,  $S = 0.84$  and  $n = 572$

## References

Riley RD et al, Calculating the sample size required for developing a clinical prediction model. *BMJ* 2020;368:m441 doi: 10.1136/bmj.m441.

Riley RD, Snell KI, Ensor J, et al. Minimum sample size for developing a multivariable prediction model: PART II - binary and time-to-event outcomes. *Stat Med* 2019;38:1276-96. 10.1002/sim.7992 30357870
